# Supplementary material for: Dearomative oxyphosphorylation of indoles enables facile access to 2,2-disubstituted indolin-3-ones
Source: Royal Society of Chemistry journal article supplement (doi:10.1039/d2ob01063a), 2022-01-01

# Dearomative oxyphosphorylation of indoles enables facile access to 2,2-disubstituted indolin-3-ones

Ting Xiong, Xingcui Zhou, and Jun Jiang\*

*School of Chemistry and Chemical Engineering, Guangxi Key Laboratory of Electrochemical Energy Materials, Guangxi University, Nanning, 530004, P. R. China.*

E-mail: [jiangjun@gxu.edu.cn](mailto:jiangjun@gxu.edu.cn)

## Contents

|                                                                                                                     |    |
|---------------------------------------------------------------------------------------------------------------------|----|
| 1. General Information.....                                                                                         | 2  |
| 2. Experiment Section.....                                                                                          | 2  |
| 2.1 Experimental procedure for optimization of reaction conditions (Table 1): .....                                 | 2  |
| 2.2 Experimental procedure for gram-scale reaction (Scheme 4): .....                                                | 3  |
| 2.3 Mechanism studies (Scheme 5):.....                                                                              | 3  |
| 3. Reference .....                                                                                                  | 5  |
| 4. Characterization data of the compounds .....                                                                     | 6  |
| 5. Single Crystal X-ray Structure Determinations of Compounds.....                                                  | 16 |
| 6. <sup>1</sup> H NMR, <sup>13</sup> C NMR, <sup>31</sup> P NMR and <sup>19</sup> F NMR spectra for compounds ..... | 18 |

## 1. General Information

NMR spectra were recorded with BrukerAvance III HD500 and BrukerAvance III HD400 spectrometer at 500 MHz or 400 MHz. All  $^1\text{H}$ ,  $^{19}\text{F}$ ,  $^{31}\text{P}$  and  $^{13}\text{C}$  NMR spectra were recorded using  $\text{CDCl}_3$  or  $[\text{D}_6]$  DMSO as solvent. Tetramethylsilane (TMS) signals or residual solvent signals were used [TMS  $\delta = 0.00$  ( $^1\text{H}$  NMR),  $\text{CDCl}_3$   $\delta = 77.16$  ( $^{13}\text{C}$  NMR), DMSO- $d_6$   $\delta = 2.50$  ( $^1\text{H}$  NMR),  $39.52$  ( $^{13}\text{C}$  NMR)] as internal standards. The following abbreviations were used to describe peak splitting patterns when appropriate: s = singlet, d = doublet, dd = double doublet, t = triplet, q = quartet, m = multiplet, qd = quartet doublet. HRMS (ESI) Mass spectra were recorded on Thermo Fisher Scientific LTQ FT Ultra. All the reactions were monitored by thin layer chromatography (TLC), carried out on 0.25 mm silica gel plates using UV light as visualizing agent. Column chromatography was carried out on silica gel (particle size 300-400 mesh). The C2 substituted indoles and TEMPO oxoammonium salts were synthesized according to procedures described in the literature.<sup>[1,2]</sup> Substrates **2** were prepared according to the literature method.<sup>[3]</sup>

## 2. Experiment Section

### 2.1 Experimental procedure for optimization of reaction conditions

(Table 1):

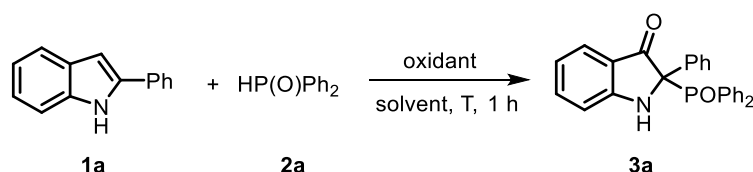

To a solution of 2-phenyl-1H-indole **1a** (0.1 mmol) in 1.5 mL solvent was added oxidant (0.1 mmol) at rt and stirred for 5 min. Then *H*-phosphine oxides **2a** (1.5 mmol) in ethyl acetate (0.5 mL) were added to the mixture. The mixture was stirred at room temperature for 1 h. After reaction, the solution was purified by flash column chromatography on silica gel (petroleum ether/ethyl acetate = 2:1) to give the product **3a**.

## 2.2 Experimental procedure for gram-scale reaction (Scheme 4):

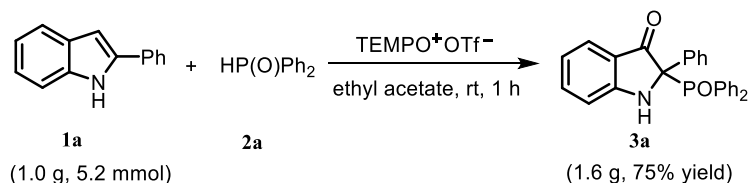

A solution of 2-phenyl-1H-indole **1a** (1.0 g, 5.2 mmol) and TEMPO<sup>+</sup>OTf<sup>-</sup> (1.6 g, 5.2 mmol) in 80 mL ethyl acetate were added to 250 mL round bottom flask at rt until the disappearance of **1a**. H-phosphorus oxide **2a** (1.6 g, 7.8 mmol) in ethyl acetate (10 mL) were added to the mixture for 1h. After reaction, the solution was purified by flash column chromatography on silica gel (petroleum ether/ethyl acetate =2:1 to 1:1) to give the product **3a** (1.6 g) in 75% yield.

## 2.3 Mechanism studies (Scheme 5):

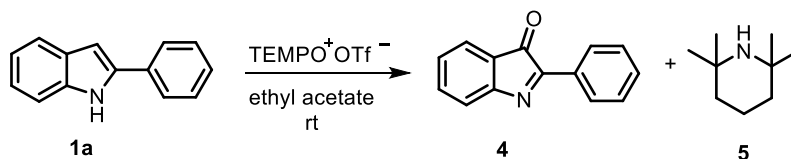

A solution of 2-phenyl-1H-indole **1a** (0.1 mmol) in 2 mL ethyl acetate was added TEMPO<sup>+</sup>OTf<sup>-</sup> (0.1 mmol) at rt. The mixture was stirred until the disappearance of **1a**. Then, the solution was purified by flash column chromatography on silica gel (petroleum ether/ethyl acetate =50:1) to afford the red solid product **4**. The <sup>1</sup>H NMR of **4** was consistent with that reported previously.<sup>[4]</sup> ESI-MS analysis was performed with 2,2,6,6-tetramethylpiperidine **5**.

**2-phenyl-3H-indol-3-one (4)**, <sup>1</sup>H NMR (500 MHz, Chloroform-*d*) δ 8.40–8.34 (m, 2H), 7.57–7.51 (m, 3H), 7.50–7.45 (m, 2H), 7.41 (d, *J* = 7.4 Hz, 1H), 7.25–7.22 (m, 1H). HRMS (ESI) *m/z* calcd for: C<sub>14</sub>H<sub>9</sub>NO [M+H]<sup>+</sup>: 208.0757, found: 208.0759.

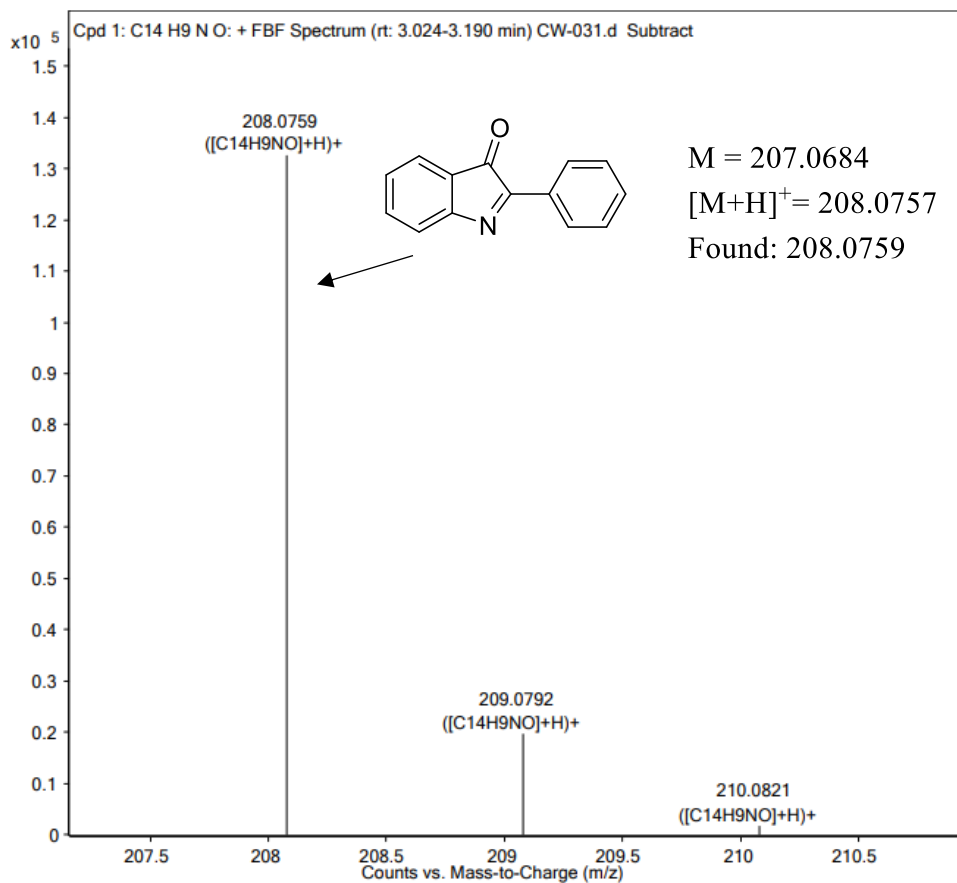

**2,2,6,6-tetramethylpiperidine (5), HRMS (ESI) m/z calcd for: C<sub>9</sub>H<sub>19</sub>N [M+H]<sup>+</sup> : 142.1590, found:142.1593.**

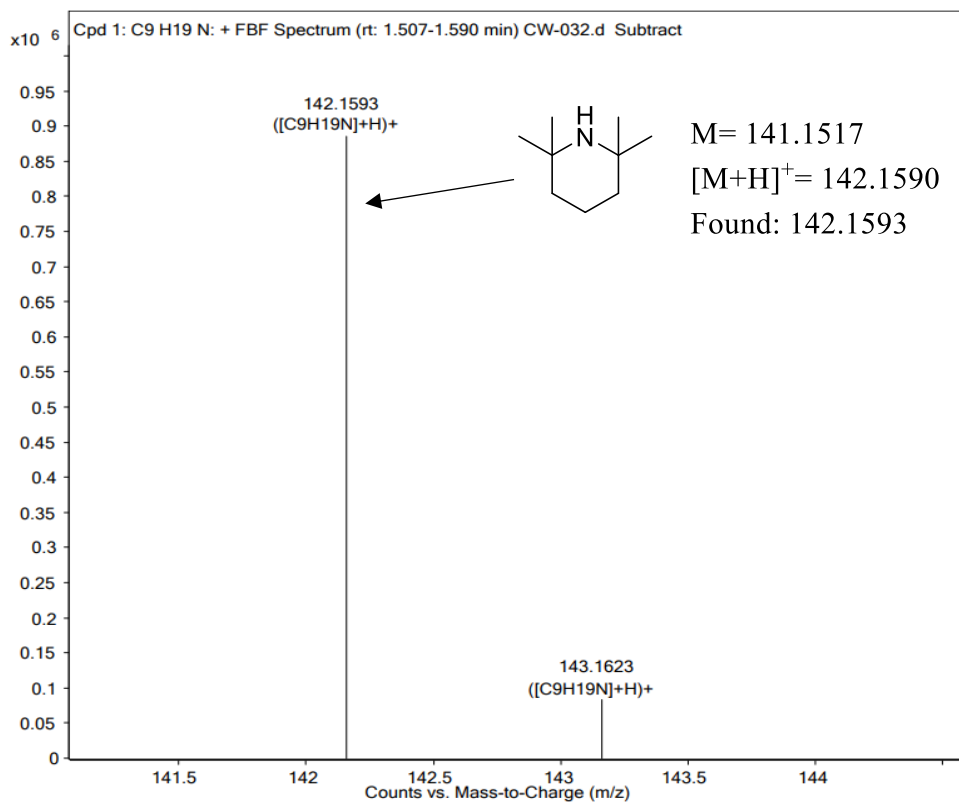

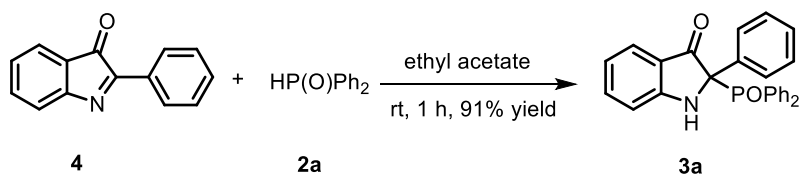

A solution of ketimines **4** (0.0207 g, 0.1 mmol) and *H*-phosphorus oxide **2a** (0.0303 g, 0.15 mmol) in ethyl acetate (2 mL) were added to centrifugal tube. The reaction mixture was stirred at room temperature for 1 h. After reaction, the solution was purified by flash column chromatography on silica gel (petroleum ether/ethyl acetate = 2:1) to give the product **3a** (0.0371 g) in 91% yield.

### 3. Reference

- [1] (a) S. K. Bhunia, A. Polley, R. Natarajan, R. Jana, *Chem.Eur.J.*, 2015, **21**,16786–16791; (b) N. Jacob, L. Guillemard, J. Wencel-Delord, *Synthesis*, 2020, **52**, 574-580.
- [2] X. Liu, X. Yan, Y. Tang, C. S. Jiang, J. H. Yu, K. Wang, H. Zhang, *Chem. Commun.*, 2019, **55**, 6535-6538.
- [3] C. A. Busacca, J. C. Lorenz, N. Grinberg, N. Haddad, M. Hrapchak, B. Latli, H. Lee, P. Sabila, A. Saha, M. Sarvestani, S. Shen, R. Varsolona, X. Wei, C. H. Senanayake, *Org. Lett.*, 2005, **7**, 4277.
- [4] (a) K. Q. Ling, *Synth. Commun.*, 1995, **25**, 3831; (b) J.-X. Liu, Q. Q. Zhou, J. G. Deng, Y. C. Chen, *Org. Biomol. Chem.*, 2013, **11**, 8175; (c) E. Najahi, A. Valentin, P.-L. Fabre, K. Reybier, F. Nepveu, *Eur. J. Med. Chem.*, 2014, **78**, 269.

## 4. Characterization data of the compounds

**2-(diphenylphosphoryl)-2-phenylindolin-3-one (3a).** Yellow solid, 33.0 mg, 81%

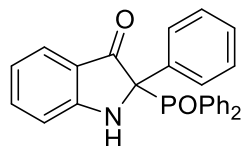

yield.  $^1\text{H NMR}$  (500 MHz,  $\text{DMSO-}d_6$ )  $\delta$  8.65 (s, 1H), 7.83–7.74 (m, 4H), 7.65–7.58 (m, 2H), 7.51 (t,  $J = 7.0$  Hz, 2H), 7.43–7.35 (m, 5H), 7.34–7.28 (m, 3H), 7.22 (d,  $J = 7.7$  Hz, 1H), 6.96 (d,  $J = 8.3$  Hz, 1H), 6.61 (t,  $J = 7.4$  Hz, 1H);  $^{13}\text{C NMR}$  (126 MHz,  $\text{DMSO-}d_6$ )  $\delta$  195.50, 160.82 (d,  $J = 4.9$  Hz), 137.83, 133.85, 133.03 (d,  $J = 8.3$  Hz), 132.72 (d,  $J = 2.2$  Hz), 132.61 (d,  $J = 2.4$  Hz), 132.09 (d,  $J = 8.7$  Hz), 130.64 (d,  $J = 97.4$  Hz), 129.31 (d,  $J = 97.0$  Hz), 128.72 (d,  $J = 11.5$  Hz), 128.48 (d,  $J = 11.4$  Hz), 128.41, 128.33 (d,  $J = 1.4$  Hz), 127.14 (d,  $J = 3.5$  Hz), 124.32, 119.80, 118.73, 112.83, 74.32 (d,  $J = 68.2$  Hz);  $^{31}\text{P NMR}$  (202 MHz,  $\text{DMSO-}d_6$ )  $\delta$  25.82; **HRMS** (ESI)  $m/z$  calcd for:  $\text{C}_{26}\text{H}_{20}\text{NO}_2\text{PNa}$  [ $\text{M}+\text{Na}$ ] $^+$ : 432.1124, found: 432.1124.

**2-(diphenylphosphoryl)-6-methyl-2-phenylindolin-3-one (3b).** Yellow solid, 35.9

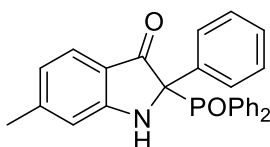

mg, 85% yield.  $^1\text{H NMR}$  (500 MHz,  $\text{Chloroform-}d$ )  $\delta$  8.07–7.98 (m, 2H), 7.89 (dd,  $J = 11.0, 7.8$  Hz, 2H), 7.77 (d,  $J = 7.8$  Hz, 2H), 7.58–7.51 (m, 2H), 7.46–7.36 (m, 3H), 7.33 (d,  $J = 8.0$  Hz, 1H), 7.28–7.23 (m, 2H), 7.23–7.14 (m, 3H), 6.64 (s, 1H), 6.49 (d,  $J = 7.9$  Hz, 1H), 2.23 (s, 3H);  $^{13}\text{C NMR}$  (126 MHz,  $\text{Chloroform-}d$ )  $\delta$  196.07 (d,  $J = 1.2$  Hz), 160.70 (d,  $J = 4.0$  Hz), 149.04, 133.35 (d,  $J = 1.8$  Hz), 133.10 (d,  $J = 9.2$  Hz), 132.28 (d,  $J = 2.8$  Hz), 132.19 (d,  $J = 9.1$  Hz), 132.12 (d,  $J = 2.9$  Hz), 129.23 (d,  $J = 96.6$  Hz), 128.86 (d,  $J = 98.6$  Hz), 128.13–128.05 (m), 127.99 (d,  $J = 1.5$  Hz), 127.89 (d,  $J = 2.0$  Hz), 127.57 (d,  $J = 4.0$  Hz), 124.22, 120.72, 119.11, 112.22, 75.13 (d,  $J = 63.0$  Hz), 22.44;  $^{31}\text{P NMR}$  (202 MHz,  $\text{Chloroform-}d$ )  $\delta$  29.65; **HRMS** (ESI)  $m/z$  calcd for:  $\text{C}_{27}\text{H}_{22}\text{NO}_2\text{PNa}$  [ $\text{M}+\text{Na}$ ] $^+$ : 446.1280, found: 446.1280.

**2-(diphenylphosphoryl)-5-methyl-2-phenylindolin-3-one (3c).** Yellow solid, 37.3

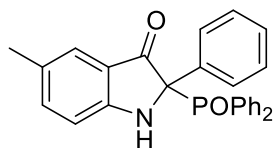

mg, 88% yield.  $^1\text{H NMR}$  (500 MHz,  $\text{Chloroform-}d$ )  $\delta$  8.07–7.97 (m, 2H), 7.92–7.84 (m, 2H), 7.82–7.76 (m, 2H), 7.57 (s, 1H), 7.54–7.50 (m, 1H), 7.45–7.39 (m, 2H), 7.39–7.34 (m, 1H), 7.28–7.16 (m, 6H), 7.12 (dd,  $J = 8.4, 1.8$  Hz, 1H), 6.78 (d,  $J = 8.4$  Hz, 1H), 2.19 (s, 3H);  $^{13}\text{C NMR}$  (126 MHz,  $\text{Chloroform-}d$ )  $\delta$  196.82, 158.74 (d,  $J = 4.0$  Hz), 138.93, 133.36 (d,  $J = 2.0$  Hz), 133.08 (d,  $J = 9.1$  Hz), 132.27 (d,  $J = 2.9$  Hz), 132.18 (d,  $J = 9.1$  Hz), 132.07 (d,  $J = 2.8$  Hz), 129.23 (d,  $J = 96.5$  Hz), 128.84 (d,  $J = 98.5$  Hz), 128.29, 128.09 (d,  $J = 1.8$  Hz), 127.99 (d,  $J = 1.5$  Hz), 127.95, 127.91 (d,  $J = 2.3$  Hz), 127.58 (d,  $J = 3.9$  Hz), 123.72, 121.44, 112.23, 75.26 (d,  $J = 62.6$  Hz), 20.48;  $^{31}\text{P NMR}$  (202 MHz,  $\text{Chloroform-}d$ )  $\delta$  29.44; **HRMS** (ESI)  $m/z$  calcd for:  $\text{C}_{27}\text{H}_{22}\text{NO}_2\text{PNa}$  [ $\text{M}+\text{Na}$ ] $^+$ : 446.1280, found: 446.1280.

**2-(diphenylphosphoryl)-7-methyl-2-phenylindolin-3-one (3d).** Yellow solid, 34.5

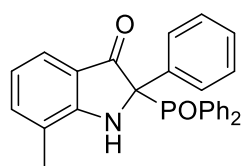

mg, 82% yield.  $^1\text{H NMR}$  (500 MHz, Chloroform-*d*)  $\delta$  8.03–7.95 (m, 2H), 7.84–7.77 (m, 2H), 7.77–7.71 (m, 2H), 7.51 (t,  $J = 7.3$  Hz, 1H), 7.44–7.38 (m, 2H), 7.30–7.35 (m, 2H), 7.24–7.18 (m, 5H), 7.09 (d,  $J = 7.1$  Hz, 1H), 6.60 (t,  $J = 7.5$  Hz, 1H), 6.39 (s, 1H), 2.19 (s, 3H);  $^{13}\text{C NMR}$  (126 MHz, Chloroform-*d*)  $\delta$  196.83, 158.81 (d,  $J = 2.4$  Hz), 137.20, 133.14, 133.04 (d,  $J = 9.1$  Hz), 132.46 (d,  $J = 2.2$  Hz), 132.23 (d,  $J = 2.1$  Hz), 131.92 (d,  $J = 8.8$  Hz), 128.13 (d,  $J = 12.2$  Hz), 128.12 (d,  $J = 1.4$  Hz), 128.05 (d,  $J = 0.64$  Hz), 128.37 (d,  $J = 91.50$  Hz), 127.90 (d,  $J = 11.8$  Hz), 127.56 (d,  $J = 91.09$  Hz), 127.53 (d,  $J = 3.6$  Hz), 121.92, 121.39, 121.37, 119.56, 74.98 (d,  $J = 60.0$  Hz), 15.79;  $^{31}\text{P NMR}$  (202 MHz, Chloroform-*d*)  $\delta$  29.68; **HRMS** (ESI)  $m/z$  calcd for:  $\text{C}_{27}\text{H}_{22}\text{NO}_2\text{PNa}$  [ $\text{M}+\text{Na}$ ] $^+$ : 446.1280, found: 446.1280.

**5-bromo-2-(diphenylphosphoryl)-2-phenylindolin-3-one (3e).** Yellow solid, 22.1

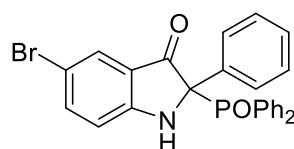

mg, 45% yield.  $^1\text{H NMR}$  (500 MHz, Chloroform-*d*)  $\delta$  8.21 (s, 1H), 7.97 (dd,  $J = 10.7, 8.1$  Hz, 2H), 7.91–7.82 (m, 2H), 7.72 (d,  $J = 7.8$  Hz, 2H), 7.58–7.50 (m, 2H), 7.46–7.38 (m, 3H), 7.31 (dd,  $J = 8.7, 2.0$  Hz, 1H), 7.29–7.27 (m, 2H), 7.21 (t,  $J = 7.2$  Hz, 1H), 7.15 (t,  $J = 7.5$  Hz, 2H), 6.76 (d,  $J = 8.7$  Hz, 1H);  $^{13}\text{C NMR}$  (126 MHz, Chloroform-*d*)  $\delta$  195.66, 158.88 (d,  $J = 3.4$  Hz), 139.84, 133.03 (d,  $J = 9.2$  Hz), 132.57, 132.54 (d,  $J = 2.6$  Hz), 132.46 (d,  $J = 1.9$  Hz), 132.11 (d,  $J = 9.0$  Hz), 130.54 (d,  $J = 93.6$  Hz), 129.24 (d,  $J = 93.0$  Hz), 128.26 (d,  $J = 9.0$  Hz), 128.18, 128.17 (d,  $J = 9.1$  Hz), 128.02 (d,  $J = 1.4$  Hz), 127.47 (d,  $J = 3.5$  Hz), 126.83, 122.58, 113.95, 110.77, 75.80 (d,  $J = 62.2$  Hz);  $^{31}\text{P NMR}$  (202 MHz, Chloroform-*d*)  $\delta$  29.27; **HRMS** (ESI)  $m/z$  calcd for:  $\text{C}_{26}\text{H}_{19}\text{NO}_2\text{PBrNa}$  [ $\text{M}+\text{Na}$ ] $^+$ : 510.0229 ( $^{79}\text{Br}$ ), found: 510.0229.

**6-chloro-2-(diphenylphosphoryl)-2-phenylindolin-3-one (3f).** Yellow solid, 21.0 mg,

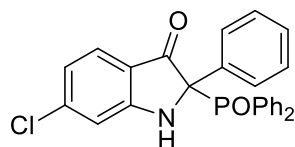

47% yield.  $^1\text{H NMR}$  (500 MHz, DMSO-*d*<sub>6</sub>)  $\delta$  8.92 (s, 1H), 7.84–7.77 (m, 2H), 7.73 (d,  $J = 5.5$  Hz, 2H), 7.66–7.59 (m, 2H), 7.53 (q,  $J = 6.7$  Hz, 2H), 7.48–7.39 (m, 4H), 7.38–7.28 (m, 3H), 7.24 (d,  $J = 8.3$  Hz, 1H), 6.96 (s, 1H), 6.65–6.58 (m, 1H);  $^{13}\text{C NMR}$  (126 MHz, DMSO-*d*<sub>6</sub>)  $\delta$  194.33, 160.96 (d,  $J = 4.5$  Hz), 142.61, 133.47, 133.05 (d,  $J = 8.4$  Hz), 132.91 (d,  $J = 2.3$  Hz), 132.79 (d,  $J = 2.7$  Hz), 132.09 (d,  $J = 8.7$  Hz), 130.31 (d,  $J = 97.6$  Hz), 128.99 (d,  $J = 96.8$  Hz), 128.81 (d,  $J = 11.7$  Hz), 128.60 (d,  $J = 11.2$  Hz), 128.57, 128.44 (d,  $J = 1.5$  Hz), 127.05 (d,  $J = 3.6$  Hz), 126.05, 119.11, 118.65, 112.03, 74.98 (d,  $J = 66.6$  Hz);  $^{31}\text{P NMR}$  (202 MHz, DMSO-*d*<sub>6</sub>)  $\delta$  25.73; **HRMS** (ESI)  $m/z$  calcd for:  $\text{C}_{26}\text{H}_{19}\text{NO}_2\text{PClNa}$  [ $\text{M}+\text{Na}$ ] $^+$ : 466.0734, found: 466.0734.

**2-(diphenylphosphoryl)-3-oxo-2-phenylindoline-5-carbonitrile (3g).** Yellow solid,

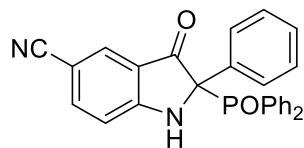

34.0 mg, 78% yield.  $^1\text{H NMR}$  (500 MHz, Chloroform-*d*)  $\delta$  8.00 (dd,  $J = 10.8, 8.0$  Hz, 2H), 7.91–7.82 (m, 2H), 7.80–7.73 (m, 2H), 7.72 (s, 1H), 7.54–7.48 (m, 1H), 7.44–7.39 (m, 3H), 7.34 (t,  $J = 6.9$  Hz, 1H), 7.20 (dd,  $J = 9.9, 4.0$  Hz, 3H), 7.16 (t,  $J = 7.3$  Hz, 2H), 6.84 (d,  $J = 8.3$  Hz, 1H), 6.63 (t,  $J = 7.3$  Hz, 1H);  $^{13}\text{C}$

**NMR** (126 MHz, Chloroform-*d*)  $\delta$  196.88, 160.18 (d,  $J = 3.7$  Hz), 137.36, 133.10 (d,  $J = 2.2$  Hz), 133.08 (d,  $J = 9.2$  Hz), 132.37 (d,  $J = 2.8$  Hz), 132.18 (d,  $J = 3.3$  Hz), 132.17 (d,  $J = 9.0$  Hz), 128.99 (d,  $J = 96.7$  Hz), 128.62 (d,  $J = 98.6$  Hz), 128.12 (d,  $J = 7.5$  Hz), 128.02, 128.02 (d,  $J = 7.1$  Hz), 127.97 (d,  $J = 2.1$  Hz), 127.56 (d,  $J = 3.9$  Hz), 124.53, 121.29, 118.83, 112.31, 112.21, 75.01 (d,  $J = 62.0$  Hz);  **$^{31}\text{P}$  NMR** (202 MHz, Chloroform-*d*)  $\delta$  29.50; **HRMS** (APCI)  $m/z$  calcd for:  $\text{C}_{27}\text{H}_{19}\text{N}_2\text{O}_2\text{P}$   $[\text{M}+\text{H}]^+$ : 435.1257, found: 435.1272.

**2-(diphenylphosphoryl)-2-(4-methoxyphenyl)indolin-3-one (3h)**. Yellow solid, 35.2

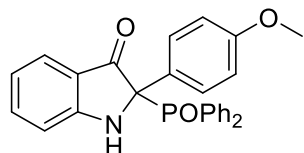

mg, 80% yield.  **$^1\text{H}$  NMR** (500 MHz, Chloroform-*d*)  $\delta$  8.04–7.95 (m, 2H), 7.88–7.80 (m, 2H), 7.68 (d,  $J = 7.5$  Hz, 2H), 7.60 (s, 1H), 7.51 (t,  $J = 7.3$  Hz, 1H), 7.41 (t,  $J = 6.8$  Hz, 3H), 7.34 (t,  $J = 7.3$  Hz, 1H), 7.28–7.18 (m, 3H), 6.84 (d,  $J = 8.3$  Hz, 1H), 6.69 (d,  $J = 8.8$  Hz, 2H), 6.63 (t,  $J = 7.4$  Hz, 1H), 3.71 (s, 3H);  **$^{13}\text{C}$  NMR** (126 MHz, Chloroform-*d*)  $\delta$  197.16, 160.11 (d,  $J = 2.7$  Hz), 159.35, 137.33, 133.08 (d,  $J = 8.6$  Hz), 132.34, 132.15 (d,  $J = 5.7$  Hz), 132.11, 129.04 (d,  $J = 94.2$  Hz), 128.82 (d,  $J = 3.0$  Hz), 128.11 (d,  $J = 10.4$  Hz), 128.02 (d,  $J = 10.0$  Hz), 127.92 (d,  $J = 94.6$  Hz), 125.02, 124.51, 121.30, 118.81, 113.46 – 113.36 (m), 112.36, 74.54 (d,  $J = 63.9$  Hz), 55.18;  **$^{31}\text{P}$  NMR** (202 MHz, Chloroform-*d*)  $\delta$  29.74; **HRMS** (ESI)  $m/z$  calcd for:  $\text{C}_{27}\text{H}_{22}\text{NO}_3\text{PNa}$   $[\text{M}+\text{Na}]^+$ : 462.1230, found: 462.1230.

**2-(diphenylphosphoryl)-2-(4-fluorophenyl)indolin-3-one (3i)**. Yellow solid, 32.1

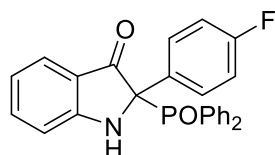

mg, 75% yield.  **$^1\text{H}$  NMR** (500 MHz, Chloroform-*d*)  $\delta$  8.12 (s, 1H), 8.00 (dd,  $J = 11.2, 7.7$  Hz, 2H), 7.94–7.82 (m, 2H), 7.83–7.73 (m, 2H), 7.58–7.50 (m, 1H), 7.49–7.40 (m, 3H), 7.39–7.33 (m, 1H), 7.30–7.20 (m, 3H), 6.88–6.77 (m, 3H), 6.64 (t,  $J = 7.4$  Hz, 1H);  **$^{13}\text{C}$  NMR** (126 MHz, Chloroform-*d*)  $\delta$  196.89, , 162.54 (dd,  $J = 247.2, 2.3$  Hz), 160.28 (d,  $J = 3.7$  Hz), 137.53, 133.04 (d,  $J = 9.1$  Hz), 132.54 (d,  $J = 2.8$  Hz), 132.31 (d,  $J = 2.7$  Hz), 132.09 (d,  $J = 9.1$  Hz), 129.45 (dd,  $J = 8.2, 3.7$  Hz), 128.86 (d,  $J = 3.0$  Hz), 128.78 (d,  $J = 96.5$  Hz), 128.47 (d,  $J = 95.4$  Hz), 128.21 (d,  $J = 9.8$  Hz), 128.11 (d,  $J = 9.5$  Hz), 124.55, 121.11, 118.87, 114.73 (dd,  $J = 21.3, 2.1$  Hz), 112.32, 74.52 (d,  $J = 61.6$  Hz);  **$^{31}\text{P}$  NMR** (202 MHz, Chloroform-*d*)  $\delta$  29.53;  **$^{19}\text{F}$  NMR** (471 MHz, Chloroform-*d*)  $\delta$  -114.10; **HRMS** (ESI)  $m/z$  calcd for:  $\text{C}_{26}\text{H}_{19}\text{NO}_2\text{PFNa}$   $[\text{M}+\text{Na}]^+$ : 450.1030 found: 450.1031.

**2-(4-bromophenyl)-2-(diphenylphosphoryl)indolin-3-one (3j)**. Yellow solid, 33.9

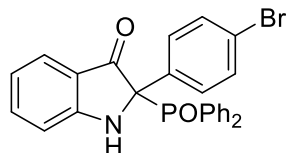

mg, 70% yield.  **$^1\text{H}$  NMR** (500 MHz, Chloroform-*d*)  $\delta$  8.05–7.98 (m, 2H), 7.95 (s, 1H), 7.90–7.84 (m, 2H), 7.63 (dd,  $J = 8.7, 1.9$  Hz, 2H), 7.59–7.53 (m, 1H), 7.49–7.44 (m, 2H), 7.42 (d,  $J = 7.8$  Hz, 1H), 7.40–7.34 (m, 1H), 7.29–7.26 (m, 2H), 7.26–7.22 (m, 3H), 6.80 (d,  $J = 8.3$  Hz, 1H), 6.65 (t,  $J = 7.4$  Hz, 1H);  **$^{13}\text{C}$  NMR** (126 MHz, Chloroform-*d*)  $\delta$  196.52 (d,  $J = 1.0$  Hz), 160.22 (d,  $J = 3.6$  Hz), 137.57, 133.04 (d,  $J = 9.2$  Hz), 132.63 (d,  $J = 2.9$  Hz), 132.36 (d,  $J = 2.8$  Hz), 132.24 (d,  $J = 2.15$  Hz), 132.06 (d,  $J = 9.1$  Hz), 130.97 (d,  $J = 2.1$  Hz), 129.29 (d,  $J =$



3.8 Hz), 128.71 (d,  $J = 99.9$  Hz), 128.36 (d,  $J = 98.4$  Hz), 128.28 (d,  $J = 12.2$  Hz), 128.14 (d,  $J = 11.9$  Hz), 124.58, 122.48 (d,  $J = 3.2$  Hz), 121.08, 118.98, 112.29, 74.64 (d,  $J = 61.0$  Hz);  $^{31}\text{P}$  NMR (202 MHz, Chloroform- $d$ )  $\delta$  29.27; HRMS (ESI)  $m/z$  calcd for:  $\text{C}_{26}\text{H}_{19}\text{NO}_2\text{PBrNa}$   $[\text{M}+\text{Na}]^+$ : 510.0229 ( $^{79}\text{Br}$ ), found: 510.0229.

**2-(diphenylphosphoryl)-2-(naphthalen-2-yl)indolin-3-one (3k).** Yellow solid, 33.1

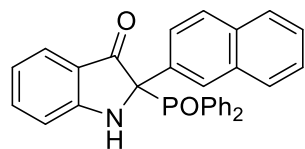

mg, 72% yield.  $^1\text{H}$  NMR (500 MHz, Chloroform- $d$ )  $\delta$  8.19 (s, 1H), 8.05–7.99 (m, 2H), 7.93–7.86 (m, 3H), 7.71 (d,  $J = 8.1$  Hz, 1H), 7.59 (dd,  $J = 23.7, 8.5$  Hz, 3H), 7.52–7.46 (m, 1H), 7.46–7.40 (m, 2H), 7.40–7.31 (m, 4H), 7.26–7.21 (m, 3H), 6.85 (d,  $J = 8.3$  Hz, 1H), 6.68–6.63 (m, 1H);  $^{13}\text{C}$  NMR (126 MHz, Chloroform- $d$ )  $\delta$  196.79, 160.13 (d,  $J = 3.9$  Hz), 137.45, 133.10 (d,  $J = 9.2$  Hz), 132.81 (d,  $J = 1.5$  Hz), 132.75 (d,  $J = 2.1$  Hz), 132.48 (d,  $J = 2.9$  Hz), 132.30 (d,  $J = 2.7$  Hz), 132.22 (d,  $J = 9.1$  Hz), 130.53 (d,  $J = 2.2$  Hz), 128.83 (d,  $J = 96.5$  Hz), 128.58, 128.35 (d,  $J = 99.0$  Hz), 128.19 (d,  $J = 5.3$  Hz), 128.09 (d,  $J = 5.0$  Hz), 127.62 (d,  $J = 1.2$  Hz), 127.31, 127.09 (d,  $J = 5.1$  Hz), 126.28, 125.89, 125.05 (d,  $J = 2.8$  Hz), 124.60, 121.33, 119.04, 112.41, 75.17 (d,  $J = 61.9$  Hz);  $^{31}\text{P}$  NMR (202 MHz, Chloroform- $d$ )  $\delta$  29.92; HRMS (ESI)  $m/z$  calcd for:  $\text{C}_{30}\text{H}_{22}\text{NO}_2\text{PNa}$   $[\text{M}+\text{Na}]^+$ : 482.1280, found: 482.1281.

**2-(tert-butyl)-2-(diphenylphosphoryl)indolin-3-one (3l).** Yellow solid, 25.1 mg, 65%

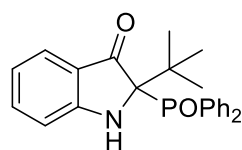

yield.  $^1\text{H}$  NMR (500 MHz, Chloroform- $d$ )  $\delta$  8.50–8.44 (m, 2H), 7.82–7.75 (m, 2H), 7.60–7.50 (m, 3H), 7.25 (d,  $J = 7.8$  Hz, 1H), 7.20–7.12 (m, 2H), 7.11–7.06 (m, 2H), 6.67 (d,  $J = 8.3$  Hz, 1H), 6.52 (t,  $J = 7.3$  Hz, 1H), 6.44 (s, 1H), 1.10 (s, 9H);  $^{13}\text{C}$  NMR (126 MHz, Chloroform- $d$ )  $\delta$  200.00 (d,  $J = 2.4$  Hz), 160.45 (d,  $J = 3.2$  Hz), 136.83, 133.01 (d,  $J = 9.1$  Hz), 132.66 (d,  $J = 91.5$  Hz), 132.18 (d,  $J = 3.0$  Hz), 131.90 (d,  $J = 8.6$  Hz), 131.39 (d,  $J = 2.8$  Hz), 130.52 (d,  $J = 97.3$  Hz), 128.42 (d,  $J = 12.0$  Hz), 127.48 (d,  $J = 11.7$  Hz), 123.93, 122.81, 118.40, 111.43, 78.48 (d,  $J = 60.5$  Hz), 40.72 (d,  $J = 1.6$  Hz), 27.00 (d,  $J = 4.2$  Hz);  $^{31}\text{P}$  NMR (202 MHz, Chloroform- $d$ )  $\delta$  22.82; HRMS (ESI)  $m/z$  calcd for:  $\text{C}_{24}\text{H}_{24}\text{NO}_3\text{PNa}$   $[\text{M}+\text{Na}]^+$ : 412.1437, found: 412.1437.

**2-(bis(4-methoxyphenyl)phosphoryl)-2-phenylindolin-3-one (3m).** Yellow solid,

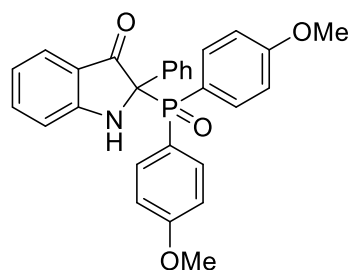

36.6 mg, 78% yield.  $^1\text{H}$  NMR (500 MHz, Chloroform- $d$ )  $\delta$  7.84 (t,  $J = 9.3$  Hz, 2H), 7.72 (d,  $J = 7.7$  Hz, 3H), 7.70 (s, 1H), 7.42 (dd,  $J = 7.9, 1.2$  Hz, 1H), 7.29 (d,  $J = 7.5$  Hz, 1H), 7.19 (d,  $J = 6.8$  Hz, 4H), 6.90 (d,  $J = 7.8$  Hz, 2H), 6.85 (d,  $J = 8.2$  Hz, 1H), 6.71 (d,  $J = 7.6$  Hz, 2H), 6.65 (t,  $J = 7.4$  Hz, 1H), 3.82 (s, 3H), 3.71 (s, 3H);  $^{13}\text{C}$  NMR (126 MHz, Chloroform- $d$ )  $\delta$  197.06, 162.74, 162.50, 160.07, 137.27, 134.93 (d,  $J = 10.2$  Hz), 134.05 (d,  $J = 9.1$  Hz), 133.37, 127.93, 127.92, 127.50 (d,  $J = 1.8$  Hz), 124.54, 124.09 (d,  $J = 98.2$  Hz), 122.71 (d,  $J = 99.3$  Hz), 121.49, 118.90, 113.70 (d,  $J = 9.5$  Hz), 113.60 (d,  $J = 9.6$  Hz), 112.34, 75.07 (d,  $J = 41.2$  Hz), 55.30, 55.25;  $^{31}\text{P}$  NMR (202 MHz, Chloroform- $d$ )  $\delta$  30.32; HRMS (ESI)  $m/z$  calcd for:  $\text{C}_{28}\text{H}_{25}\text{NO}_4\text{P}$   $[\text{M}+\text{H}]^+$ : 470.1516, found: 470.1516.

**2-(bis(benzo[d][1,3]dioxol-4-yl)phosphoryl)-2-phenylindolin-3-one (3n).** Yellow

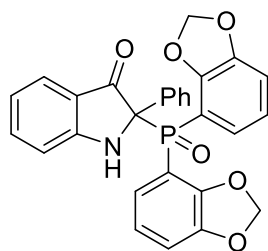

solid 27.2 mg, 55% yield.  $^1\text{H NMR}$  (500 MHz, Chloroform-*d*)  $\delta$  7.80–7.73 (m, 2H), 7.48 (dd,  $J = 11.6, 8.3$  Hz, 1H), 7.46–7.40 (m, 2H), 7.32 (q,  $J = 6.4, 5.6$  Hz, 2H), 7.25–7.17 (m, 4H), 6.88 (d,  $J = 8.3$  Hz, 1H), 6.82 (dd,  $J = 8.0, 2.3$  Hz, 1H), 6.69 (t,  $J = 7.4$  Hz, 1H), 6.66–6.61 (m, 1H), 6.03–5.97 (m, 2H), 5.91–5.84 (m, 2H),  $^{13}\text{C NMR}$  (126 MHz, Chloroform-*d*)  $\delta$  196.90, 160.04 (d,  $J = 3.3$  Hz), 151.17 (d,  $J = 2.6$  Hz), 150.94 (d,  $J = 2.7$  Hz), 147.65 (d,  $J = 9.6$  Hz), 147.50 (d,  $J = 8.9$  Hz), 137.44, 133.24, 128.83 (d,  $J = 9.8$  Hz), 128.11 (d,  $J = 1.9$  Hz), 128.08, 127.84 (d,  $J = 10.1$  Hz), 127.48 (d,  $J = 3.8$  Hz), 124.64, 121.96 (d,  $J = 98.1$  Hz), 121.41, 121.13 (d,  $J = 99.0$  Hz), 119.05, 112.36 (d,  $J = 12.2$  Hz), 112.34, 111.67 (d,  $J = 12.2$  Hz), 108.46 (d,  $J = 15.4$  Hz), 108.29 (d,  $J = 15.0$  Hz), 101.58, 101.50, 75.16 (d,  $J = 62.6$  Hz);  $^{31}\text{P NMR}$  (202 MHz, Chloroform-*d*)  $\delta$  30.32; **HRMS** (ESI)  $m/z$  calcd for:  $\text{C}_{28}\text{H}_{21}\text{NO}_6\text{P}$   $[\text{M}+\text{H}]^+$ : 498.1101, found: 498.1101.

**2-(bis(4-(tert-butyl)phenyl)phosphoryl)-2-phenylindolin-3-one (3o).** Yellow solid

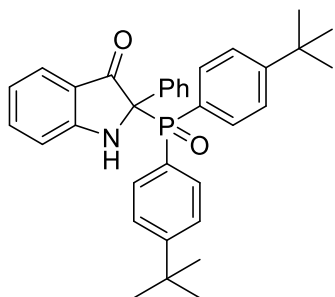

37.9 mg, 73% yield.  $^1\text{H NMR}$  (400 MHz, Chloroform-*d*)  $\delta$  7.89 (t,  $J = 9.3$  Hz, 2H), 7.76 (m, 4H), 7.63 (s, 1H), 7.42 (d,  $J = 7.4$  Hz, 2H), 7.37 (d,  $J = 7.7$  Hz, 1H), 7.18 (dd,  $J = 21.4, 7.1$  Hz, 6H), 6.81 (d,  $J = 8.1$  Hz, 1H), 6.59 (t,  $J = 7.3$  Hz, 1H), 1.31 (s, 9H), 1.18 (s, 9H);  $^{13}\text{C NMR}$  (101 MHz, Chloroform-*d*)  $\delta$  196.92, 160.24, 157.11 – 154.58 (m), 136.99, 133.43 – 133.37 (m), 132.97 (d,  $J = 9.5$  Hz), 132.17 (d,  $J = 9.4$  Hz), 127.88 (d,  $J = 1.6$  Hz), 127.83 (d,  $J = 1.9$  Hz), 127.62 (d,  $J = 3.7$  Hz), 125.73 (d,  $J = 99.5$  Hz), 125.44 (d,  $J = 101.0$  Hz), 125.10 (d,  $J = 12.4$  Hz), 124.93 (d,  $J = 12.0$  Hz), 124.49, 121.46, 118.61, 112.41, 75.19 (d,  $J = 60.8$  Hz), 35.02, 34.85, 31.09, 30.92;  $^{31}\text{P NMR}$  (162 MHz, Chloroform-*d*)  $\delta$  30.03; **HRMS** (ESI)  $m/z$  calcd for:  $\text{C}_{34}\text{H}_{36}\text{NO}_2\text{PBr}_2$   $[\text{M}+\text{H}]^+$ : 522.2556, found: 522.2551.

**2-(di-*p*-tolylphosphoryl)-2-phenylindolin-3-one (3p).** Yellow solid, 35.1 mg, 80%

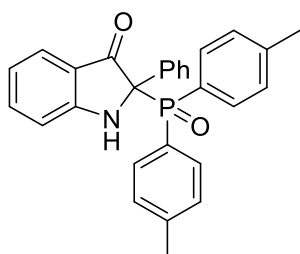

yield.  $^1\text{H NMR}$  (500 MHz, Chloroform-*d*)  $\delta$  7.83 (dd,  $J = 11.0, 7.9$  Hz, 2H), 7.76 (d,  $J = 7.6$  Hz, 2H), 7.71 (dd,  $J = 11.0, 7.9$  Hz, 2H), 7.57 (s, 1H), 7.44 (d,  $J = 7.8$  Hz, 1H), 7.29 (dd,  $J = 15.3, 1.3$  Hz, 1H), 7.26–7.15 (m, 5H), 7.03 (dd,  $J = 8.0, 2.7$  Hz, 2H), 6.85 (d,  $J = 8.3$  Hz, 1H), 6.66 (t,  $J = 7.4$  Hz, 1H), 2.39 (s, 3H), 2.27 (s, 3H);  $^{13}\text{C NMR}$  (126 MHz, Chloroform-*d*)  $\delta$  196.94, 160.13 (d,  $J = 3.4$  Hz), 142.81 (d,  $J = 2.5$  Hz), 142.57 (d,  $J = 2.4$  Hz), 137.21, 133.32, 133.02 (d,  $J = 9.4$  Hz), 132.13 (d,  $J = 9.3$  Hz), 128.85 (d,  $J = 7.9$  Hz), 128.75 (d,  $J = 7.7$  Hz), 127.90, 127.88, 127.56 (d,  $J = 3.5$  Hz), 125.86 (d,  $J = 99.9$  Hz), 125.44 (d,  $J = 100.8$  Hz), 124.53, 121.38, 118.70, 112.32, 75.03 (d,  $J = 61.1$  Hz), 21.67, 21.47;  $^{31}\text{P NMR}$  (202 MHz, Chloroform-*d*)  $\delta$  30.35; **HRMS** (ESI)  $m/z$  calcd for:  $\text{C}_{28}\text{H}_{25}\text{NO}_2\text{P}$   $[\text{M}+\text{H}]^+$ : 438.1617, found: 438.1623.

**2-((2,4-dimethylphenyl)(3,5-dimethylphenyl)phosphoryl)-2-phenylindolin-3-one**

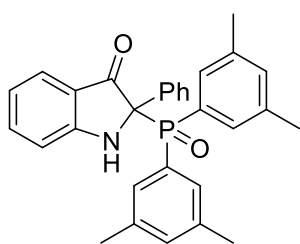

**(3q).** Yellow solid, 37.0 mg, 80% yield.  $^1\text{H NMR}$  (400 MHz, Chloroform-*d*)  $\delta$  7.78–7.67 (m, 2H), 7.45 (d,  $J = 9.7$  Hz, 3H), 7.38 (d,  $J = 11.5$  Hz, 2H), 7.27 (d,  $J = 9.4$  Hz, 3H), 7.11 (s, 2H), 7.04 (s, 1H), 6.95 (s, 1H), 6.83 (d,  $J = 8.0$  Hz, 1H), 6.66 (t,  $J = 7.0$  Hz, 1H), 2.28 (s, 6H), 2.13 (s, 6H);  $^{13}\text{C NMR}$  (101 MHz, Chloroform-*d*)  $\delta$  196.59, 159.87, 137.72 (d,  $J = 8.3$  Hz), 137.59 (d,  $J = 8.8$  Hz), 137.06, 134.09 (d,  $J = 2.4$  Hz), 133.83 (d,  $J = 2.5$  Hz), 133.24, 130.65 (d,  $J = 9.1$  Hz), 129.83 (d,  $J = 8.9$  Hz), 128.47 (d,  $J = 94.8$  Hz), 127.91 (d,  $J = 97.8$  Hz), 127.92 (d,  $J = 1.8$  Hz), 127.84–127.76 (m), 127.61 (d,  $J = 3.4$  Hz), 124.40, 121.92, 119.02, 112.28, 74.85 (d,  $J = 59.8$  Hz), 21.14, 21.10;  $^{31}\text{P NMR}$  (162 MHz, Chloroform-*d*)  $\delta$  31.24; **HRMS** (ESI)  $m/z$  calcd for:  $\text{C}_{30}\text{H}_{29}\text{NO}_2\text{P}$   $[\text{M}+\text{H}]^+$ : 466.1930, found: 466.1932.

**2-(di-*m*-tolylphosphoryl)-2-phenylindolin-3-one (3r).** Yellow solid, 34.8 mg, 80%

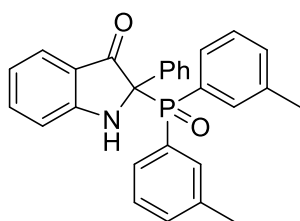

yield.  $^1\text{H NMR}$  (500 MHz, Chloroform-*d*)  $\delta$  7.78 (dd,  $J = 8.3$ , 2.9 Hz, 1H), 7.76–7.70 (m, 2H), 7.66 (dd,  $J = 11.6$ , 5.6 Hz, 2H), 7.62–7.53 (m, 1H), 7.43 (d,  $J = 7.7$  Hz, 1H), 7.34–7.29 (m, 3H), 7.28 (s, 1H), 7.19 (q,  $J = 7.9$ , 6.5 Hz, 3H), 7.16–7.09 (m, 2H), 6.83 (d,  $J = 8.3$  Hz, 1H), 6.65 (t,  $J = 7.4$  Hz, 1H), 2.31 (s, 3H), 2.16 (s, 3H);  $^{13}\text{C NMR}$  (126 MHz, Chloroform-*d*)  $\delta$  196.72, 160.00 (d,  $J = 3.5$  Hz), 137.91 (d,  $J = 1.7$  Hz), 137.82 (d,  $J = 1.6$  Hz), 137.19, 133.59 (d,  $J = 8.6$  Hz), 133.17 (d,  $J = 2.0$  Hz), 133.13 (d,  $J = 3.0$  Hz), 132.91 (d,  $J = 2.9$  Hz), 132.79 (d,  $J = 8.6$  Hz), 130.06 (d,  $J = 9.8$  Hz), 129.16 (d,  $J = 9.7$  Hz), 128.73 (d,  $J = 95.9$  Hz), 128.25 (d,  $J = 96.4$  Hz), 127.95 (d,  $J = 2.2$  Hz), 127.87 (d,  $J = 2.0$  Hz), 127.84, 127.57 (d,  $J = 3.9$  Hz), 124.48, 121.62, 118.92, 112.27, 74.92 (d,  $J = 60.8$  Hz), 21.40, 21.22;  $^{31}\text{P NMR}$  (202 MHz, Chloroform-*d*)  $\delta$  30.31; **HRMS** (ESI)  $m/z$  calcd for:  $\text{C}_{28}\text{H}_{25}\text{NO}_2\text{P}$   $[\text{M}+\text{H}]^+$ : 438.1617, found: 438.1621.

**2-((4-fluoro-3-methylphenyl)(3-fluoro-4-methylphenyl)phosphoryl)-2-**

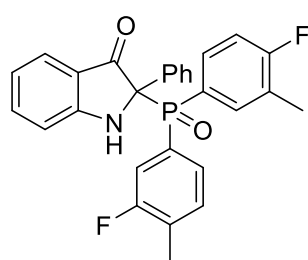

**phenylindolin-3-one (3s).** Yellow solid 36.0 mg, 76% yield.  $^1\text{H NMR}$  (500 MHz, Chloroform-*d*)  $\delta$  7.84 (s, 1H), 7.78 (d,  $J = 7.7$  Hz, 2H), 7.70–7.59 (m, 2H), 7.52–7.43 (m, 3H), 7.30 (t,  $J = 7.3$  Hz, 1H), 7.25–7.17 (m, 4H), 7.05 (q,  $J = 7.3$  Hz, 1H), 6.86 (d,  $J = 8.3$  Hz, 1H), 6.67 (t,  $J = 7.4$  Hz, 1H), 2.30 (s, 3H), 2.18 (s, 3H);  $^{13}\text{C NMR}$  (126 MHz, Chloroform-*d*)  $\delta$  196.73, 161.71 (dd,  $J = 17.3$ , 13.3 Hz), 160.25 (d,  $J = 4.1$  Hz), 159.74 (dd,  $J = 17.3$ , 14.0 Hz), 137.59, 132.75 (d,  $J = 2.0$  Hz), 131.57 (t,  $J = 4.9$  Hz), 131.46 (t,  $J = 4.7$  Hz), 130.21 (dd,  $J = 17.1$ , 2.5 Hz), 130.00 (dd,  $J = 17.2$ , 2.6 Hz), 128.58 (d,  $J = 3.6$  Hz), 128.51 (d,  $J = 3.6$  Hz), 128.28 (dd,  $J = 97.8$ , 6.0 Hz), 128.24 (d,  $J = 2.1$  Hz), 128.10 (d,  $J = 1.9$  Hz), 127.78 (dd,  $J = 100.6$ , 6.1 Hz), 127.50 (d,  $J = 3.8$  Hz), 124.60, 121.09, 119.46 (dd,  $J = 24.5$ , 10.4 Hz), 118.95, 118.72 (dd,  $J = 24.1$ , 10.1 Hz), 112.36, 74.96 (d,  $J = 64.9$  Hz), 14.84 (d,  $J = 3.6$  Hz), 14.63 (d,  $J = 3.4$  Hz);  $^{31}\text{P NMR}$  (202 MHz, Chloroform-*d*)  $\delta$  27.70;  $^{19}\text{F NMR}$  (471 MHz, Chloroform-*d*)  $\delta$  -

115.64, -115.72; **HRMS** (ESI)  $m/z$  calcd for:  $C_{28}H_{23}NO_2PF_2 [M+H]^+$ : 474.1429, found: 474.1428.

**2-(bis(4-fluorophenyl)phosphoryl)-2-phenylindolin-3-one (3t)**. Yellow solid 31.5

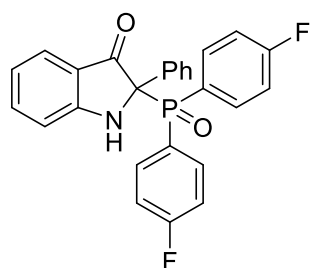

mg, 71% yield.  $^1H$  NMR (500 MHz, Chloroform-*d*)  $\delta$  8.09 – 8.00 (m, 2H), 7.91 – 7.81 (m, 2H), 7.77 (d,  $J = 7.2$  Hz, 3H), 7.45 (d,  $J = 7.8$  Hz, 1H), 7.33 (t,  $J = 7.7$  Hz, 1H), 7.27 – 7.18 (m, 2H), 7.17 – 7.10 (m, 2H), 6.94 (t,  $J = 8.4$  Hz, 2H), 6.86 (d,  $J = 8.3$  Hz, 1H), 6.70 (t,  $J = 7.4$  Hz, 1H);  $^{13}C$  NMR (126 MHz, Chloroform-*d*)  $\delta$  197.00 (d,  $J = 1.2$  Hz), 166.30 (dd,  $J = 30.4, 3.4$  Hz), 164.28 (dd,  $J = 30.4, 3.4$  Hz), 160.23 (d,  $J = 4.0$  Hz), 137.74, 135.61 (dd,  $J = 10.6, 9.0$  Hz), 134.69 (dd,  $J = 10.4, 9.1$  Hz), 132.80 (d,  $J = 2.1$  Hz), 128.28 (d,  $J = 2.4$  Hz), 128.13 (d,  $J = 2.0$  Hz), 127.48 (d,  $J = 4.1$  Hz), 124.77 (dd,  $J = 100.0, 3.3$  Hz), 124.58, 124.34 (dd,  $J = 102.5, 3.3$  Hz), 121.07, 119.09, 115.84 – 115.61 (m), 115.60 – 115.37 (m), 112.24, 75.05 (d,  $J = 64.1$  Hz);  $^{31}P$  NMR (202 MHz, Chloroform-*d*)  $\delta$  28.45;  $^{19}F$  NMR (471 MHz, Chloroform-*d*)  $\delta$  -105.29, -105.52; **HRMS** (ESI)  $m/z$  calcd for:  $C_{26}H_{18}NO_2PBr_2 [M+H]^+$ : 446.1116, found: 446.1118.

**2-(bis(4-chlorophenyl)phosphoryl)-2-phenylindolin-3-one (3u)**. Yellow solid, 34.2

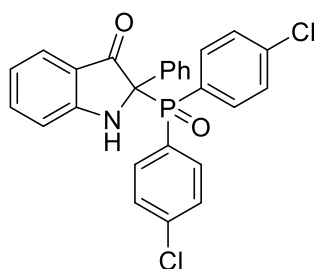

mg, 72% yield.  $^1H$  NMR (400 MHz, Chloroform-*d*)  $\delta$  8.22 (s, 1H), 7.99–7.90 (m, 2H), 7.76 (t,  $J = 6.6$  Hz, 4H), 7.48–7.38 (m, 3H), 7.36–7.28 (m, 1H), 7.27–7.20 (m, 3H), 7.17 (d,  $J = 7.6$  Hz, 2H), 6.85 (d,  $J = 8.3$  Hz, 1H), 6.68 (t,  $J = 7.4$  Hz, 1H);  $^{13}C$  NMR (101 MHz, Chloroform-*d*)  $\delta$  196.90, 160.42 (d,  $J = 4.2$  Hz), 139.36 (d,  $J = 3.5$  Hz), 139.17 (d,  $J = 3.5$  Hz), 137.88, 134.41 (d,  $J = 10.1$  Hz), 133.46 (d,  $J = 10.0$  Hz), 132.63 (d,  $J = 1.7$  Hz), 128.66 (d,  $J = 8.5$  Hz), 128.54 (d,  $J = 8.3$  Hz), 128.40 (d,  $J = 2.0$  Hz), 128.19 (d,  $J = 1.6$  Hz), 127.56 (d,  $J = 4.0$  Hz), 127.31 (d,  $J = 98.4$  Hz), 126.98 (d,  $J = 100.5$  Hz), 124.64, 120.91, 119.08, 112.34, 75.05 (d,  $J = 64.9$  Hz);  $^{31}P$  NMR (162 MHz, Chloroform-*d*)  $\delta$  28.72; **HRMS** (ESI)  $m/z$  calcd for:  $C_{26}H_{19}NO_2PCl_2 [M+H]^+$ : 478.0525, found: 478.0521.

**2-(bis(4-bromophenyl)phosphoryl)-2-phenylindolin-3-one (3v)**. Yellow solid 44.1

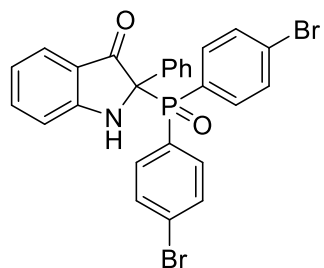

mg, 78% yield.  $^1H$  NMR (500 MHz, Chloroform-*d*)  $\delta$  7.83 (dd,  $J = 10.7, 8.5$  Hz, 2H), 7.73 (d,  $J = 7.8$  Hz, 2H), 7.70 (s, 1H), 7.65 (dd,  $J = 10.7, 8.5$  Hz, 2H), 7.56 (dd,  $J = 8.4, 2.3$  Hz, 2H), 7.44 (d,  $J = 7.7$  Hz, 1H), 7.36 (d,  $J = 6.5$  Hz, 2H), 7.35–7.29 (m, 1H), 7.24 (d,  $J = 7.0$  Hz, 1H), 7.20 (t,  $J = 7.4$  Hz, 2H), 6.84 (d,  $J = 8.3$  Hz, 1H), 6.70 (t,  $J = 7.4$  Hz, 1H);  $^{13}C$  NMR (126 MHz, Chloroform-*d*)  $\delta$  196.73, 160.16 (d,  $J = 3.8$  Hz), 137.89, 134.43 (d,  $J = 10.0$  Hz), 133.48 (d,  $J = 9.8$  Hz), 132.57 (d,  $J = 1.8$  Hz), 131.58 (d,  $J = 12.6$  Hz), 131.47 (d,  $J = 12.1$  Hz), 128.44 (d,  $J = 2.5$  Hz), 128.24 (d,  $J = 1.6$  Hz), 128.10 (d,  $J = 3.5$  Hz), 127.86 (d,  $J = 3.5$  Hz), 127.67 (d,  $J = 99.1$  Hz),

127.46 (d,  $J = 4.0$  Hz), 127.32 (d,  $J = 99.7$  Hz), 124.67, 121.04, 119.29, 112.30, 74.85 (d,  $J = 64.4$  Hz);  **$^{31}\text{P}$  NMR** (202 MHz, Chloroform-*d*)  $\delta$  28.98; **HRMS** (ESI)  $m/z$  calcd for:  $\text{C}_{26}\text{H}_{19}\text{NO}_2\text{PBr}_2$  [ $\text{M}+\text{H}$ ] $^+$ : 565.9515 ( $^{79}\text{Br}$ ), found: 565.9520.

**2-(bis(4-(trifluoromethyl)phenyl)phosphoryl)-2-phenylindolin-3-one (3w).** Yellow

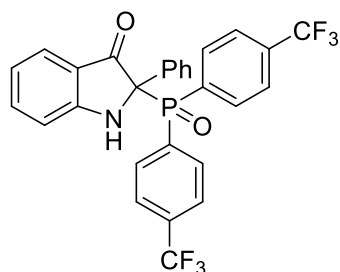

solid 40.4 mg, 74% yield.  **$^1\text{H}$  NMR** (500 MHz, Chloroform-*d*)  $\delta$  8.17 (dd,  $J = 10.7, 8.5$  Hz, 2H), 7.94 (dd,  $J = 10.6, 8.5$  Hz, 2H), 7.77–7.72 (m, 2H), 7.70 (dd,  $J = 8.3, 2.1$  Hz, 3H), 7.49 (d,  $J = 6.4$  Hz, 2H), 7.44 (d,  $J = 7.8$  Hz, 1H), 7.37–7.30 (m, 1H), 7.25–7.18 (m, 2H), 6.85 (d,  $J = 8.3$  Hz, 1H), 6.71 (t,  $J = 7.4$  Hz, 1H);  **$^{13}\text{C}$  NMR** (126 MHz, Chloroform-*d*)  $\delta$  196.52 (d,  $J = 1.6$  Hz), 160.09 (d,  $J = 4.3$

Hz), 138.09, 134.75–134.34 (m), 133.82–133.22 (m), 133.53 (d,  $J = 9.7$  Hz), 132.75 (d,  $J = 94.4$  Hz), 132.61 (d,  $J = 9.5$  Hz), 132.48 (d,  $J = 96.4$  Hz), 132.25 (d,  $J = 2.1$  Hz), 128.70 (d,  $J = 2.4$  Hz), 128.39 (d,  $J = 2.2$  Hz), 127.60 – 127.29 (m), 125.32 – 124.83 (m), 124.73, 123.34 (qd,  $J = 272.3$  Hz), 121.00, 119.57, 112.29, 74.84 (d,  $J = 64.9$  Hz);  **$^{31}\text{P}$  NMR** (202 MHz, Chloroform-*d*)  $\delta$  27.66;  **$^{19}\text{F}$  NMR** (471 MHz, Chloroform-*d*)  $\delta$  -63.33, -63.54; **HRMS** (ESI)  $m/z$  calcd for:  $\text{C}_{28}\text{H}_{19}\text{NO}_2\text{PF}_6$  [ $\text{M}+\text{H}$ ] $^+$ : 546.1052, found: 546.1048.

**2-(bis(3-(trifluoromethyl)phenyl)phosphoryl)-2-phenylindolin-3-one (3x).** Yellow

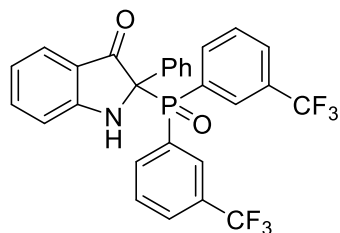

solid 42.5 mg, 78% yield.  **$^1\text{H}$  NMR** (500 MHz, Chloroform-*d*)  $\delta$  8.29–8.22 (m, 2H), 8.16 (d,  $J = 11.3$  Hz, 1H), 7.95–7.88 (m, 1H), 7.80 (s, 1H), 7.76–7.70 (m, 2H), 7.66–7.57 (m, 2H), 7.4 – 7.38 (m, 2H), 7.35 (s, 1H), 7.35–7.31 (m, 1H), 7.25–7.17 (m, 3H), 6.85 (d,  $J = 8.3$  Hz, 1H), 6.72–6.66 (m, 1H);  **$^{13}\text{C}$  NMR** (126 MHz, Chloroform-*d*)  $\delta$

196.47 (d,  $J = 1.3$  Hz), 159.90 (d,  $J = 4.1$  Hz), 138.03, 136.13 (d,  $J = 9.6$  Hz), 135.13 (d,  $J = 9.4$  Hz), 132.09 (d,  $J = 2.1$  Hz), 130.11 (dd,  $J = 9.8, 3.8$  Hz), 131.02 (d,  $J = 12.4$  Hz), 130.76 (d,  $J = 12.4$  Hz), 129.84 (d,  $J = 96.0$  Hz), 129.41 – 129.30 (m), 129.30 (d,  $J = 96.0$  Hz), 129.25 – 129.17 (m), 129.08 (dd,  $J = 9.5, 3.9$  Hz), 128.87 (d,  $J = 5.6$  Hz), 128.78 (d,  $J = 5.2$  Hz), 128.64 (d,  $J = 2.5$  Hz), 128.37 (d,  $J = 2.1$  Hz), 127.30 (d,  $J = 4.3$  Hz), 123.42 (qd,  $J = 273.2, 27.2$  Hz), 124.66, 121.15, 119.64, 112.28, 74.78 (d,  $J = 64.5$  Hz);  **$^{31}\text{P}$  NMR** (202 MHz, Chloroform-*d*)  $\delta$  27.51;  **$^{19}\text{F}$  NMR** (471 MHz, Chloroform-*d*)  $\delta$  -62.94, -62.98; **HRMS** (ESI)  $m/z$  calcd for:  $\text{C}_{28}\text{H}_{19}\text{NO}_2\text{PF}_6$  [ $\text{M}+\text{H}$ ] $^+$ : 546.1052, found: 546.1050.

**2-(bis(3,5-bis(trifluoromethyl)phenyl)phosphoryl)-2-phenylindolin-3-one (3y).**

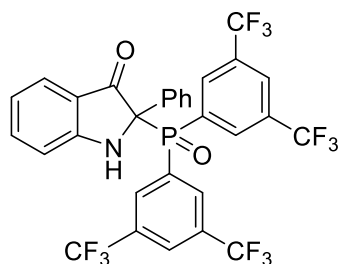

Yellow solid 55.4 mg, 81% yield.  **$^1\text{H}$  NMR** (500 MHz, Chloroform-*d*)  $\delta$  8.51 (d,  $J = 11.0$  Hz, 2H), 8.29 (d,  $J = 10.9$  Hz, 2H), 8.07 (s, 1H), 7.90 (s, 2H), 7.79–7.72 (m, 2H), 7.48 (d,  $J = 7.8$  Hz, 1H), 7.43–7.34 (m, 1H), 7.30–7.27 (m, 1H), 7.20 (t,  $J = 7.7$  Hz, 2H), 6.85 (d,  $J = 8.3$  Hz, 1H), 6.75 (t,  $J = 7.4$  Hz, 1H);  **$^{13}\text{C}$  NMR** (126 MHz, Chloroform-*d*)  $\delta$

196.19 (d,  $J = 2.0$  Hz), 160.08 (d,  $J = 4.8$  Hz), 138.63, 133.21 (dd,  $J = 9.5, 3.2$  Hz), 132.73 – 131.59 (m), 131.15(d,  $J = 95.2$  Hz), 131.07 (d,  $J = 2.3$  Hz), 130.60 (d,  $J = 98.0$  Hz), 129.22 (d,  $J = 2.6$  Hz), 128.70 (d,  $J = 2.2$  Hz), 127.17 (d,  $J = 4.5$  Hz), 126.80 – 126.38 (m), 124.83, 122.53 (qd,  $J = 272.9, 33.2$  Hz), 120.82, 120.17, 112.33, 74.79 (d,  $J = 68.0$  Hz);  $^{31}\text{P}$  NMR (202 MHz, Chloroform- $d$ )  $\delta$  27.61;  $^{19}\text{F}$  NMR (471 MHz, Chloroform- $d$ )  $\delta$  -63.14, -63.20; HRMS (ESI)  $m/z$  calcd for:  $\text{C}_{30}\text{H}_{17}\text{NO}_2\text{PF}_{12}$   $[\text{M}+\text{H}]^+$ : 682.0800, found: 682.0798.

**2-phenyl-2-(phenyl(propyl)phosphoryl)indolin-3-one (3z).** Yellow solid 20.7 mg, 53%

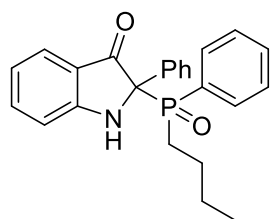

yield, mixture of diastereomer (1:1 dr).  $^1\text{H}$  NMR (500 MHz, Chloroform- $d$ )  $\delta$  8.02 (d,  $J = 7.8$  Hz, 2H), 7.70–7.64 (m, 2H), 7.62 (d,  $J = 7.7$  Hz, 1H), 7.57 (d,  $J = 8.1$  Hz, 2H), 7.53 (d,  $J = 8.4$  Hz, 1H), 7.48 (q,  $J = 7.2$  Hz, 4H), 7.42 (t,  $J = 7.5$  Hz, 2H), 7.40–7.34 (m, 4H), 7.29 (s, 2H), 7.22–7.18 (m, 2H), 7.16 (t, 2H), 7.11 (t,  $J = 7.4$  Hz, 2H), 7.07 (d,  $J = 8.2$  Hz, 1H), 6.84 (t,  $J = 7.4$

Hz, 1H), 6.71 (d,  $J = 8.3$  Hz, 1H), 6.54 (t,  $J = 7.4$  Hz, 1H), 2.07–1.88 (m, 4H), 1.40–1.29 (m, 4H), 1.29–1.20 (m, 4H), 0.80 (t,  $J = 7.1$  Hz, 3H), 0.73 (t,  $J = 7.2$  Hz, 3H);  $^{13}\text{C}$  NMR (126 MHz, Chloroform- $d$ )  $\delta$  196.76, 196.71, 160.18 (d,  $J = 3.1$  Hz), 159.97 (d,  $J = 2.9$  Hz), 137.69, 137.10, 132.92 (d,  $J = 1.9$  Hz), 132.77 (d,  $J = 1.8$  Hz), 132.51 (d,  $J = 8.7$  Hz), 132.39 (d,  $J = 1.9$  Hz), 132.12 (d,  $J = 8.8$  Hz), 132.07 (d,  $J = 1.4$  Hz), 128.52 (d,  $J = 1.4$  Hz), 128.30 (d,  $J = 1.8$  Hz), 128.09 (d,  $J = 82.6$  Hz), 128.03 (d,  $J = 11.9$  Hz), 127.89 (d,  $J = 11.4$  Hz), 127.74 (d,  $J = 1.8$  Hz), 127.68 (d,  $J = 1.1$  Hz), 127.37 (d,  $J = 80.5$  Hz), 127.35 (d,  $J = 3.2$  Hz), 126.75 (d,  $J = 2.8$  Hz), 124.82, 124.24, 121.32, 121.02, 119.17, 118.61, 112.80, 112.11, 73.99 (d,  $J = 65.7$  Hz), 73.92 (d,  $J = 64.8$  Hz), 24.08 (d,  $J = 8.5$  Hz), 23.96 (d,  $J = 7.5$  Hz), 23.95 (d,  $J = 66.2$  Hz), 23.40 (d,  $J = 4.2$  Hz), 22.84 (d,  $J = 4.2$  Hz), 22.71 (d,  $J = 67.6$  Hz), 13.57, 13.53;  $^{31}\text{P}$  NMR (202 MHz, Chloroform- $d$ )  $\delta$  42.95, 41.86; HRMS (ESI)  $m/z$  calcd for:  $\text{C}_{24}\text{H}_{25}\text{NO}_2\text{P}$   $[\text{M}+\text{H}]^+$ : 390.1617, found: 390.1616.

**2-(dimethylphosphoryl)-2-phenylindolin-3-one (3aa).** Yellow solid 23.1 mg, 81%

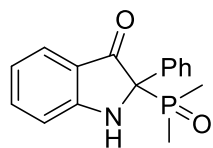

yield.  $^1\text{H}$  NMR (500 MHz, DMSO- $d_6$ )  $\delta$  8.84 (s, 1H), 7.85–7.80 (m, 2H), 7.5–7.51 (m, 1H), 7.48 (d,  $J = 7.8$  Hz, 1H), 7.42 (t,  $J = 7.6$  Hz, 2H), 7.38–7.33 (m, 1H), 7.09 (d,  $J = 8.3$  Hz, 1H), 6.82–6.75 (m, 1H), 1.35 (d,  $J = 13.0$  Hz, 3H), 1.26 (d,  $J = 12.5$  Hz, 3H);  $^{13}\text{C}$  NMR (126

MHz, DMSO- $d_6$ )  $\delta$  195.99, 160.89 (d,  $J = 4.0$  Hz), 138.25, 133.79 (d,  $J = 1.1$  Hz), 128.60 (d,  $J = 1.8$  Hz), 128.36 (d,  $J = 2.1$  Hz), 126.83 (d,  $J = 3.5$  Hz), 124.63, 119.73, 118.68, 112.73, 73.75 (d,  $J = 60.8$  Hz), 12.90 (d,  $J = 90.4$  Hz), 12.37 (d,  $J = 89.4$  Hz);  $^{31}\text{P}$  NMR (162 MHz, Chloroform- $d$ )  $\delta$  48.58; HRMS (ESI)  $m/z$  calcd for:  $\text{C}_{16}\text{H}_{16}\text{NO}_2\text{P}$   $[\text{M}+\text{H}]^+$ : 286.0991, found: 286.0993.

**ethyl (3-oxo-2-phenylindolin-2-yl)(phenyl)phosphinate (3ab)**. Yellow solid 24.6 mg,

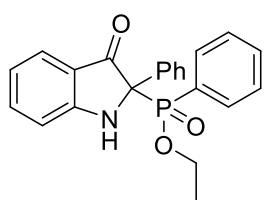

65% yield, mixture of diastereomer (1:1 dr).  $^1\text{H NMR}$  (500 MHz, Chloroform-*d*)  $\delta$  8.01 (d,  $J = 7.8$  Hz, 2H), 7.71 (dd,  $J = 10.9, 7.9$  Hz, 2H), 7.59 (q,  $J = 5.6, 4.2$  Hz, 6H), 7.53 (t,  $J = 7.5$  Hz, 1H), 7.45–7.40 (m, 1H), 7.40–7.31 (m, 7H), 7.25–7.15 (m, 6H), 6.98 (d,  $J = 8.2$  Hz, 1H), 6.83–6.77 (m, 3H), 6.59 (t,  $J = 7.3$  Hz, 1H), 4.07–3.98 (m, 4H), 1.29 (t,  $J = 7.0$  Hz, 3H), 1.08 (t,  $J = 7.0$  Hz, 3H);  $^{13}\text{C NMR}$  (126 MHz, Chloroform-*d*)  $\delta$  195.49, 195.08, 159.84 (d,  $J = 3.3$  Hz), 159.63 (d,  $J = 3.9$  Hz), 137.09, 136.97, 133.66 (d,  $J = 9.4$  Hz), 133.18 (d,  $J = 9.4$  Hz), 133.02 (d,  $J = 2.7$  Hz), 132.87, 132.83, 132.73 (d,  $J = 2.6$  Hz), 128.21 (d,  $J = 2.1$  Hz), 128.15 (d,  $J = 2.4$  Hz), 128.01 (d,  $J = 1.8$  Hz), 127.93 (d,  $J = 3.1$  Hz), 127.90 (d,  $J = 1.8$  Hz), 127.88 (d,  $J = 2.3$  Hz), 127.43 (d,  $J = 85.4$  Hz), 127.31 (d,  $J = 3.7$  Hz), 126.90 (d,  $J = 4.2$  Hz), 126.41 (d,  $J = 83.5$  Hz), 124.90, 124.59, 121.24, 120.87, 119.24, 118.93, 112.44, 112.07, 73.49 (d,  $J = 94.8$  Hz), 73.29 (d,  $J = 91.8$  Hz), 63.05 (d,  $J = 7.6$  Hz), 62.65 (d,  $J = 7.3$  Hz), 16.44 (d,  $J = 5.4$  Hz), 16.30 (d,  $J = 5.7$  Hz);  $^{31}\text{P NMR}$  (202 MHz, Chloroform-*d*)  $\delta$  36.21, 30.45; **HRMS** (ESI)  $m/z$  calcd for:  $\text{C}_{22}\text{H}_{21}\text{NO}_3\text{P}$   $[\text{M}+\text{H}]^+$ : 378.1254, found: 378.1255.

**diethyl (3-oxo-2-phenylindolin-2-yl)phosphonate(3ac)**. Yellow solid 22.5 mg, 65%

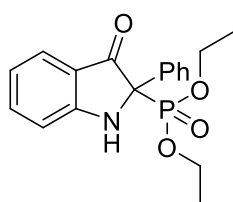

yield.  $^1\text{H NMR}$  (500 MHz, Chloroform-*d*)  $\delta$  8.00–7.87 (m, 2H), 7.62 (d,  $J = 7.7$  Hz, 1H), 7.50–7.42 (m, 1H), 7.37 (t,  $J = 7.5$  Hz, 2H), 7.34–7.29 (m, 1H), 6.99 (d,  $J = 8.2$  Hz, 1H), 6.84 (t,  $J = 7.4$  Hz, 1H), 6.17 (s, 1H), 4.13–4.02 (m, 2H), 4.01–3.86 (m, 2H), 1.19 (t,  $J = 7.1$  Hz, 3H), 1.07 (t,  $J = 7.0$  Hz, 3H);  $^{13}\text{C NMR}$  (126 MHz, Chloroform-*d*)  $\delta$  194.67 (d,  $J = 4.0$  Hz), 159.80 (d,  $J = 4.5$

Hz), 137.29, 133.44 (d,  $J = 2.9$  Hz), 128.34 (d,  $J = 2.6$  Hz), 128.26 (d,  $J = 3.0$  Hz), 126.80 (d,  $J = 4.9$  Hz), 125.19, 120.62, 119.56, 112.53, 71.52 (d,  $J = 144.6$  Hz), 64.59 (d,  $J = 7.7$  Hz), 64.33 (d,  $J = 7.3$  Hz), 16.23 (d,  $J = 5.9$  Hz), 16.18 (d,  $J = 5.9$  Hz);  $^{31}\text{P NMR}$  (202 MHz, Chloroform-*d*)  $\delta$  15.86; **HRMS** (ESI)  $m/z$  calcd for:  $\text{C}_{18}\text{H}_{20}\text{NO}_4\text{P}$   $[\text{M}+\text{H}]^+$ : 346.1203, found: 346.1204.

**dimethyl (3-oxo-2-phenylindolin-2-yl)phosphonate(3ad)**. Yellow solid 20.3 mg, 64%

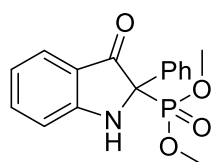

yield.  $^1\text{H NMR}$  (500 MHz, Chloroform-*d*)  $\delta$  7.95–7.89 (m, 2H), 7.67–7.62 (m, 1H), 7.51–7.46 (m, 1H), 7.39 (t,  $J = 7.6$  Hz, 2H), 7.36–7.31 (m, 1H), 7.00 (d,  $J = 8.2$  Hz, 1H), 6.87 (t,  $J = 7.4$  Hz, 1H), 3.66 (dd,  $J = 17.4, 10.7$  Hz, 6H);  $^{13}\text{C NMR}$  (126 MHz, Chloroform-*d*)  $\delta$  194.53 (d,  $J = 3.8$  Hz), 159.69 (d,  $J = 4.9$  Hz), 137.50, 133.18

(d,  $J = 3.1$  Hz), 128.53 (d,  $J = 2.7$  Hz), 128.46 (d,  $J = 3.0$  Hz), 126.67 (d,  $J = 4.9$  Hz), 125.33, 120.35 (d,  $J = 1.9$  Hz), 119.75, 112.60, 71.27 (d,  $J = 146.7$  Hz), 54.96 (d,  $J = 7.5$  Hz), 54.71 (d,  $J = 7.3$  Hz), 50.85 (s, MeOH);  $^{31}\text{P NMR}$  (202 MHz, Chloroform-*d*)  $\delta$  18.46; **HRMS** (ESI)  $m/z$  calcd for:  $\text{C}_{16}\text{H}_{17}\text{NO}_4\text{P}$   $[\text{M}+\text{H}]^+$ : 318.0890, found: 318.0887.

## 5. Single Crystal X-ray Structure Determinations of Compounds

Single crystal X-ray structure determinations of compound 3ac (CCDC: 2159691)

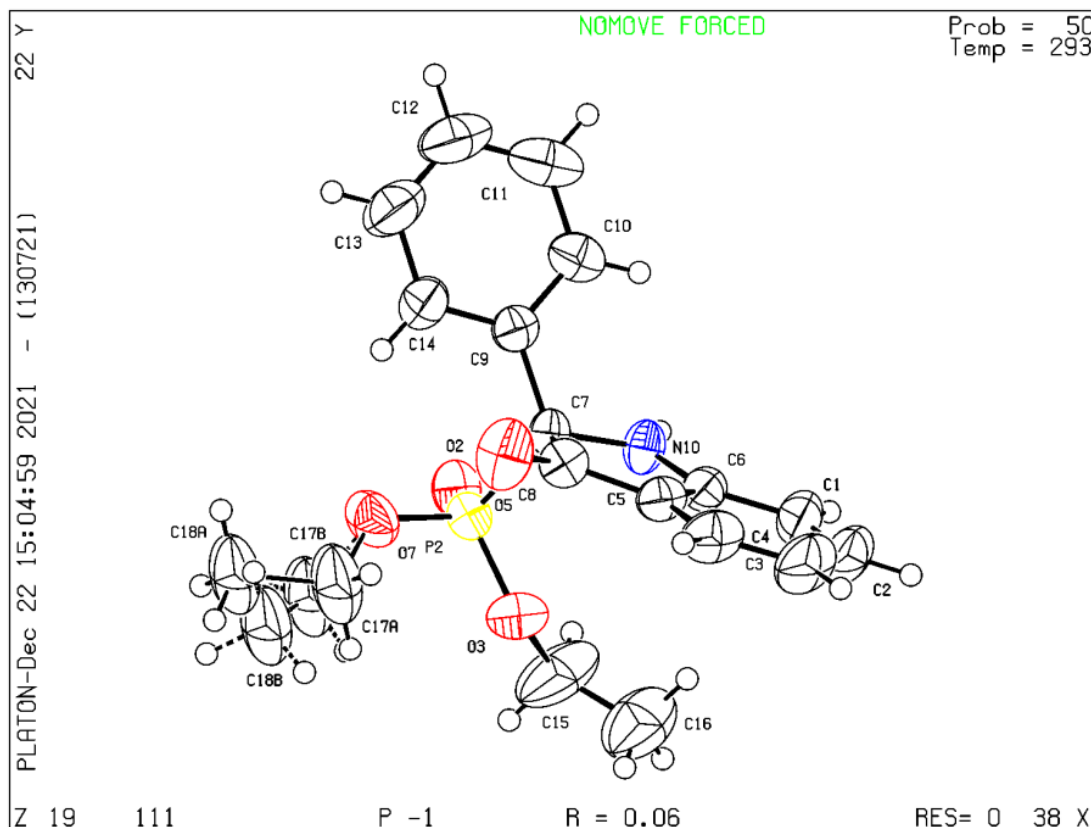

|                 |                                      |                    |
|-----------------|--------------------------------------|--------------------|
| Bond precision: | C-C = 0.0045 Å                       | Wavelength=0.71073 |
| Cell:           | a=9.8688(7) b=9.9088(7) c=10.7278(8) |                    |
|                 | alpha=73.336 (2) beta=75.766 (2)     |                    |
|                 | gamma=60.403 (2)                     |                    |
| Temperature:    | 293 K                                |                    |
|                 | Calculated                           | Reported           |
| Volume          | 866.99 (11)                          | 866.99 (11)        |
| Space group     | P -1                                 | P -1               |
| Hall group      | -P 1                                 | -P 1               |
| Moiety formula  | C18 H20 N O4 P                       | C18 H20 N O4 P     |
| Sum formula     | C18 H20 N O2 P                       | C18 H20 N O4 P     |
| Mr              | 345.32                               | 345.32             |
| Dx,g cm-3       | 1.323                                | 1.323              |
| Z               | 2                                    | 2                  |
| Mu (mm-1)       | 0.180                                | 0.180              |
| F000            | 364.0                                | 364.0              |
| F000'           | 364.37                               |                    |
| h,k,lmax        | 12,12,13                             | 12,12,13           |



|                                                               |             |                                 |
|---------------------------------------------------------------|-------------|---------------------------------|
| Nref                                                          | 3991        | 3970                            |
| Tmin,Tmax                                                     | 0.945,0.972 | 0.689,0.746                     |
| Tmin'                                                         | 0.937       |                                 |
| Correction method= # Reported T Limits: Tmin=0.689 Tmax=0.746 |             |                                 |
| AbsCorr = MULTI-SCAN                                          |             |                                 |
| Data completeness= 0.995                                      |             | Theta(max)= 27.551              |
| R(reflections)= 0.0589( 3309)                                 |             | wR2(reflections)= 0.1673( 3970) |
| S = 1.026                                                     |             | Npar= 221                       |

## 6. $^1\text{H}$ NMR, $^{13}\text{C}$ NMR, $^{31}\text{P}$ NMR and $^{19}\text{F}$ NMR spectra for compounds

### 2-(diphenylphosphoryl)-2-phenylindolin-3-one (3a)

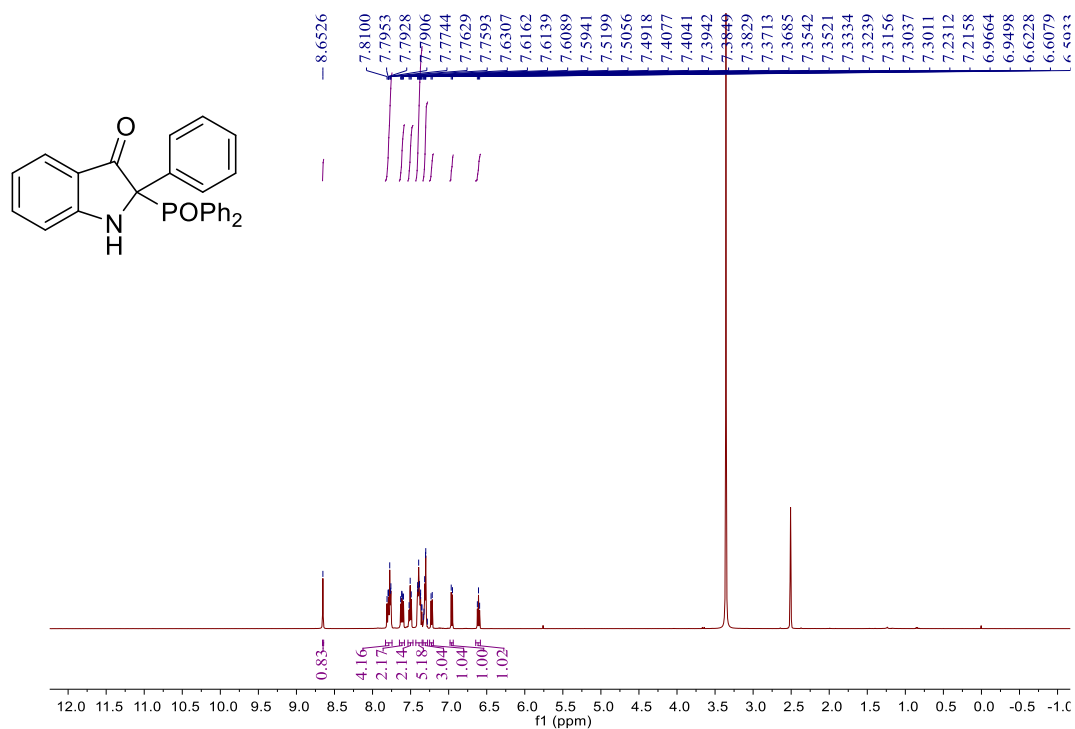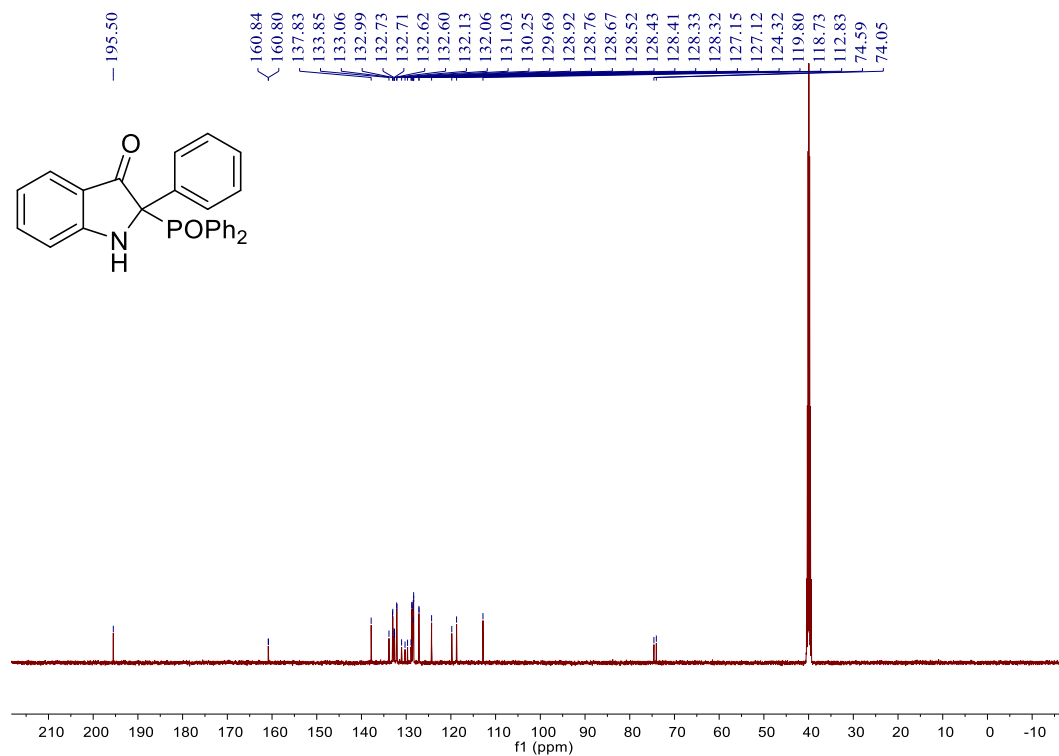

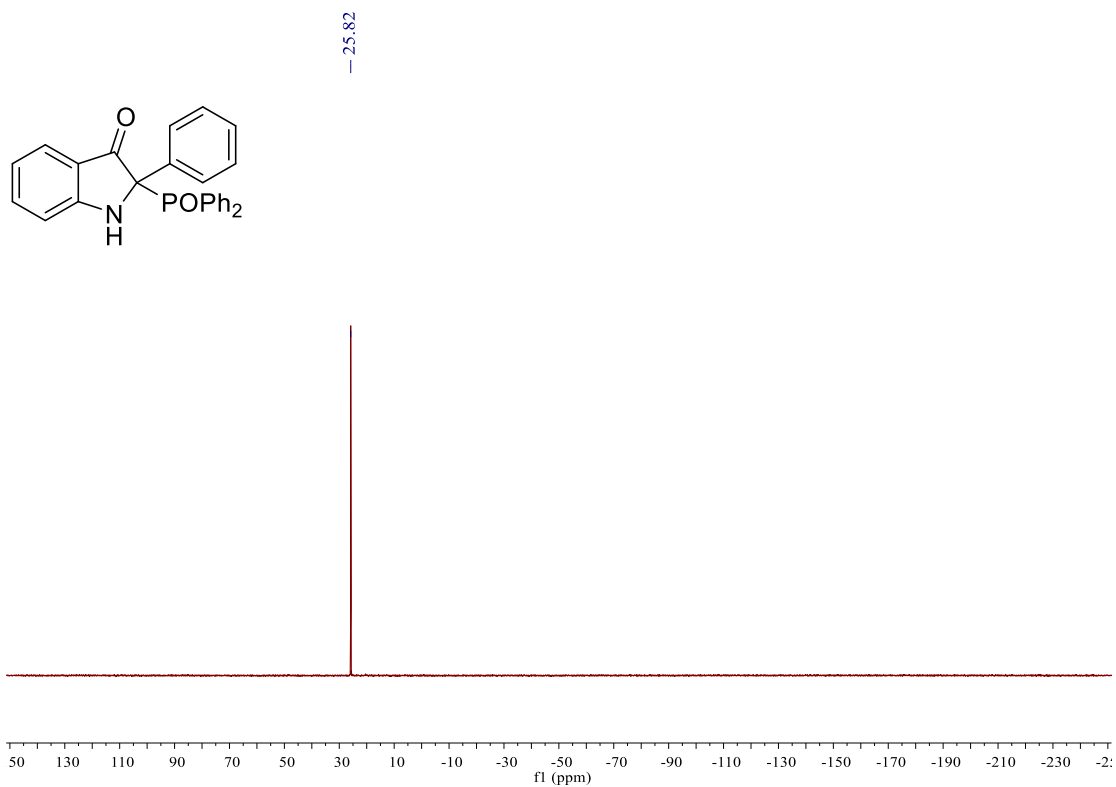

**2-(diphenylphosphoryl)-6-methyl-2-phenylindolin-3-one (3b)**

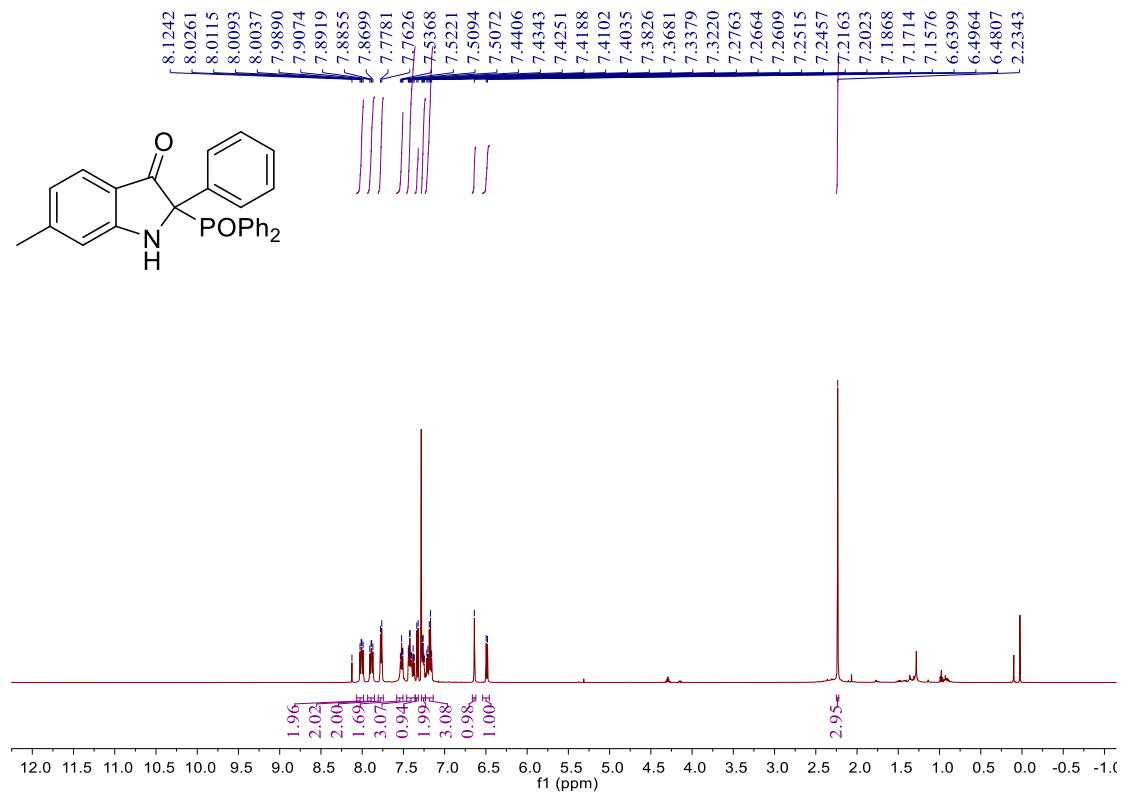

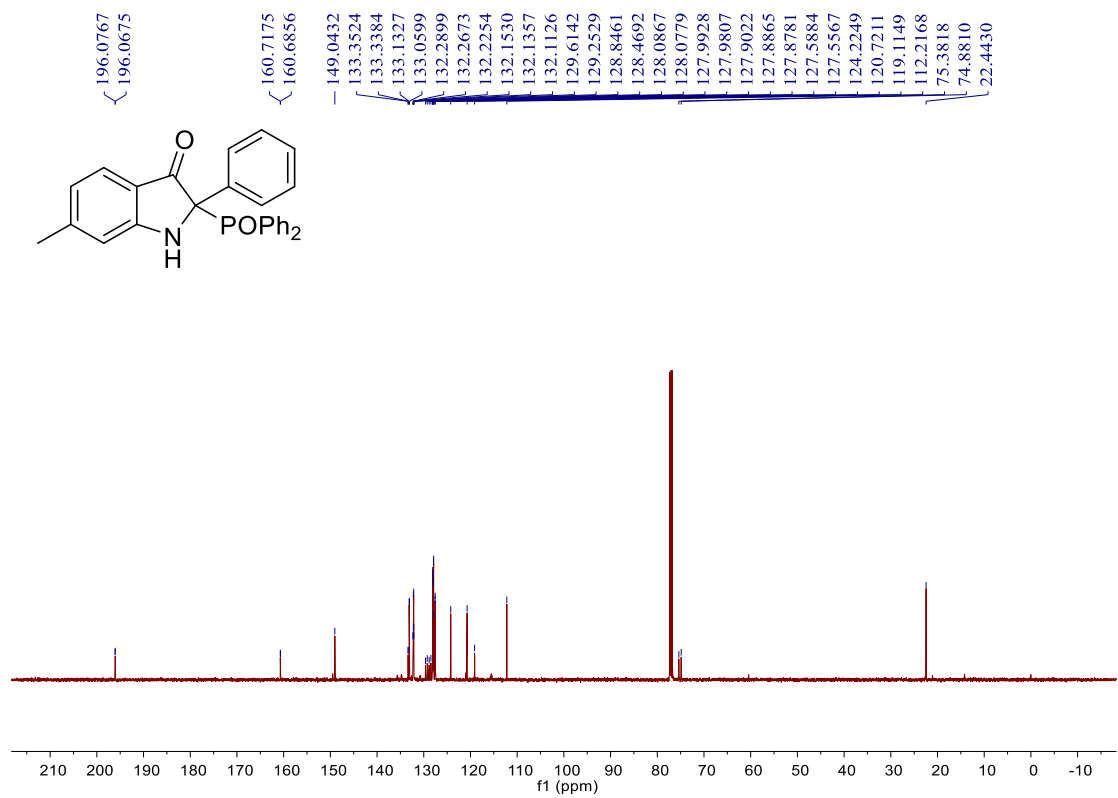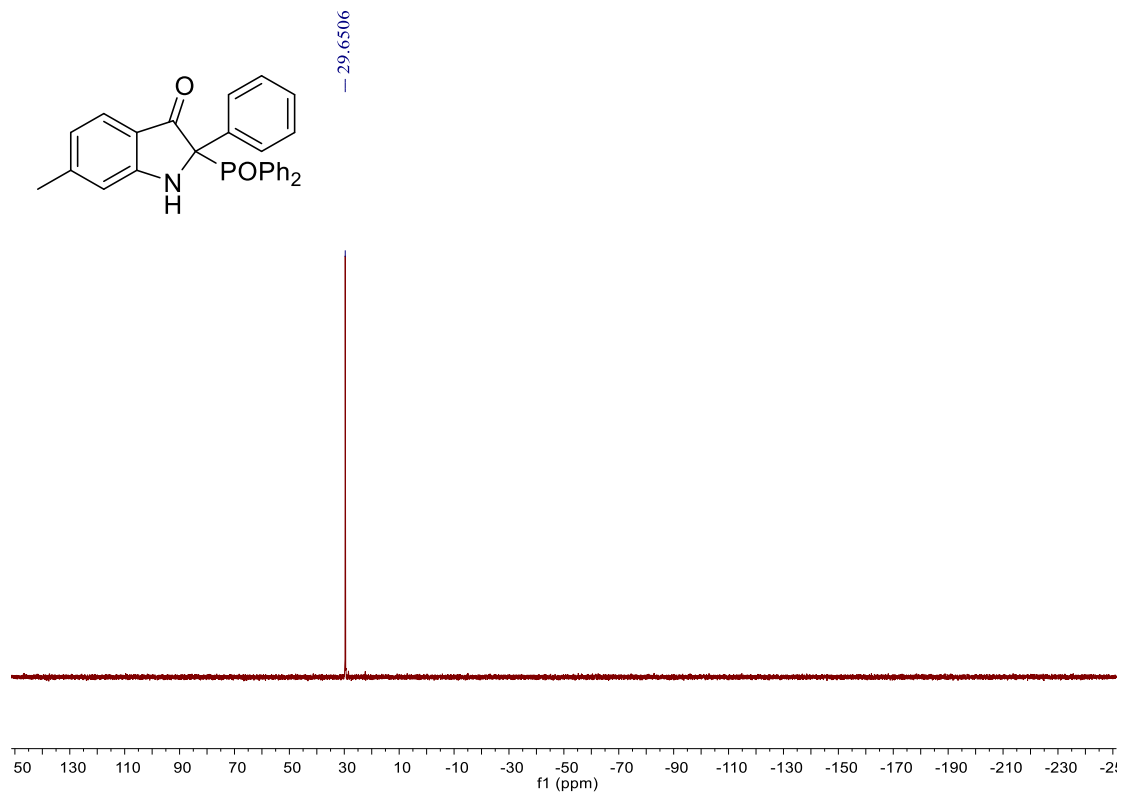

**2-(diphenylphosphoryl)-5-methyl-2-phenylindolin-3-one (3c)**

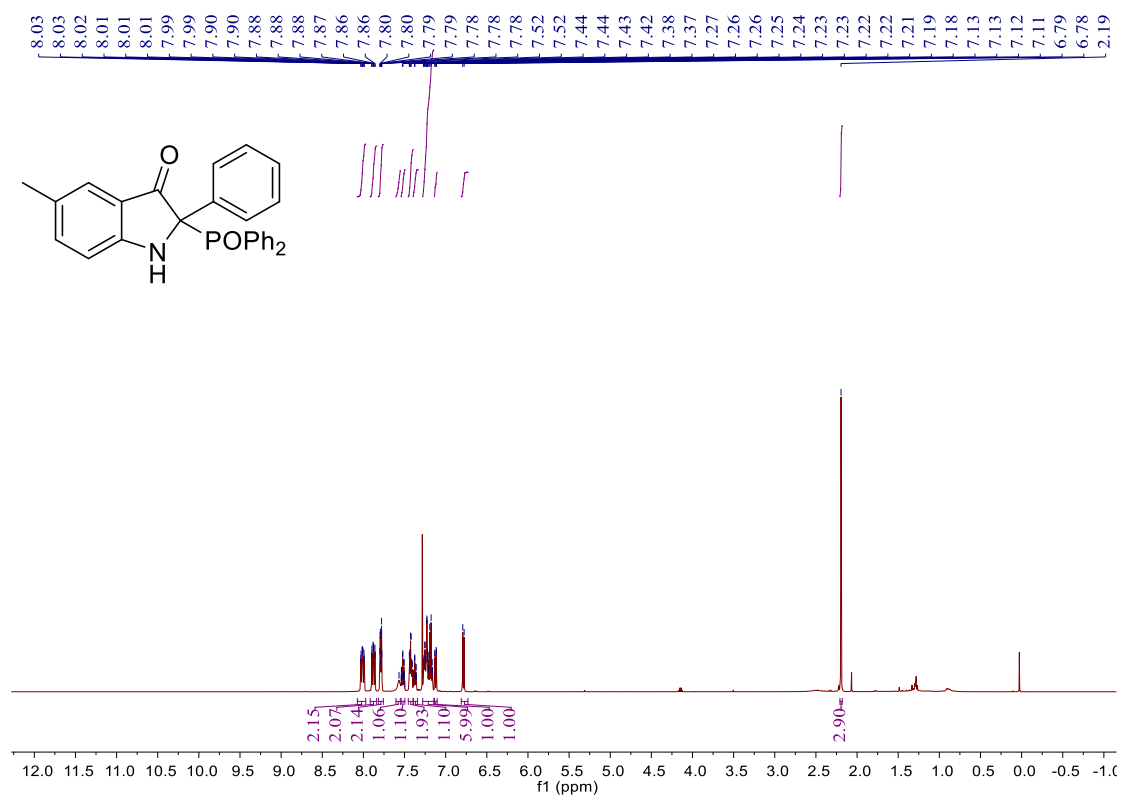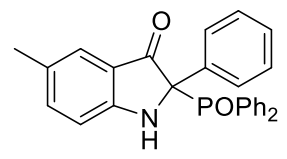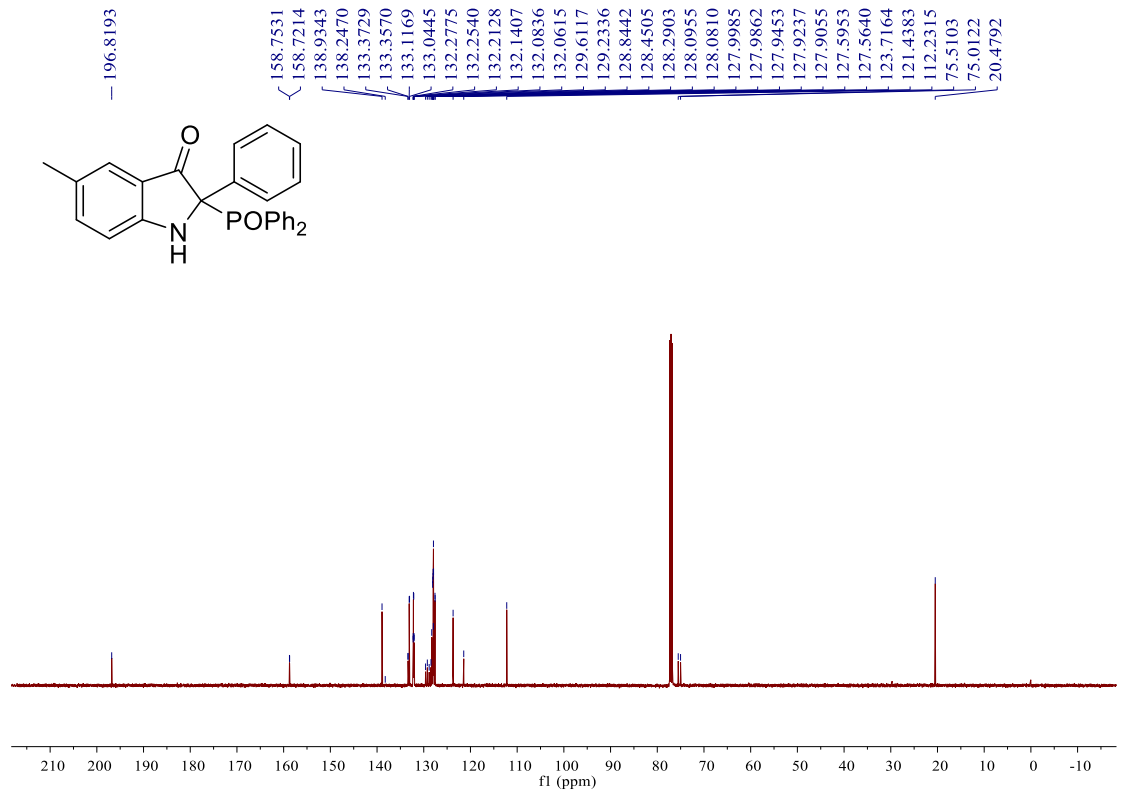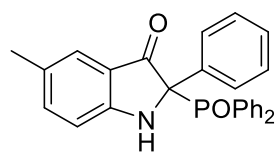

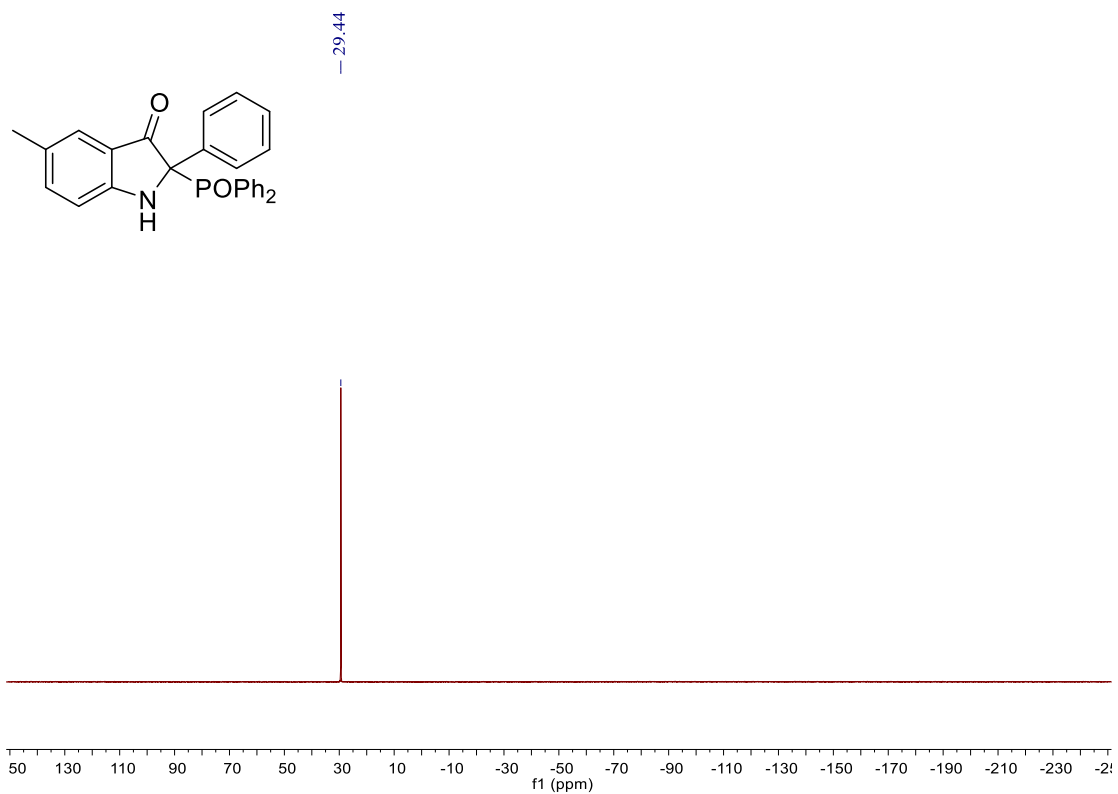

**2-(diphenylphosphoryl)-7-methyl-2-phenylindolin-3-one (3d)**

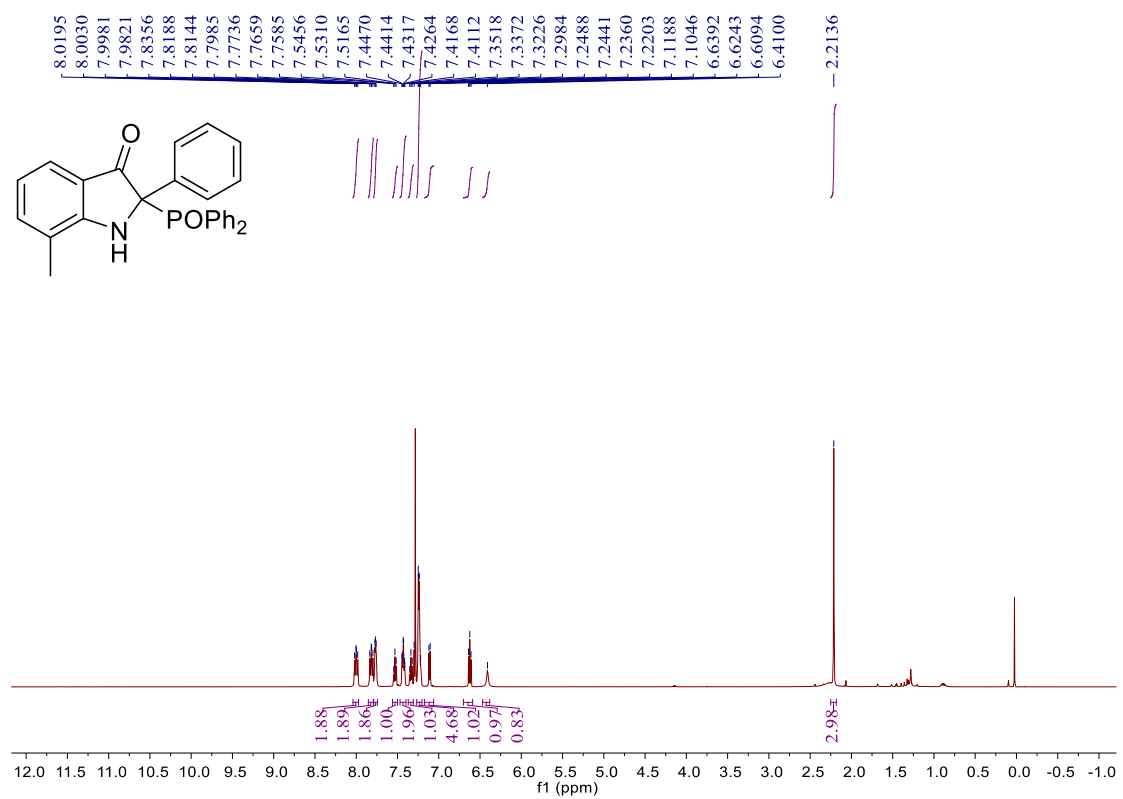

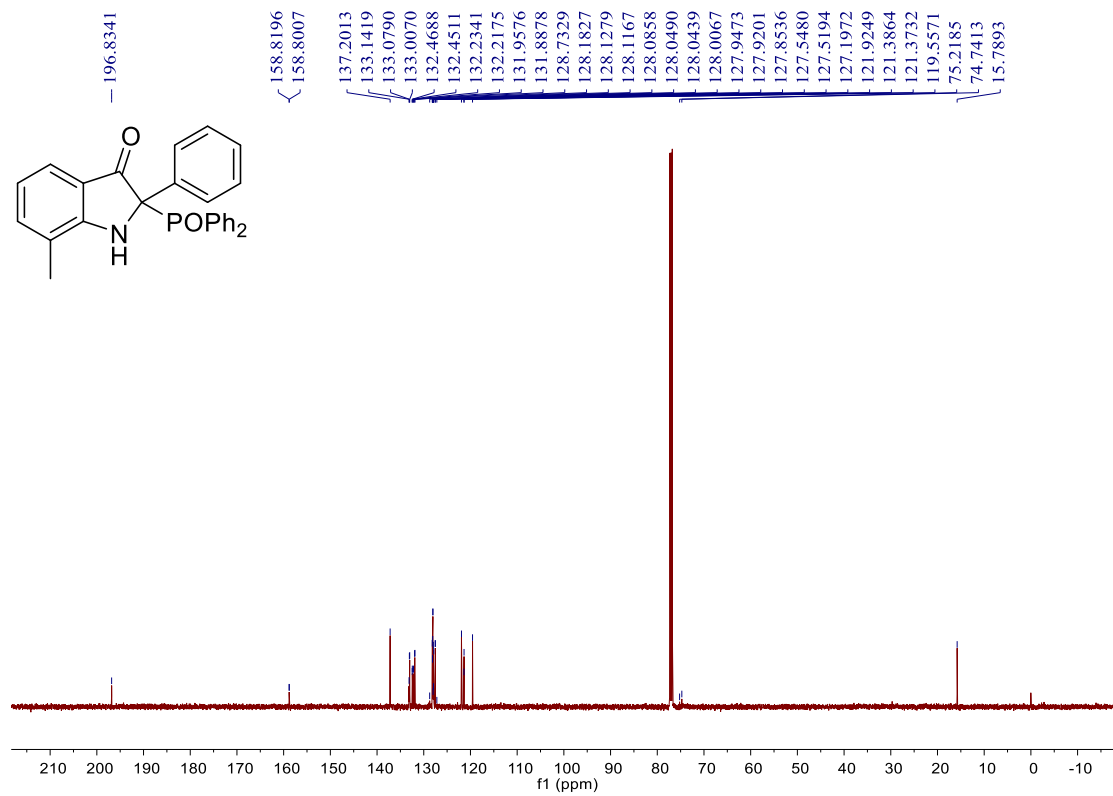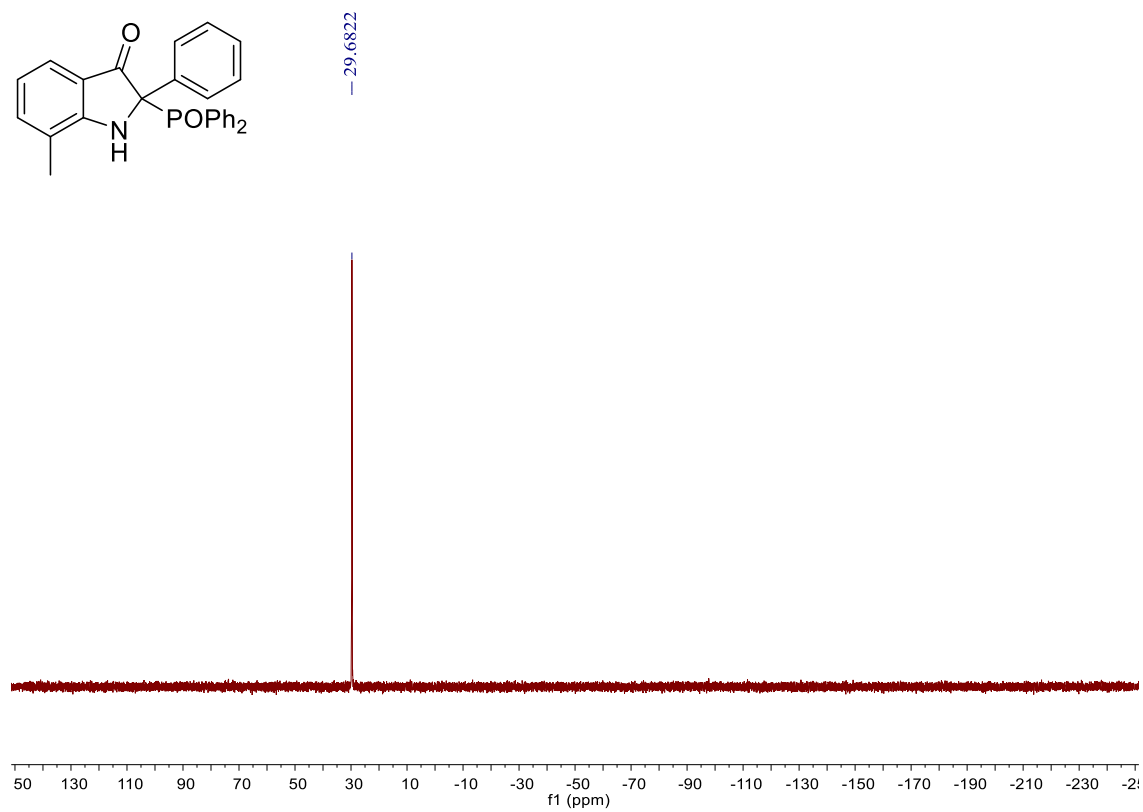

**5-bromo-2-(diphenylphosphoryl)-2-phenylindolin-3-one (3e)**

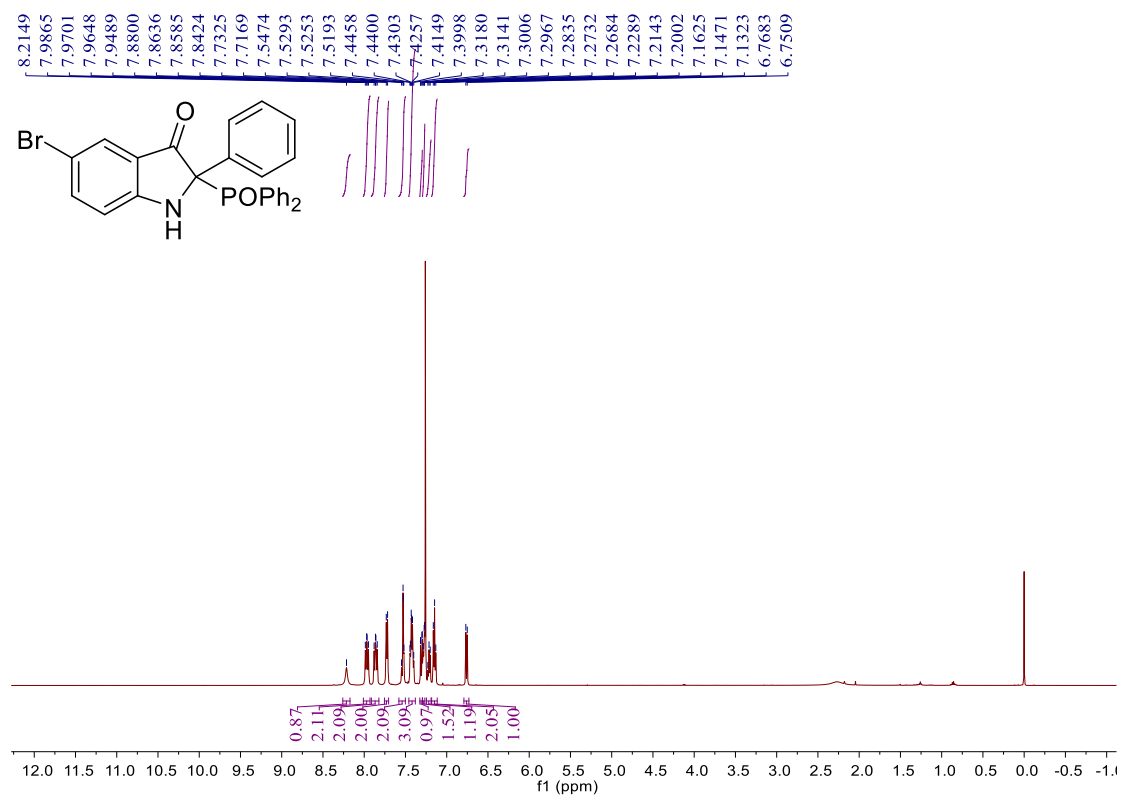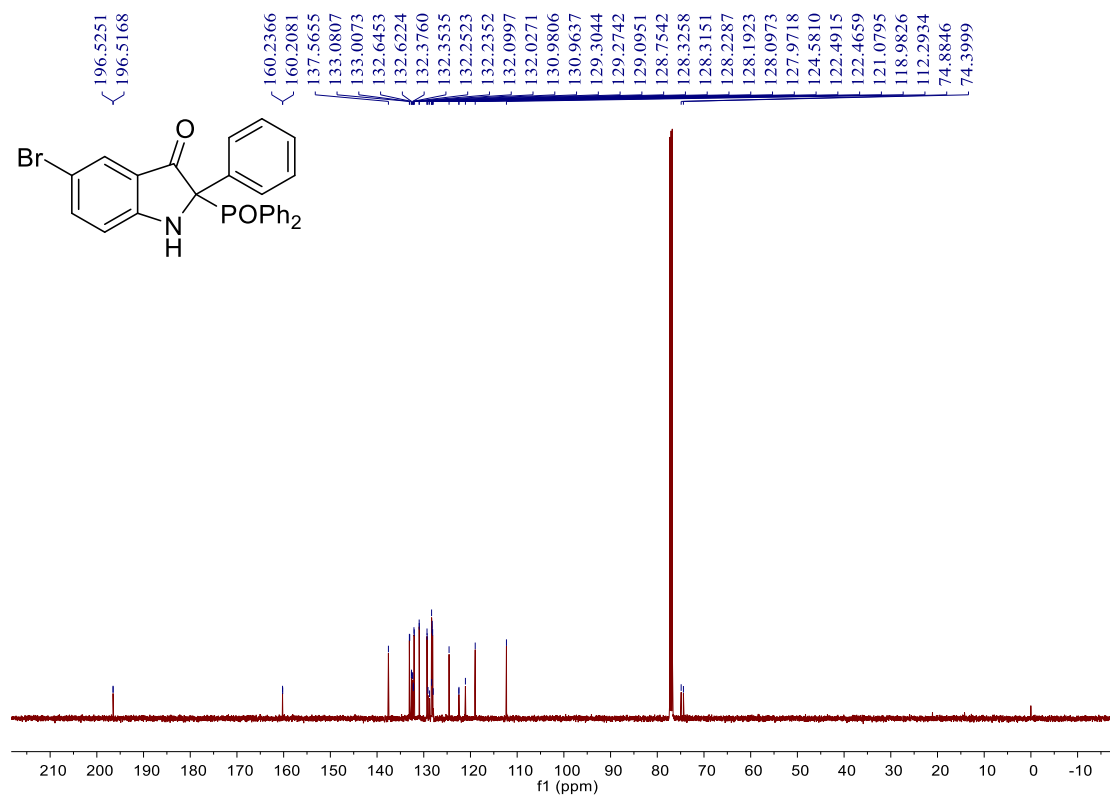



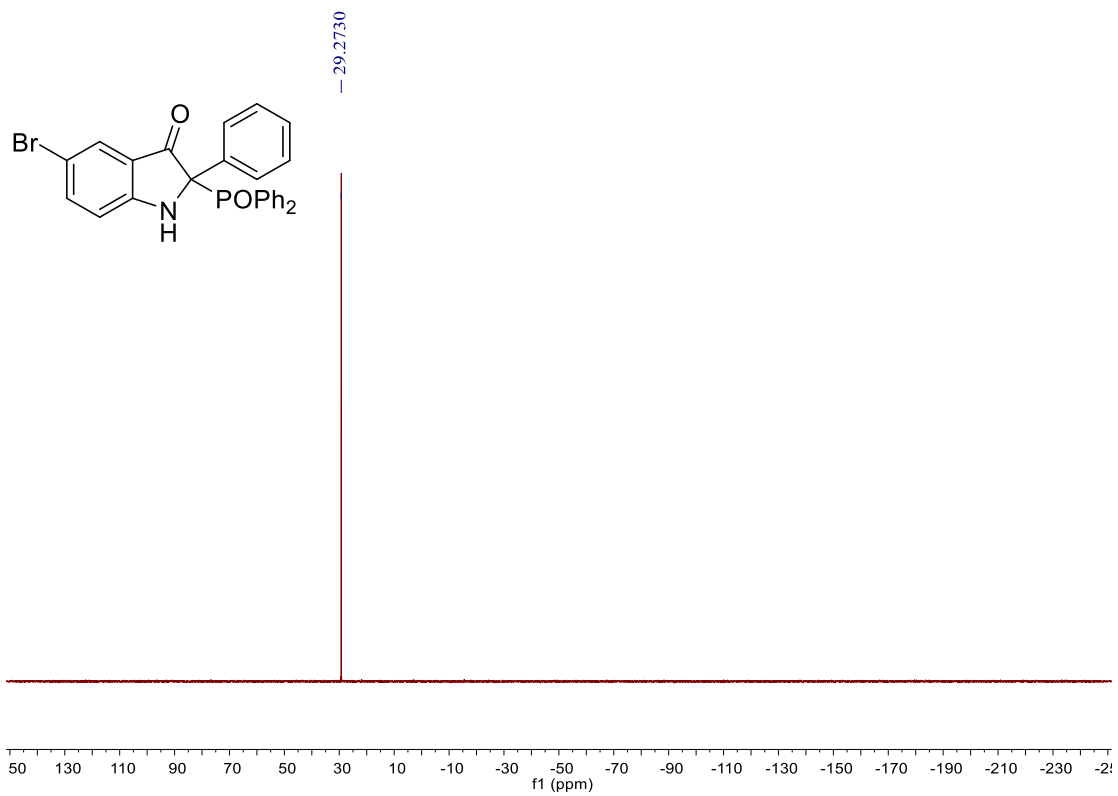

**6-chloro-2-(diphenylphosphoryl)-2-phenylindolin-3-one (3f)**

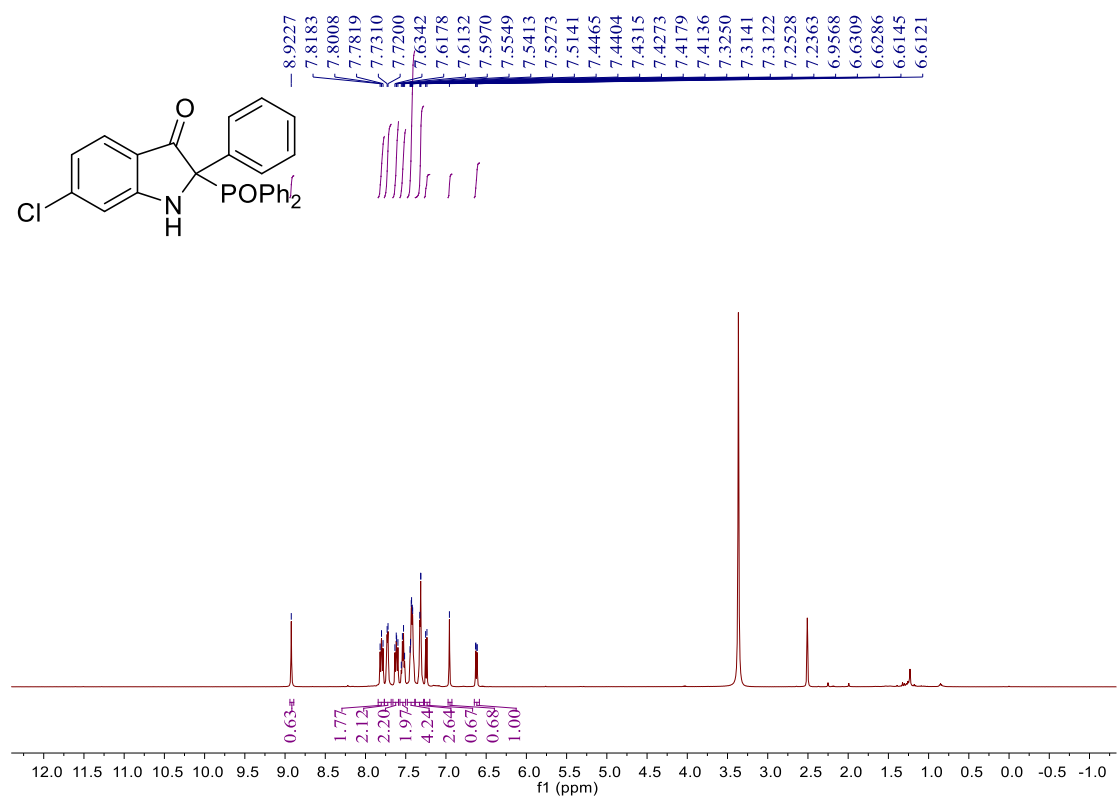

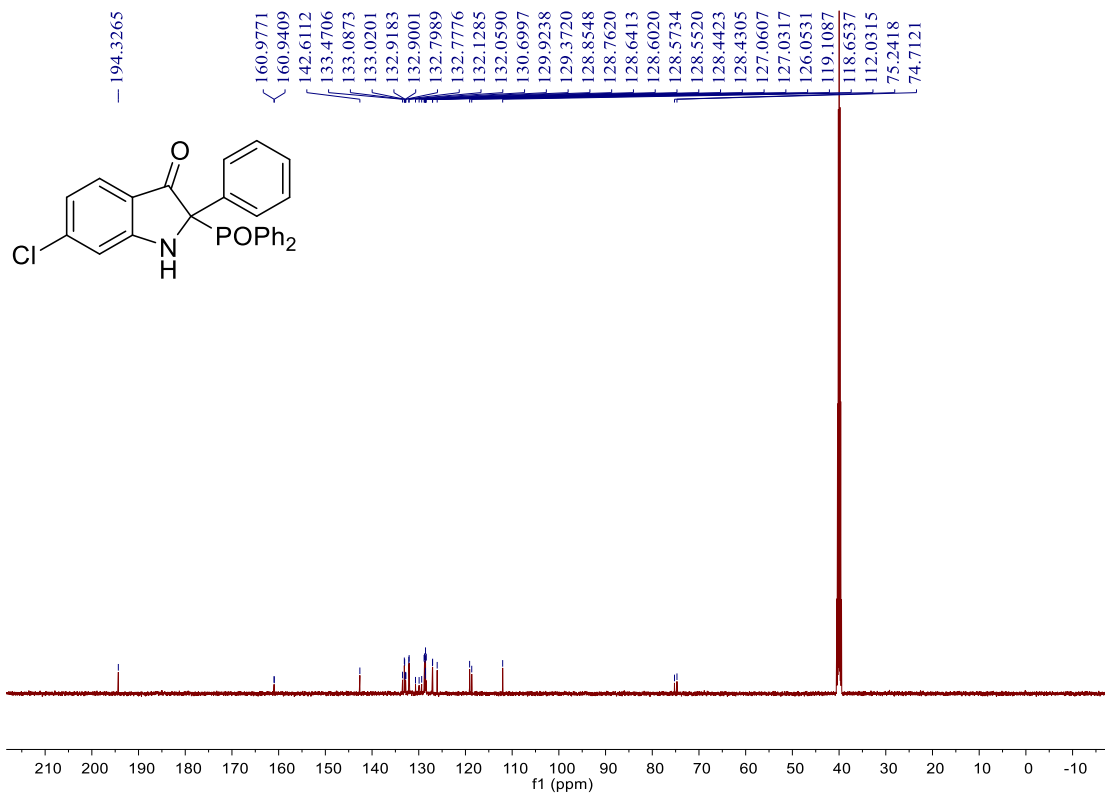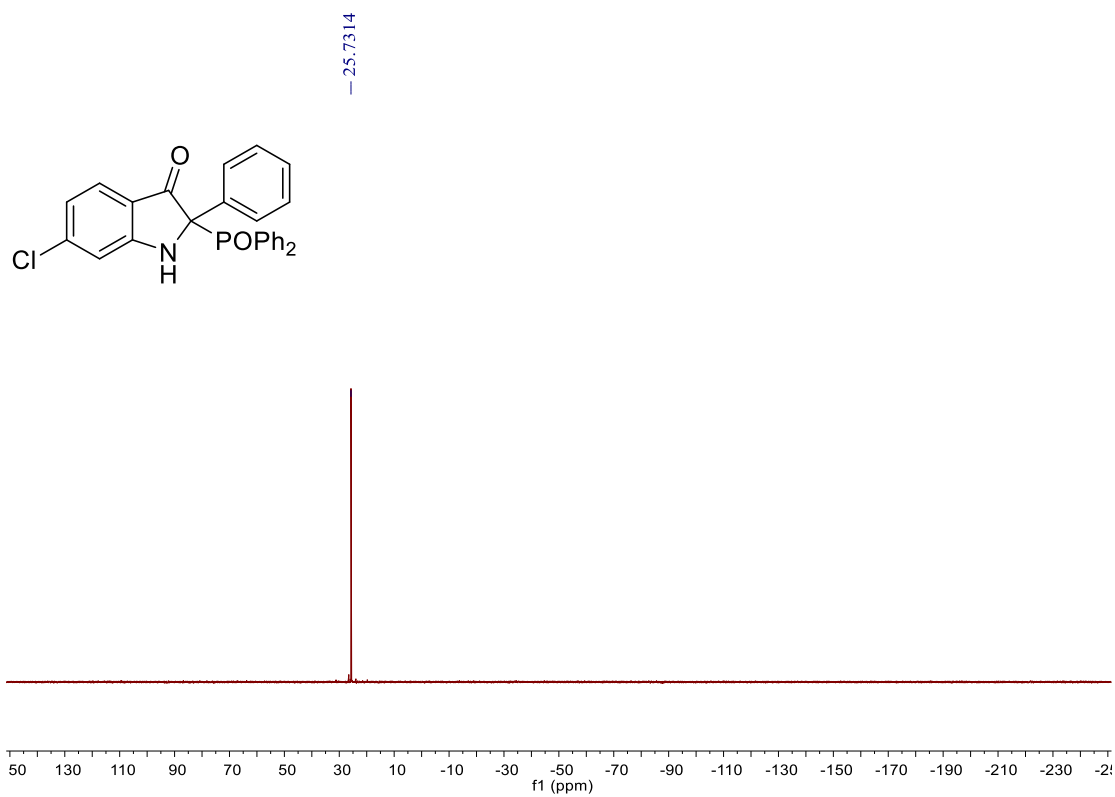

**2-(diphenylphosphoryl)-3-oxo-2-phenylindoline-5-carbonitrile (3g)**

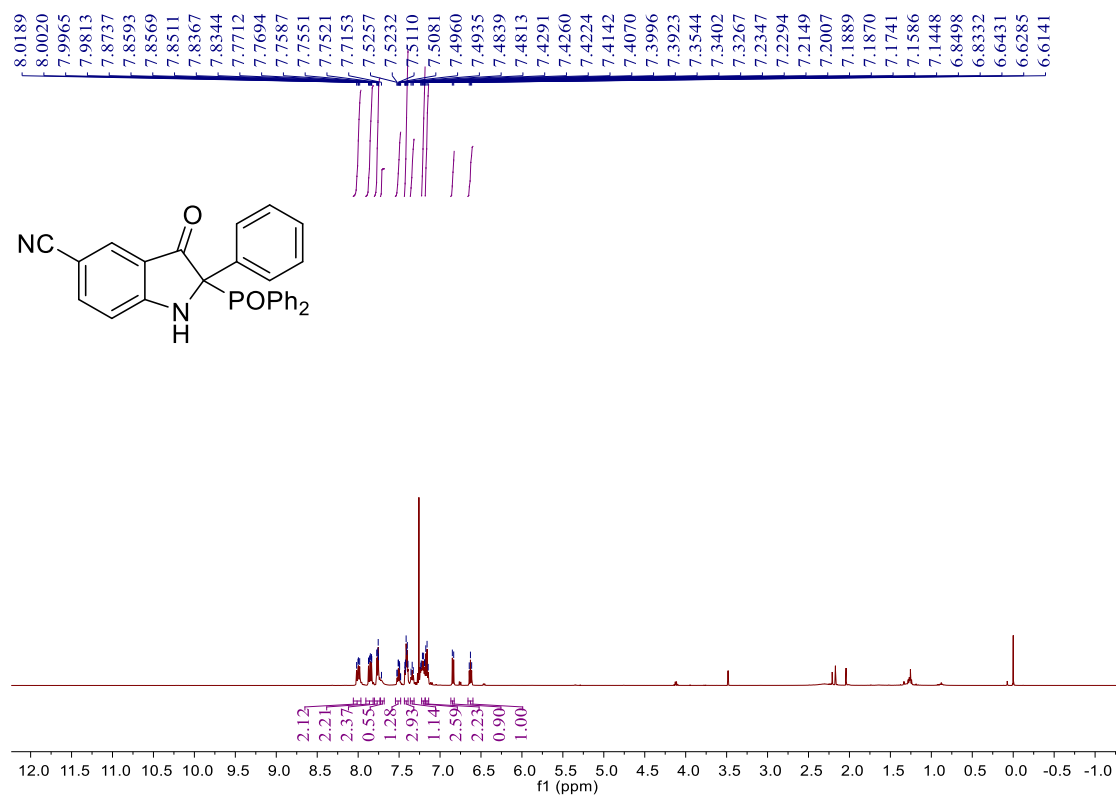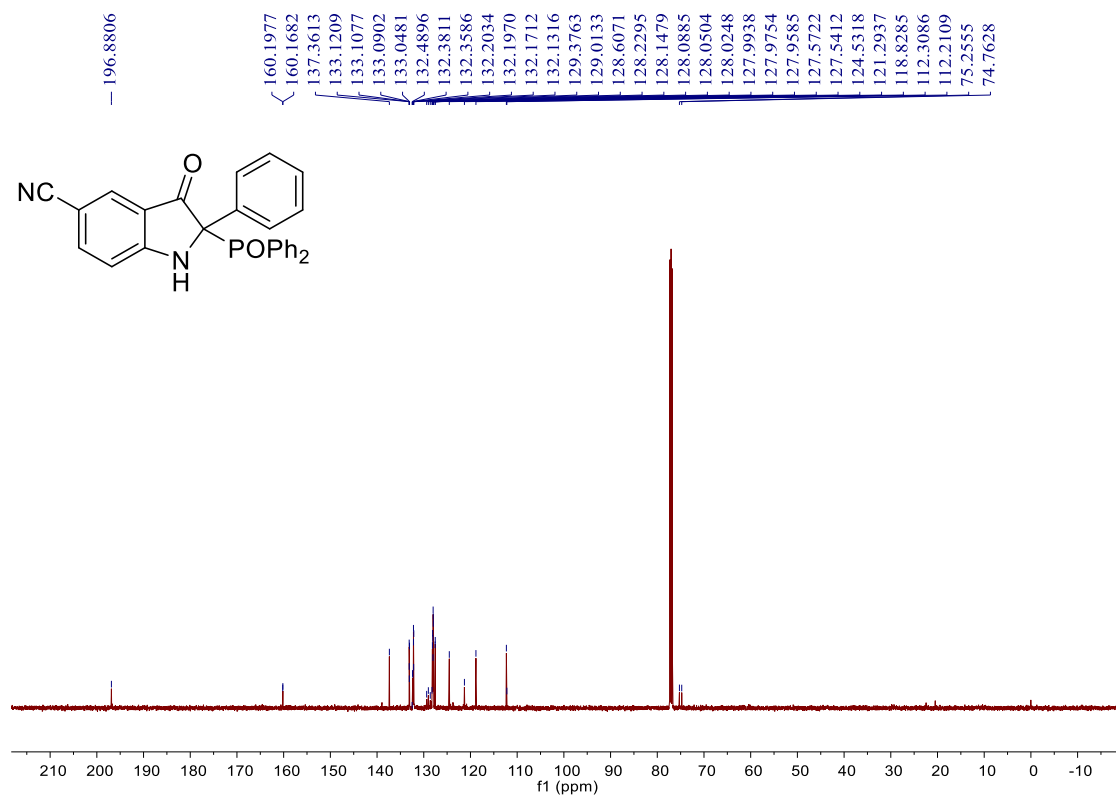

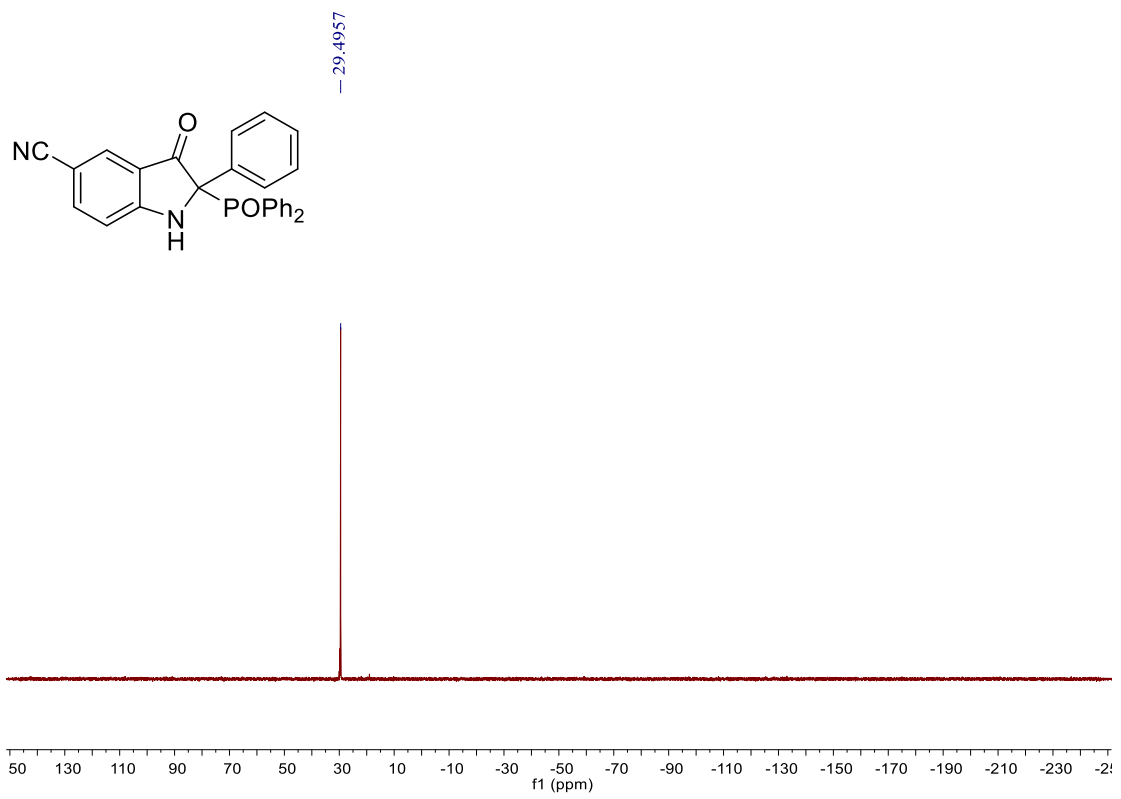

**2-(diphenylphosphoryl)-2-(4-methoxyphenyl)indolin-3-one (3h)**

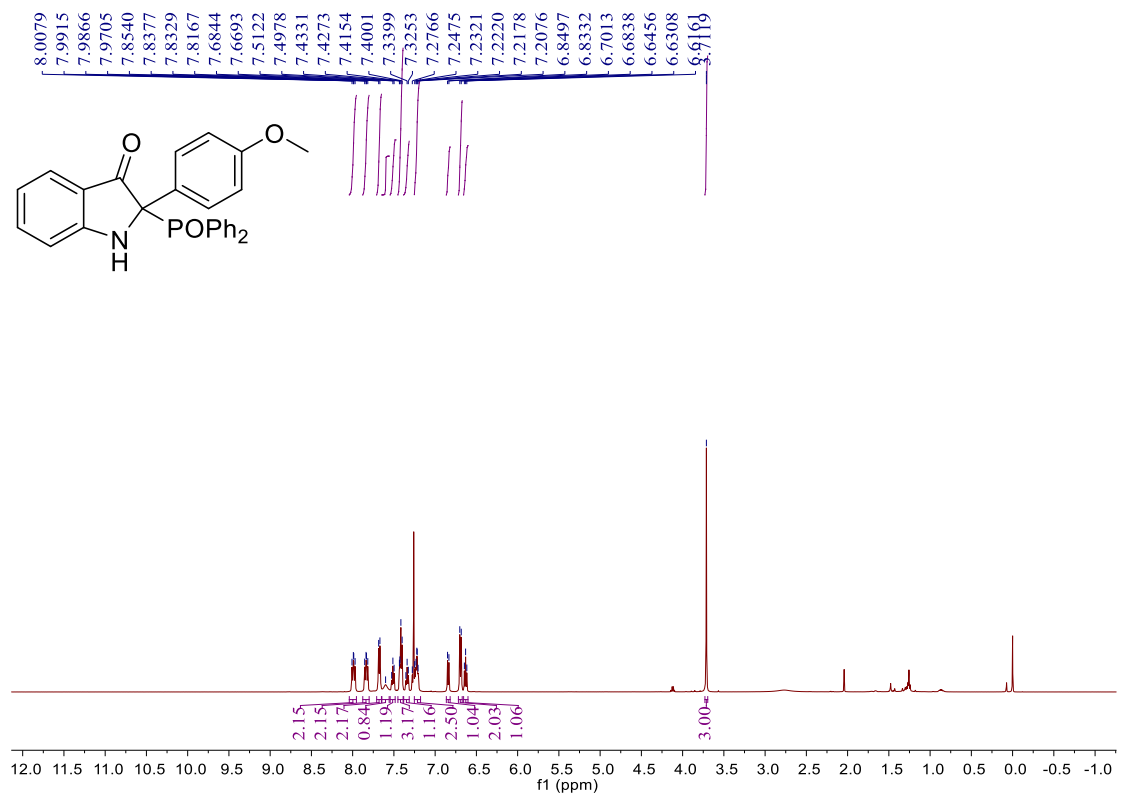

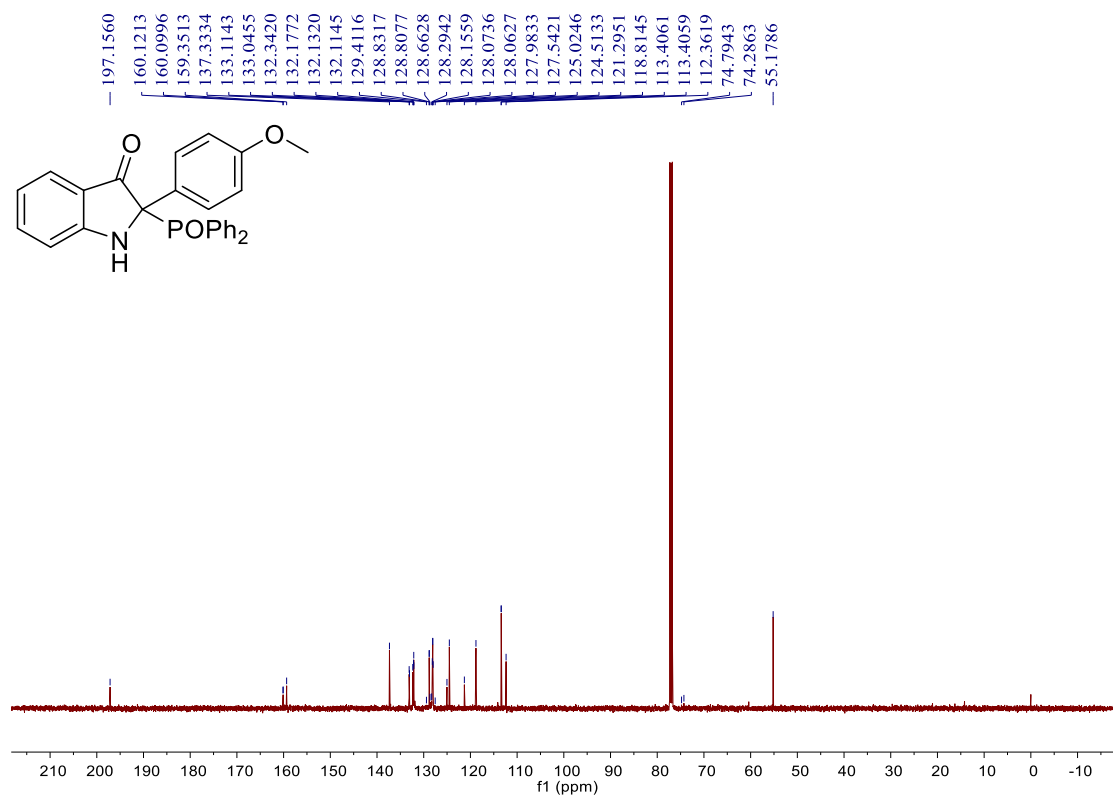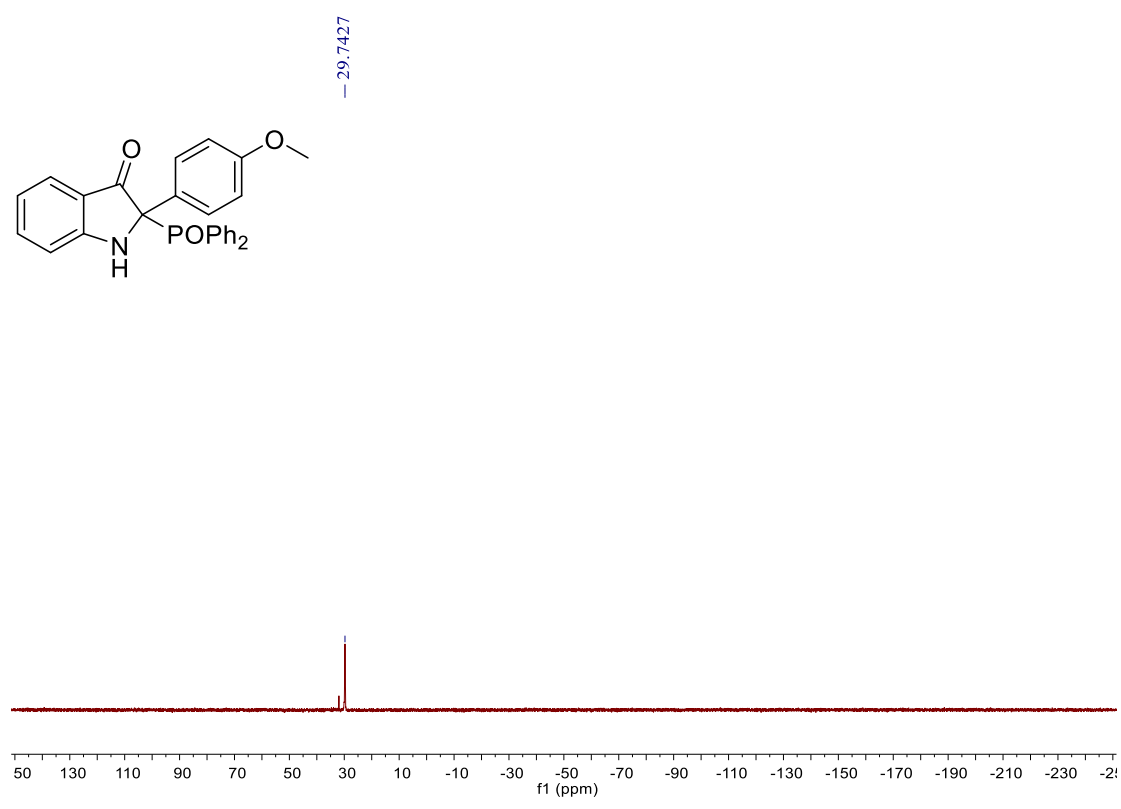

## 2-(diphenylphosphoryl)-2-(4-fluorophenyl)indolin-3-one (3i)

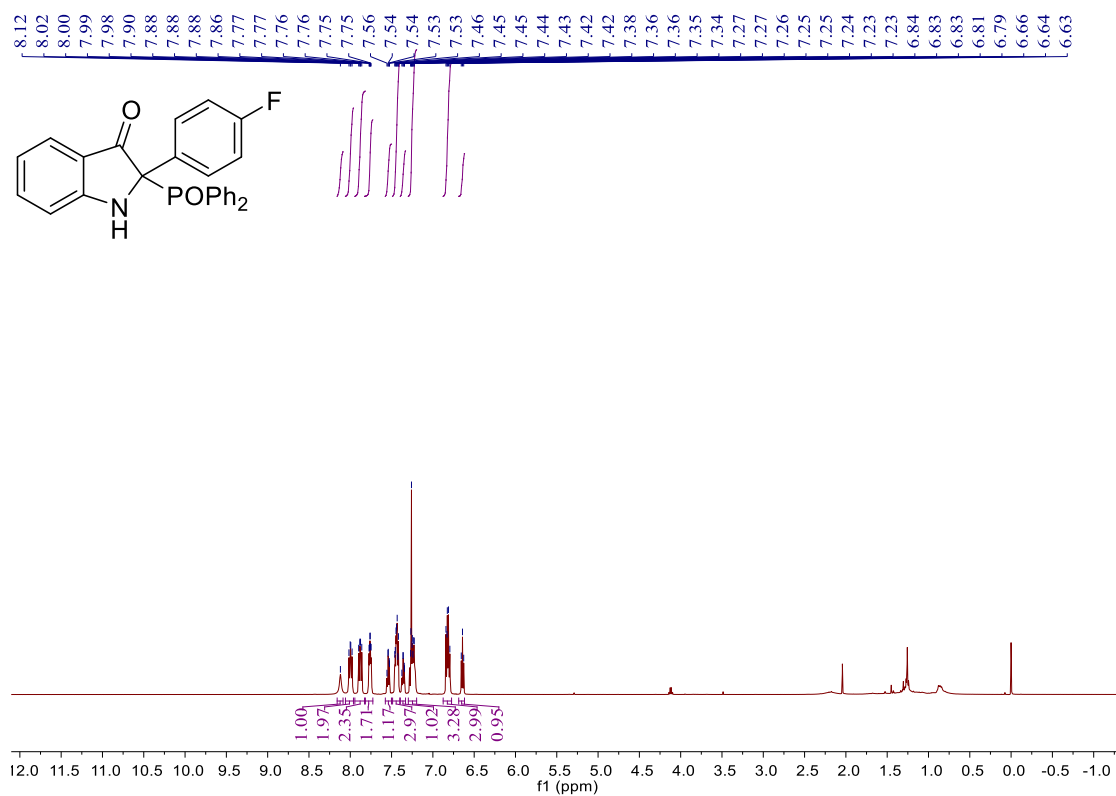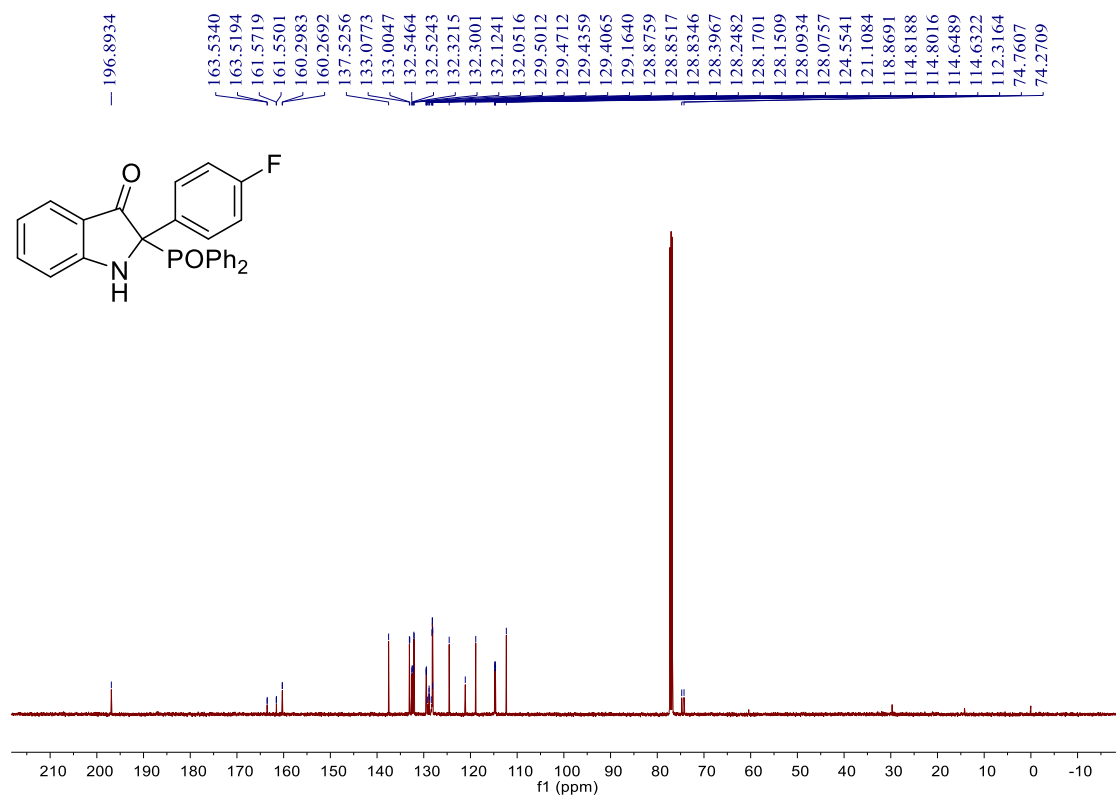

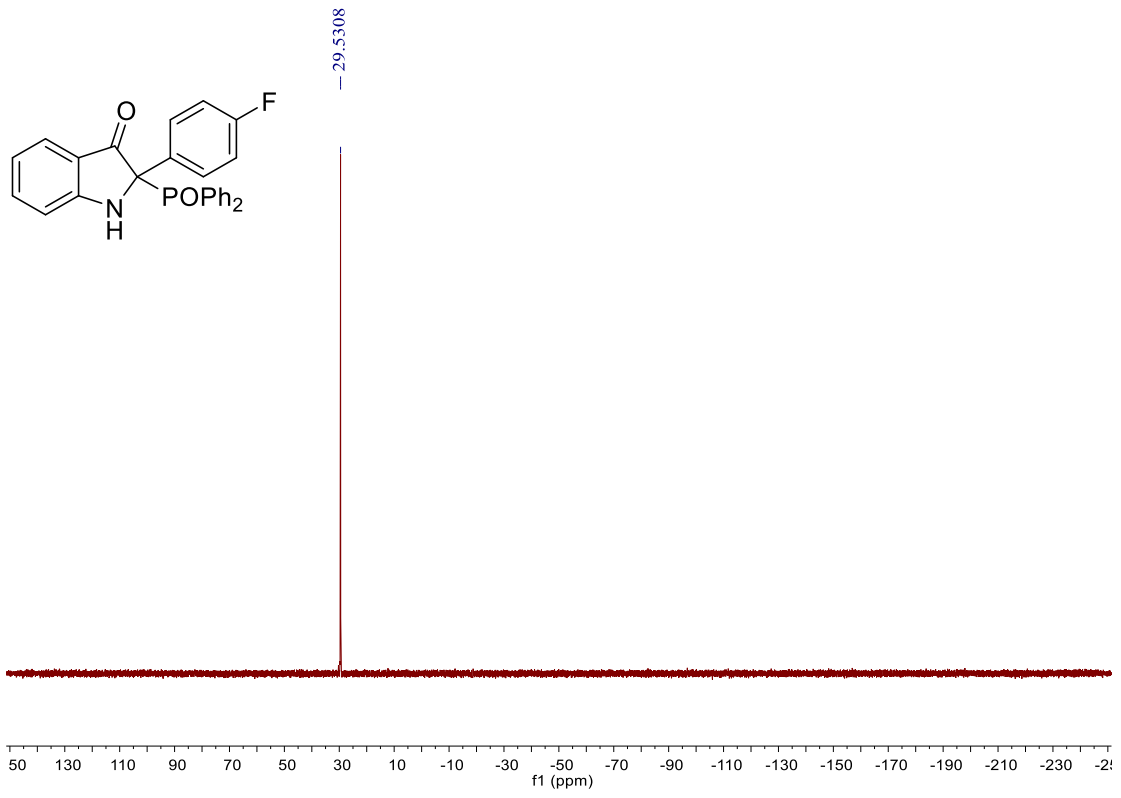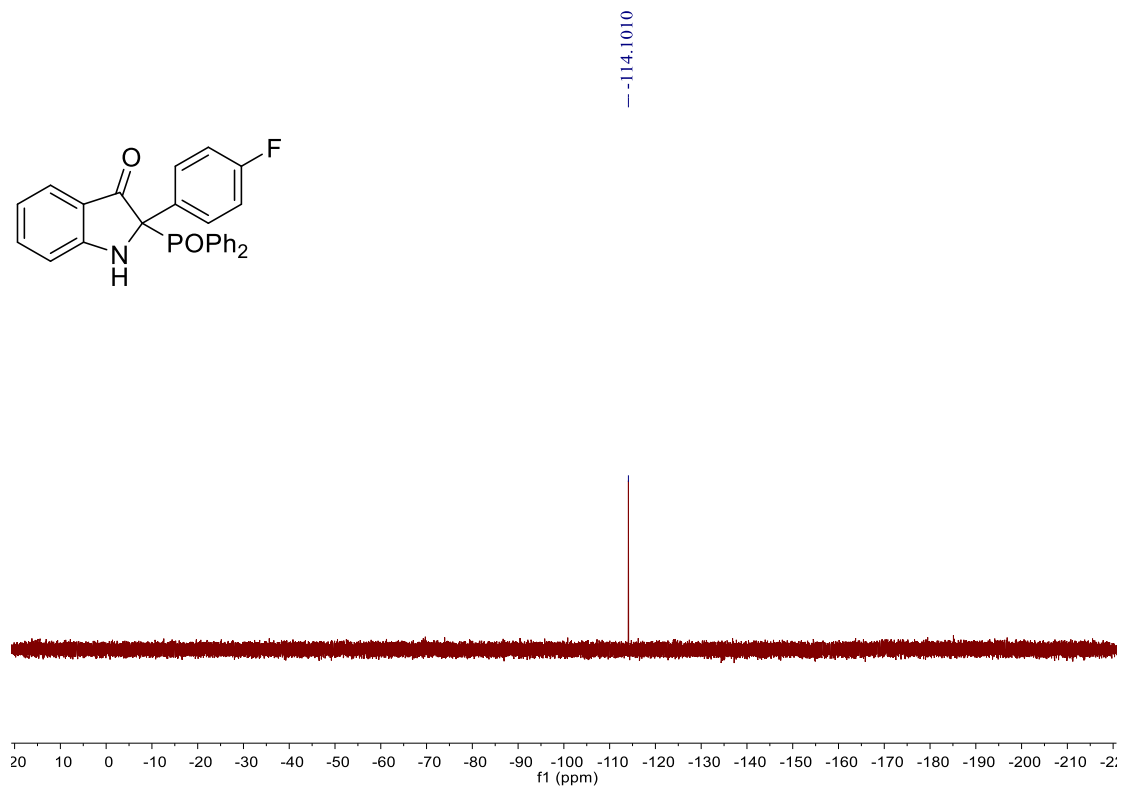

**2-(4-bromophenyl)-2-(diphenylphosphoryl)indolin-3-one (3j)**

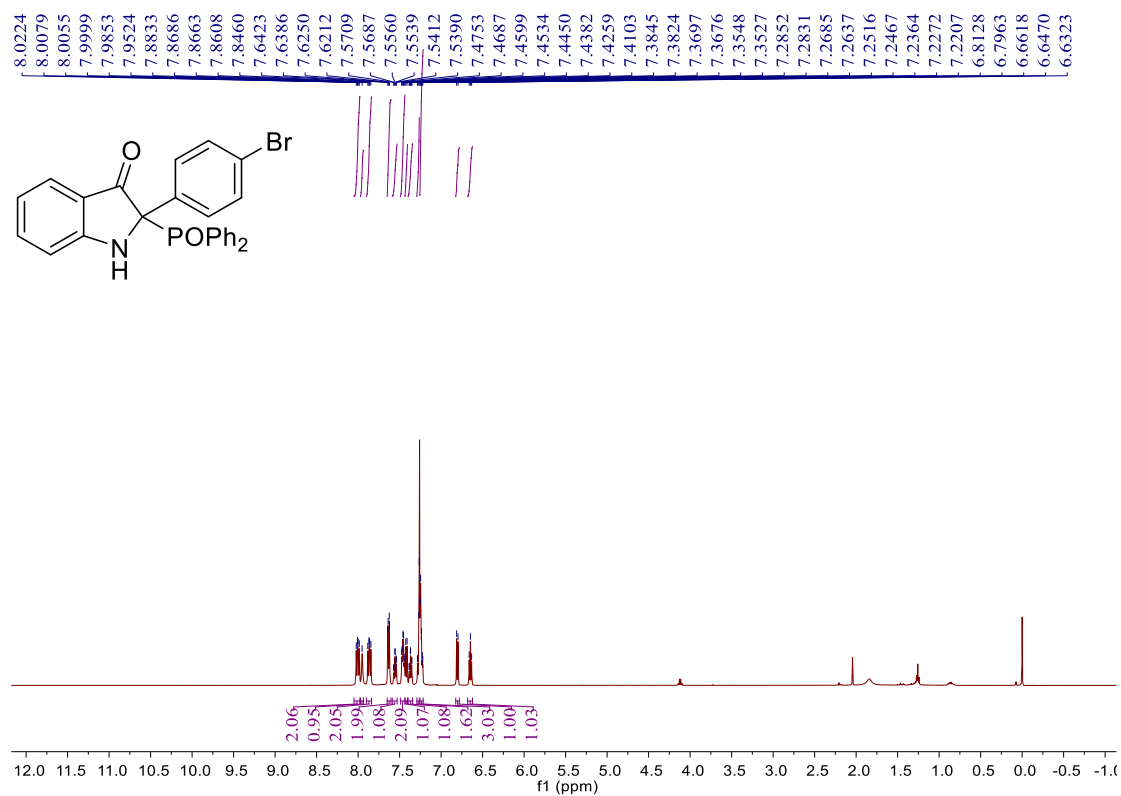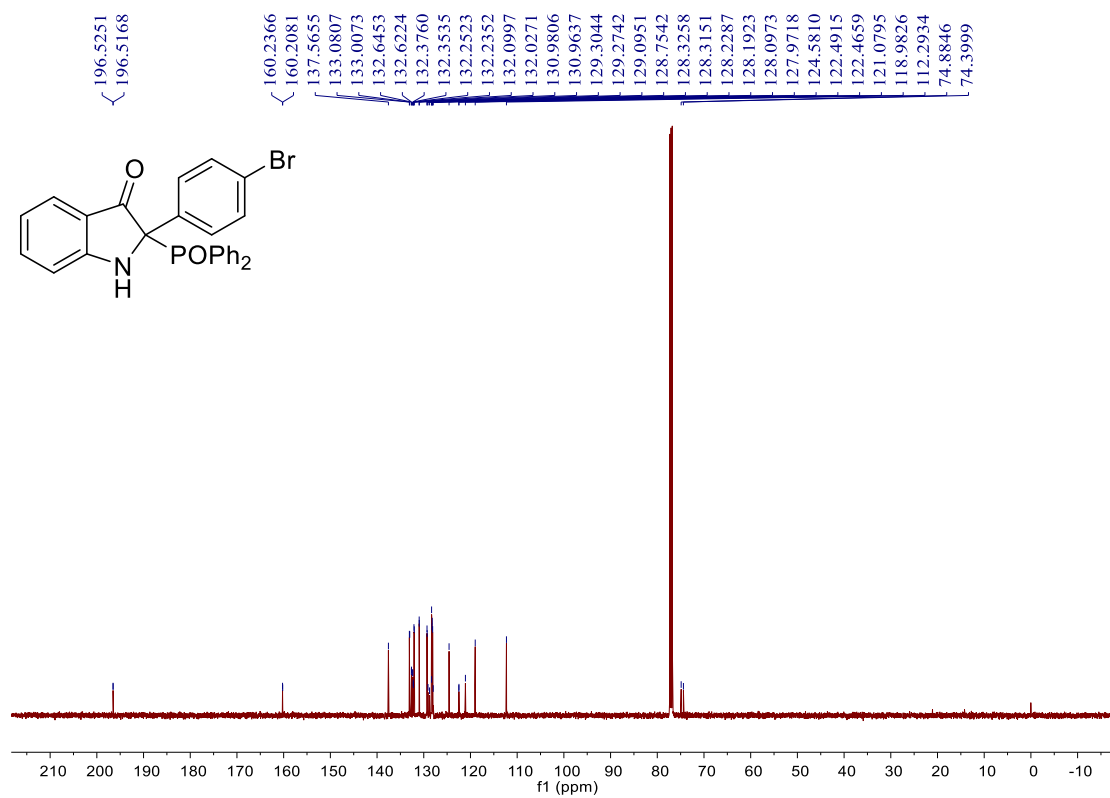



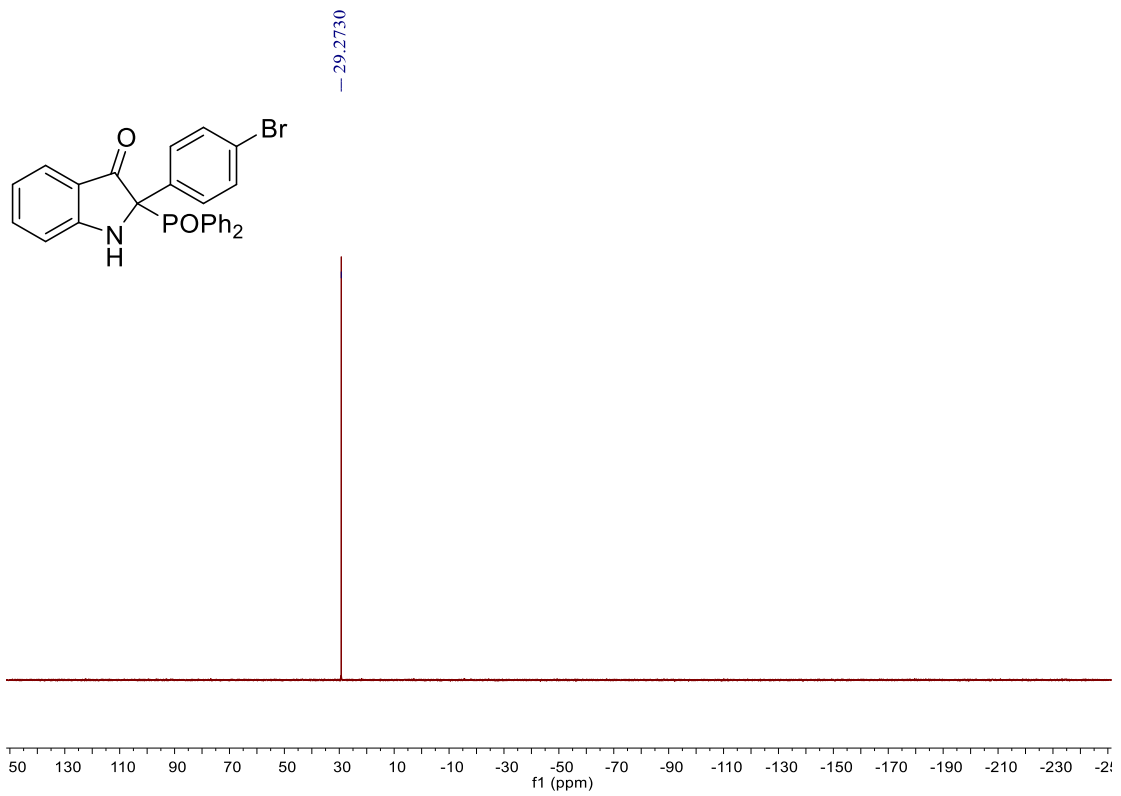

**2-(diphenylphosphoryl)-2-(naphthalen-2-yl)indolin-3-one (3k)**

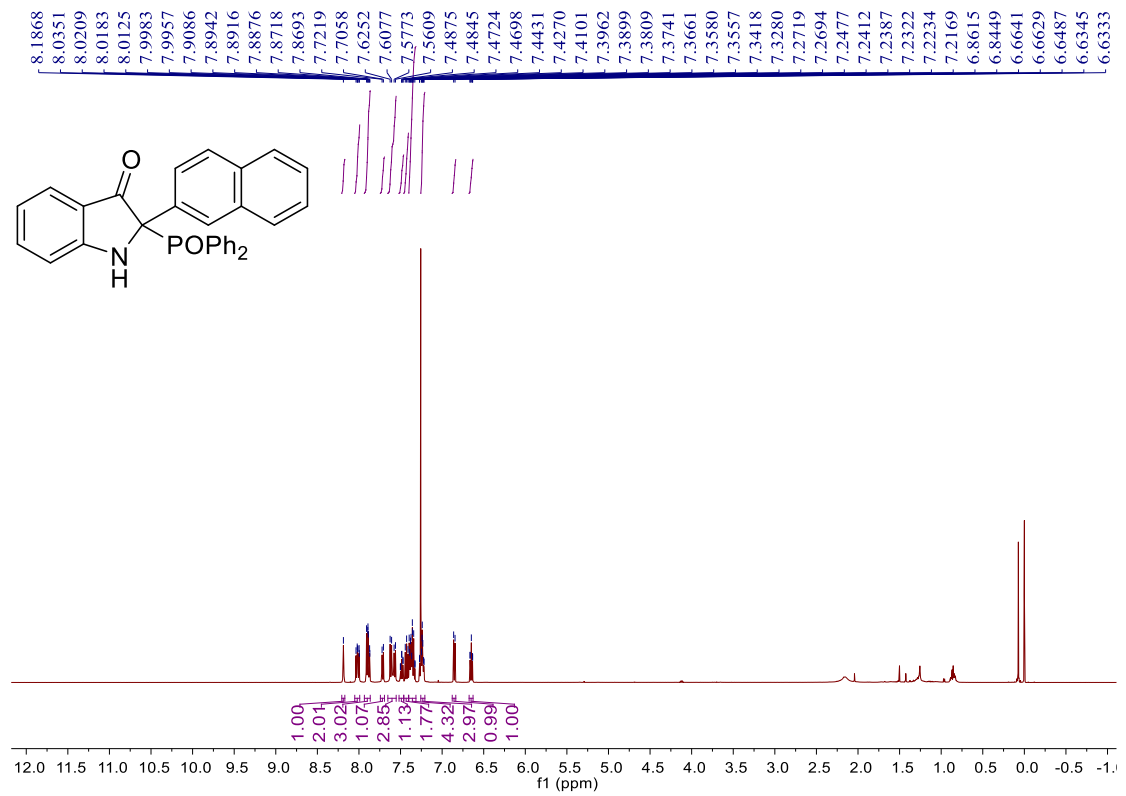

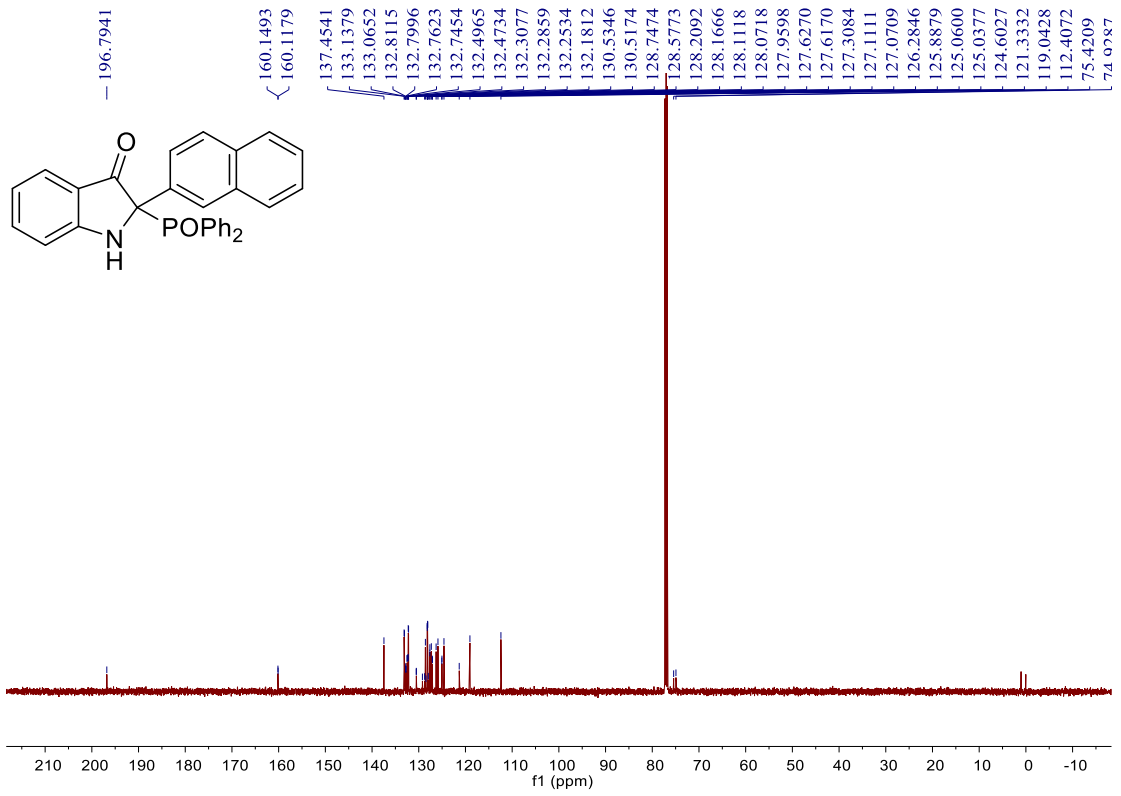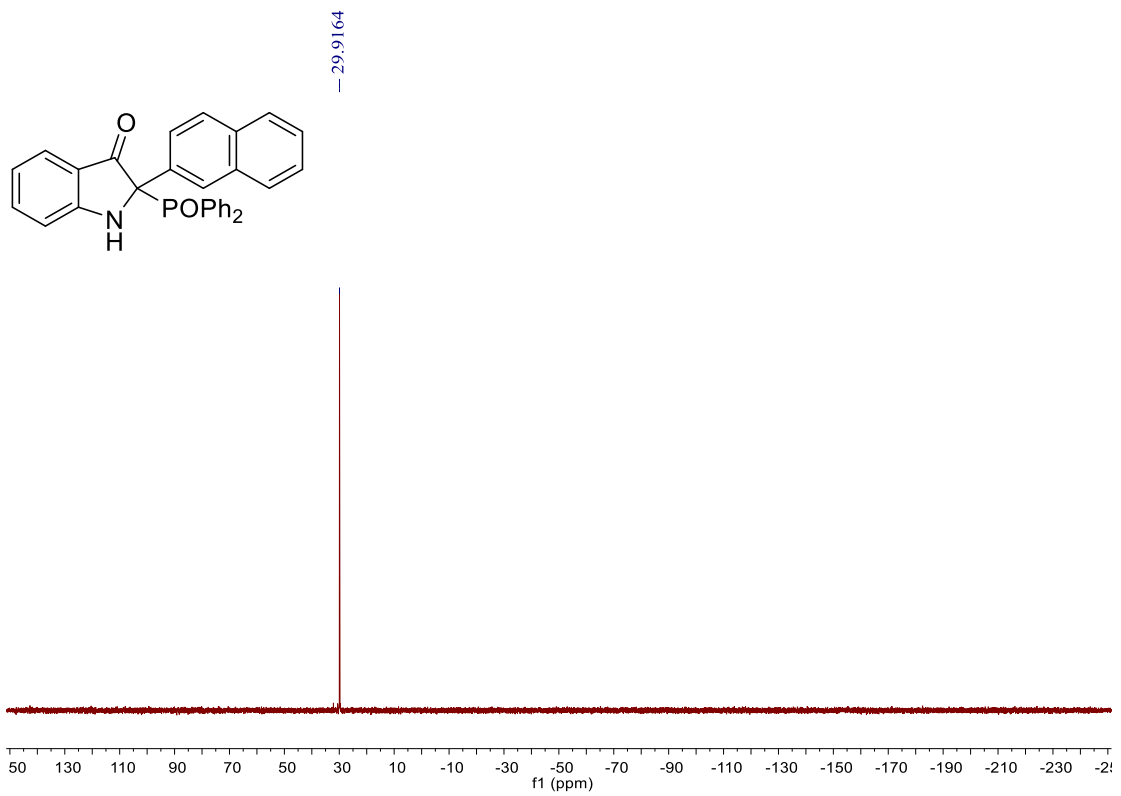

**2-(tert-butyl)-2-(diphenylphosphoryl)indolin-3-one (3l).**

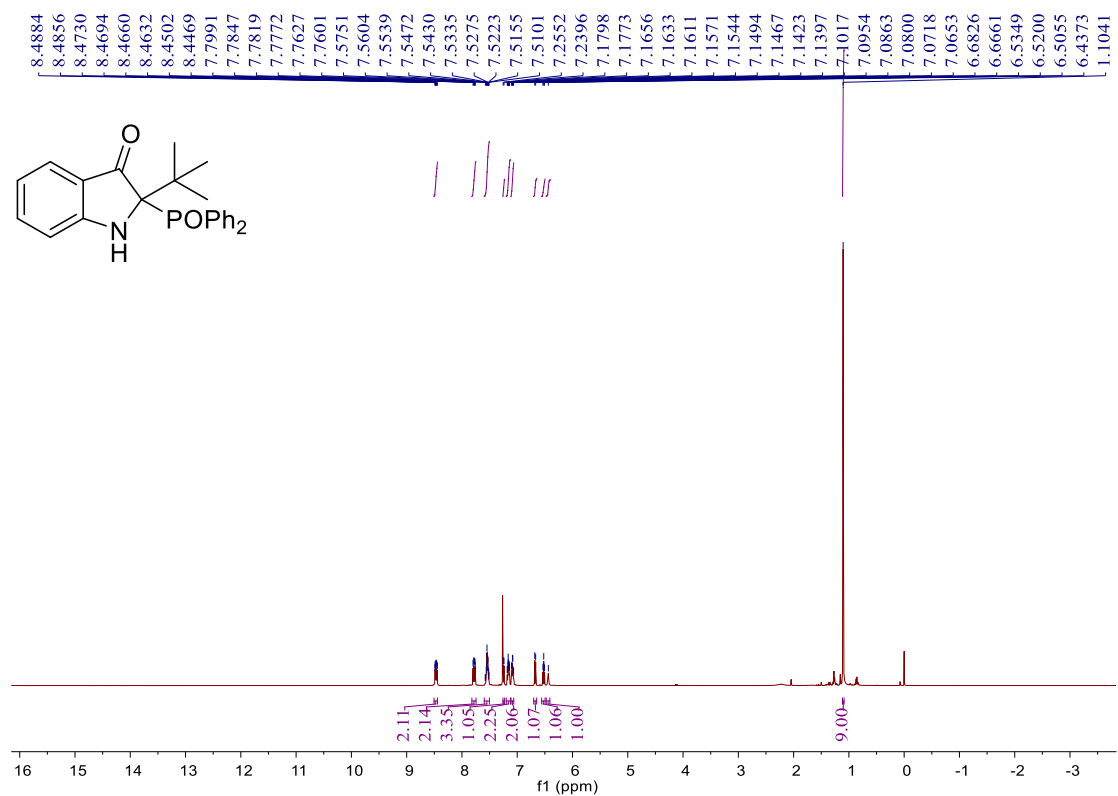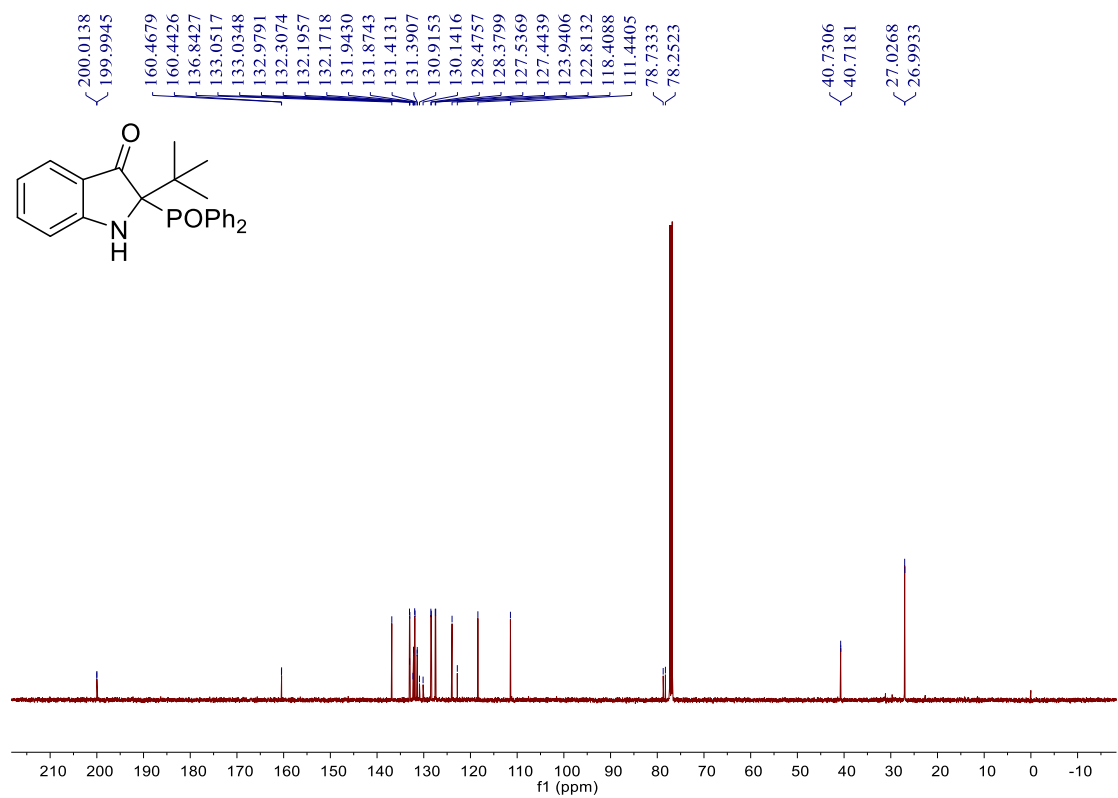

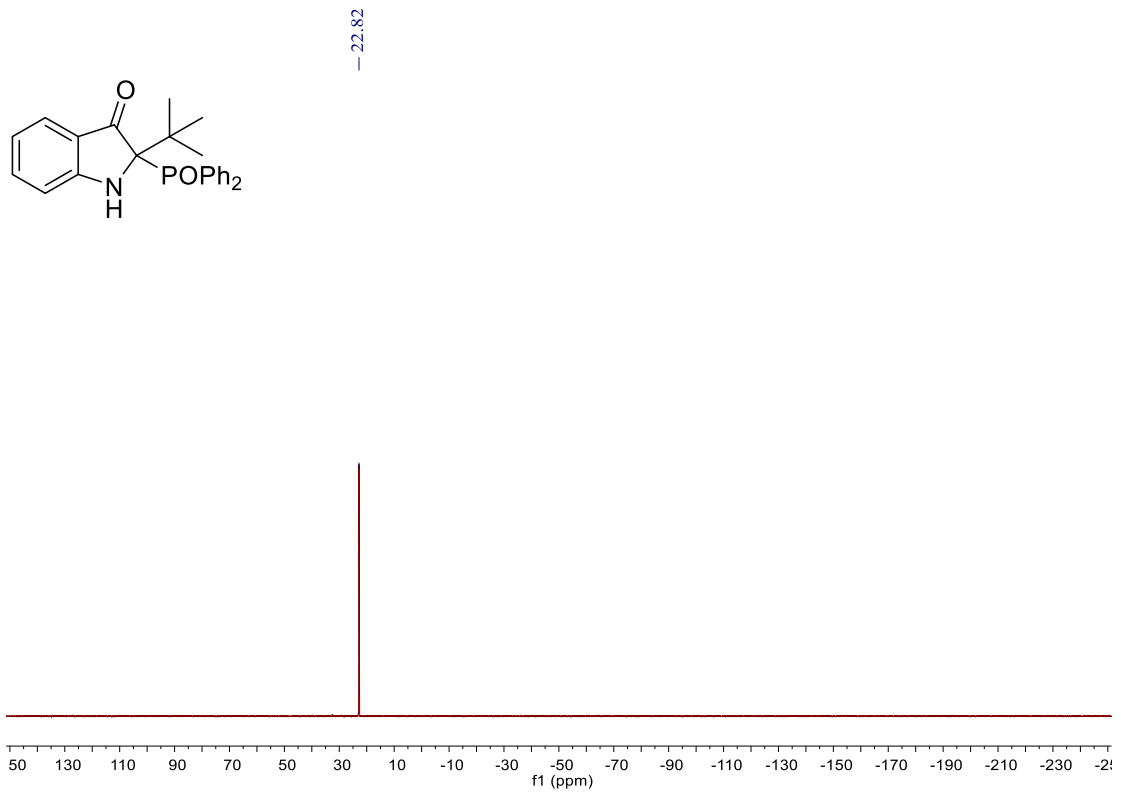

**2-(bis(4-methoxyphenyl)phosphoryl)-2-phenylindolin-3-one (3m)**

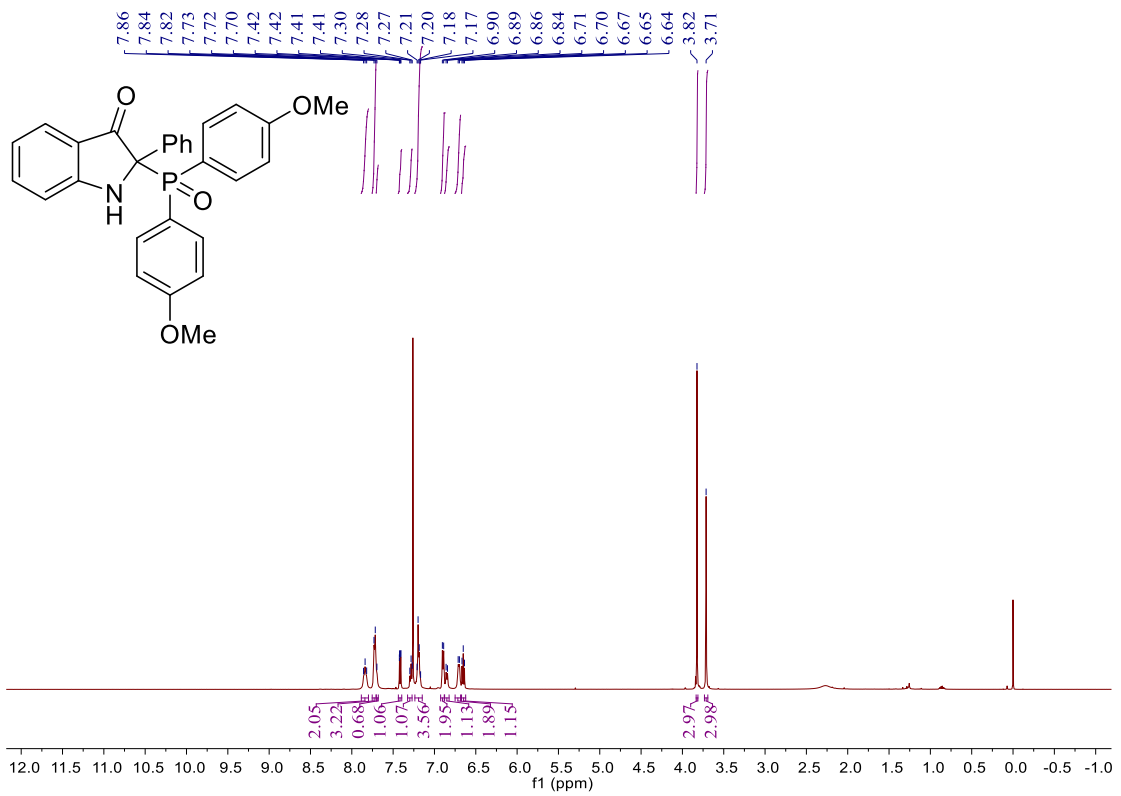

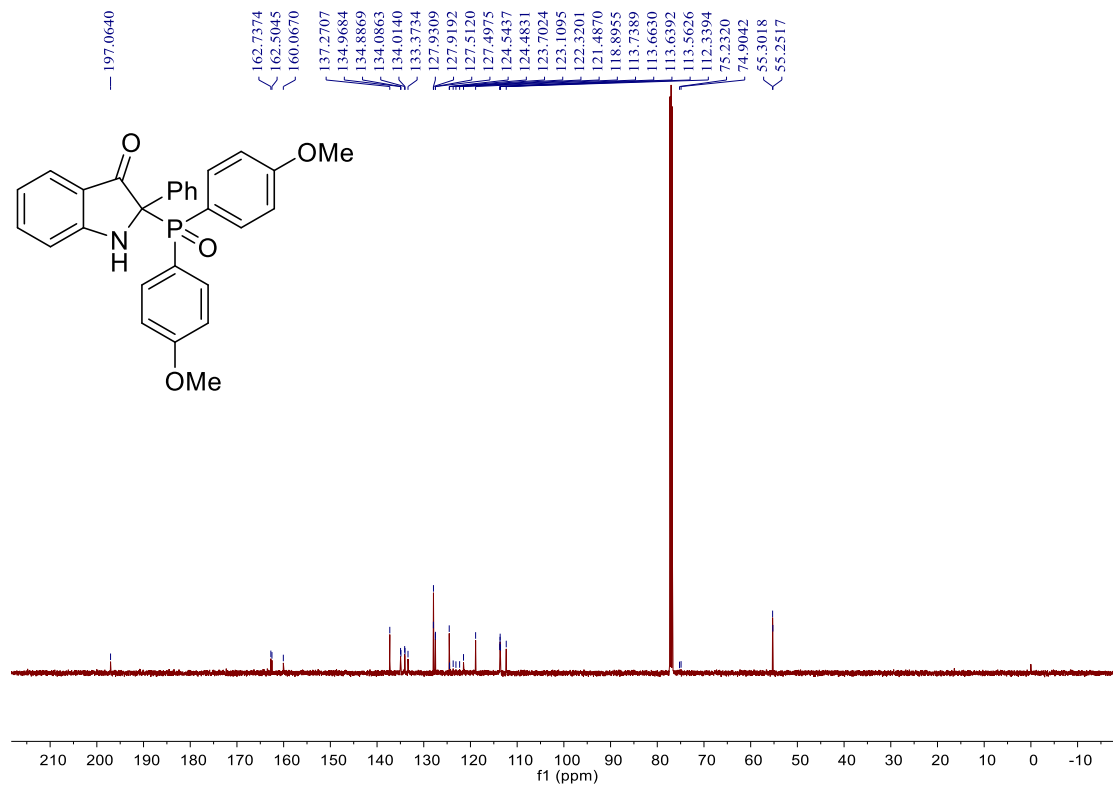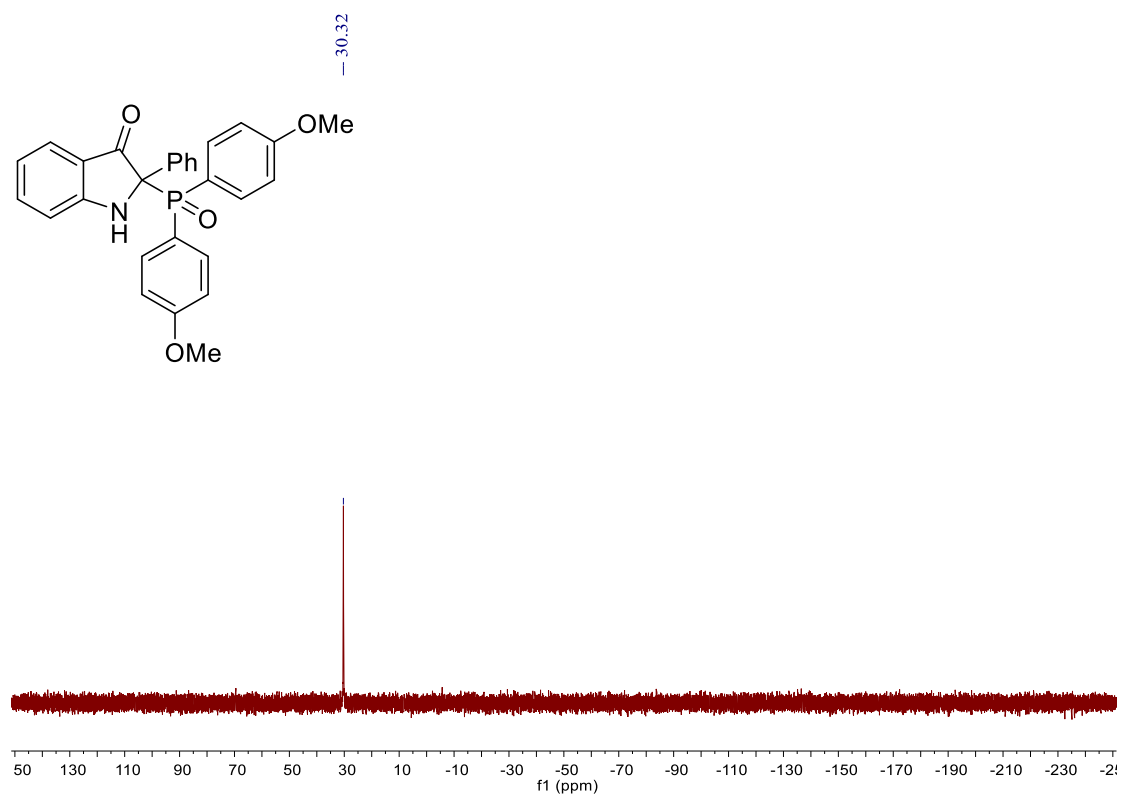

**2-(bis(benzo[d][1,3]dioxol-4-yl)phosphoryl)-2-phenylindolin-3-one (3n)**

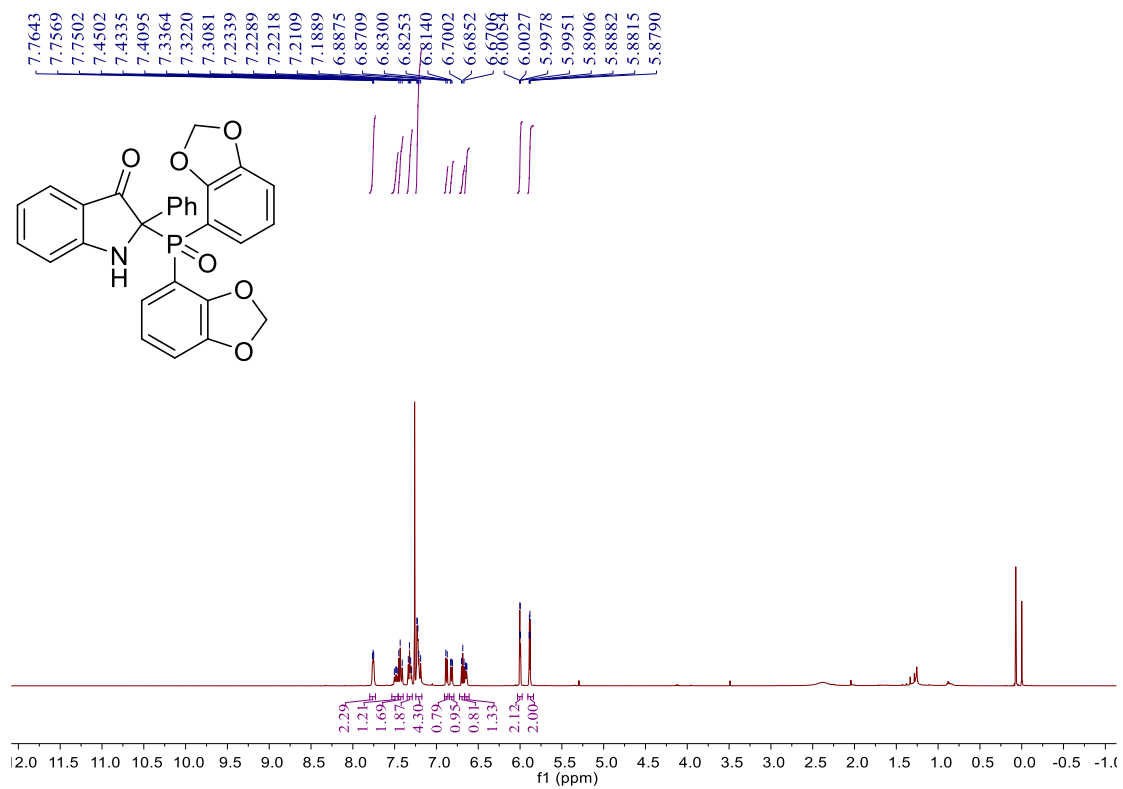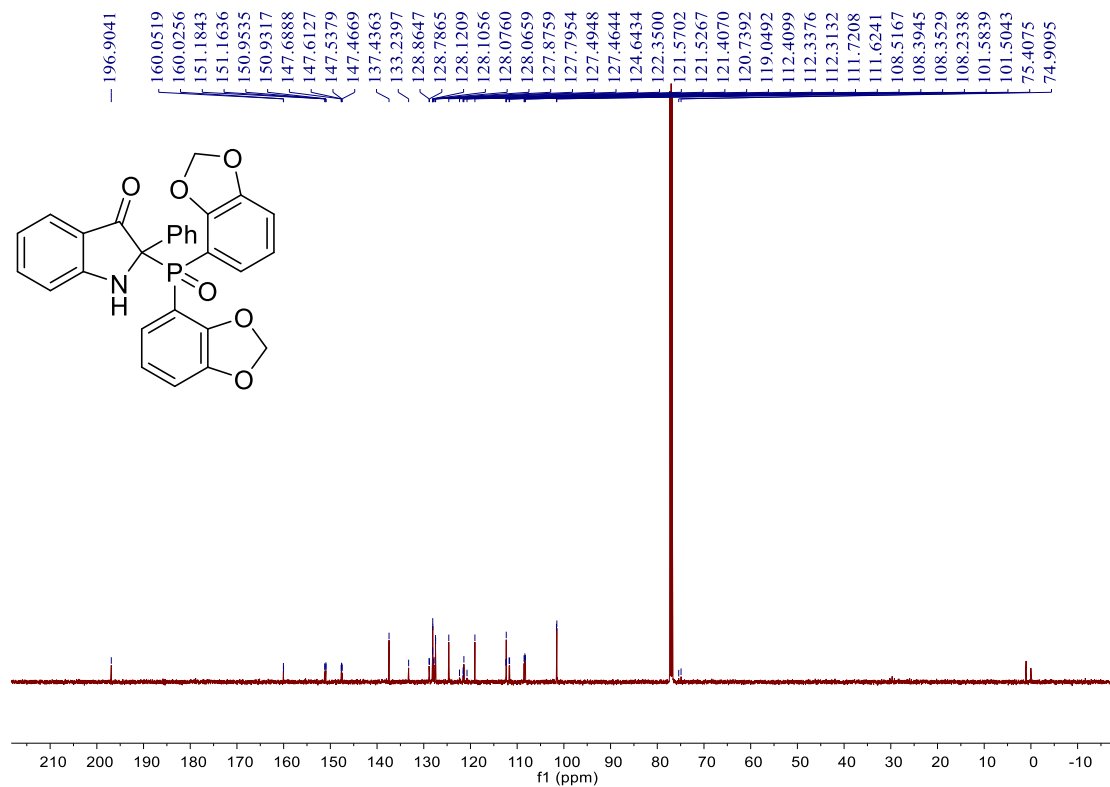

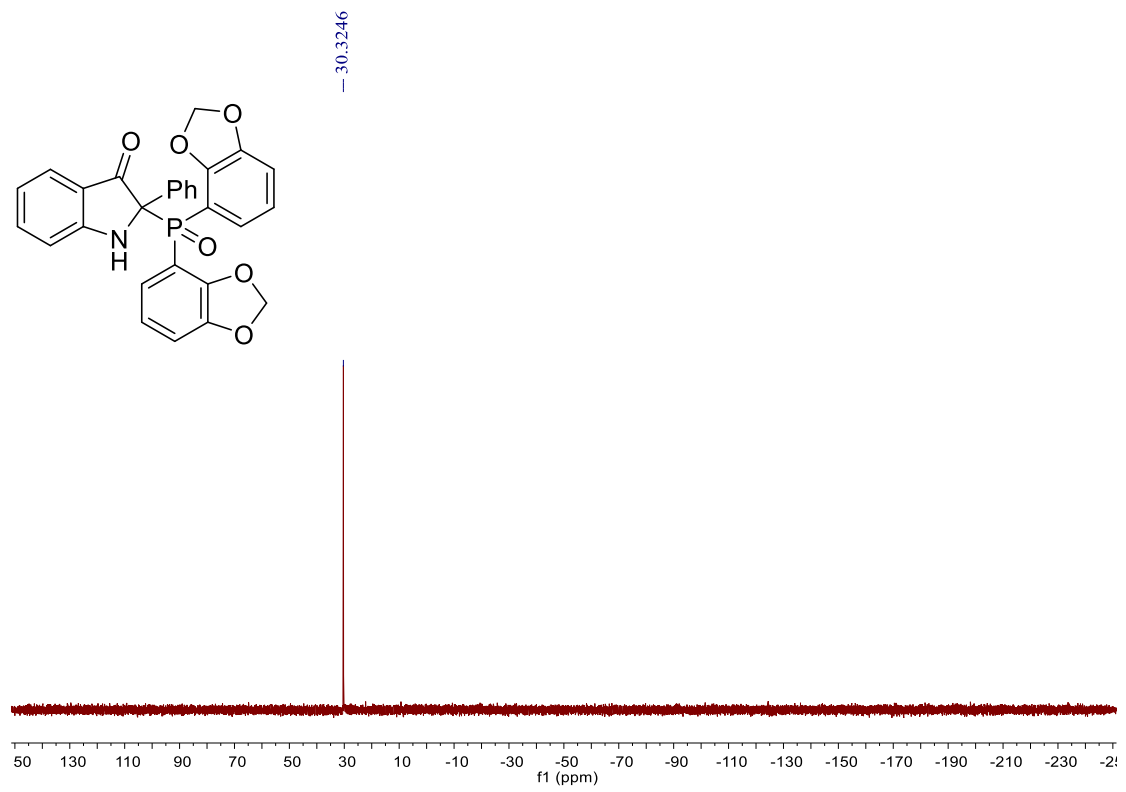

**2-(bis(4-(tert-butyl)phenyl)phosphoryl)-2-phenylindolin-3-one (3o)**

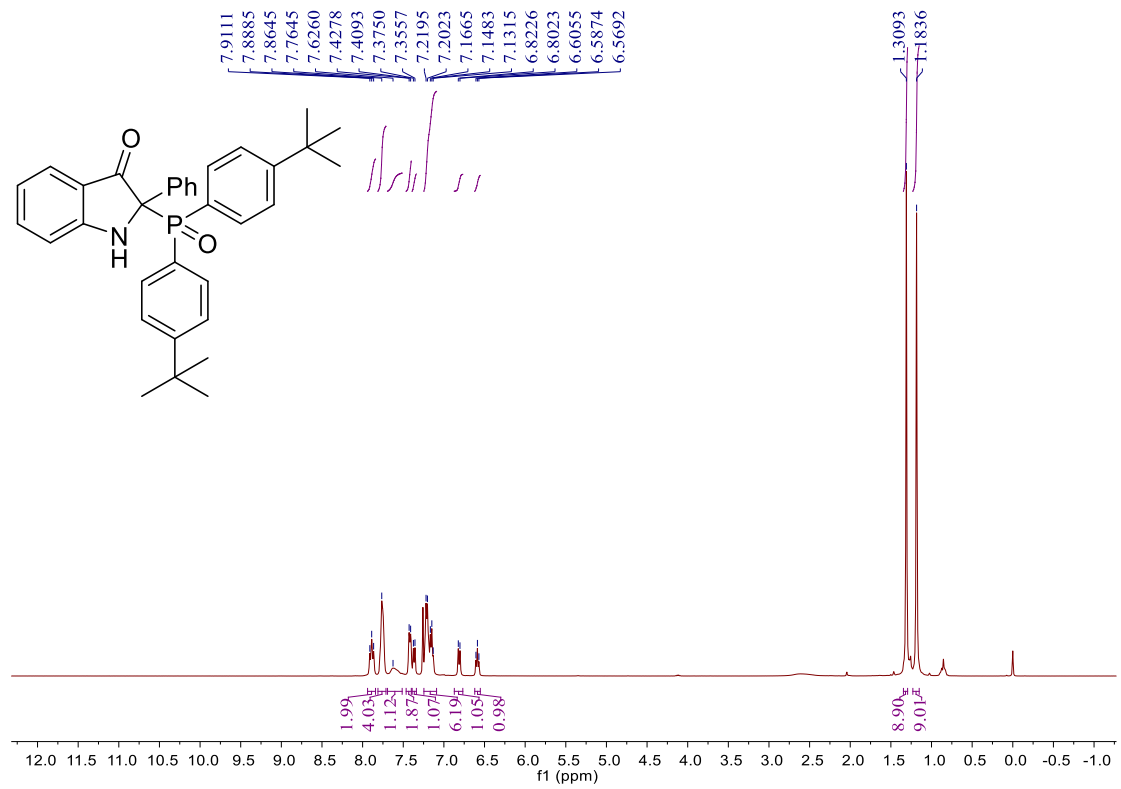

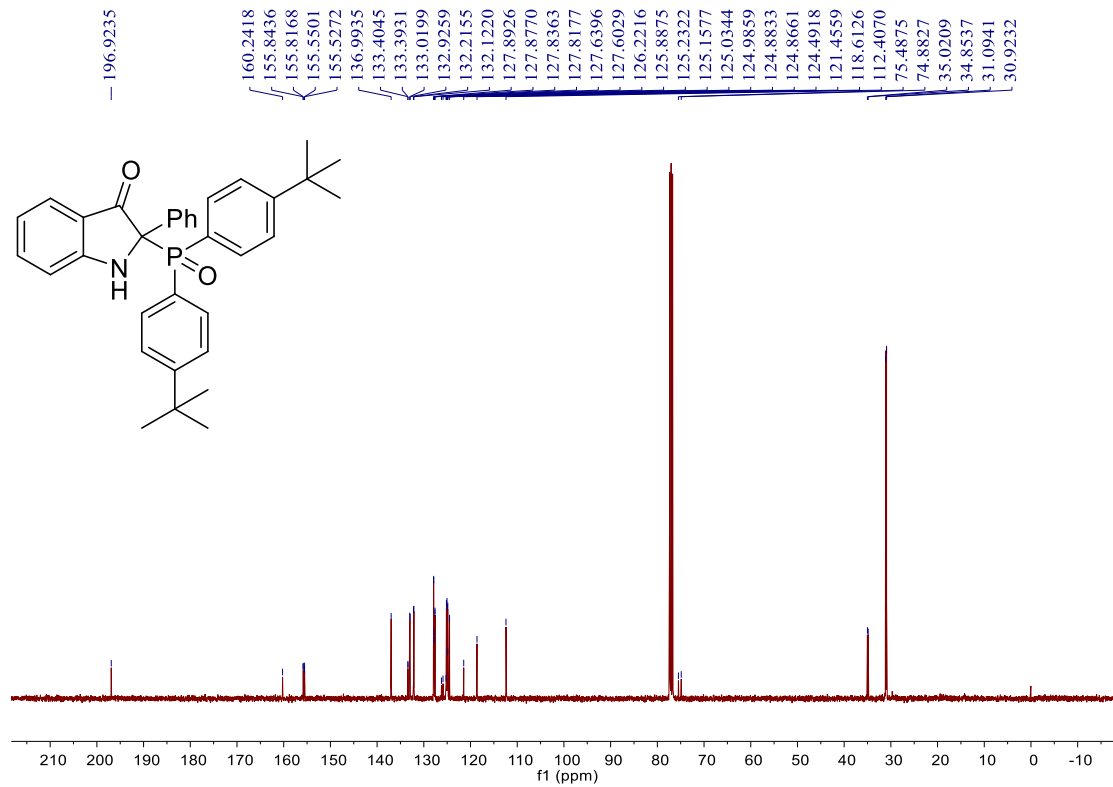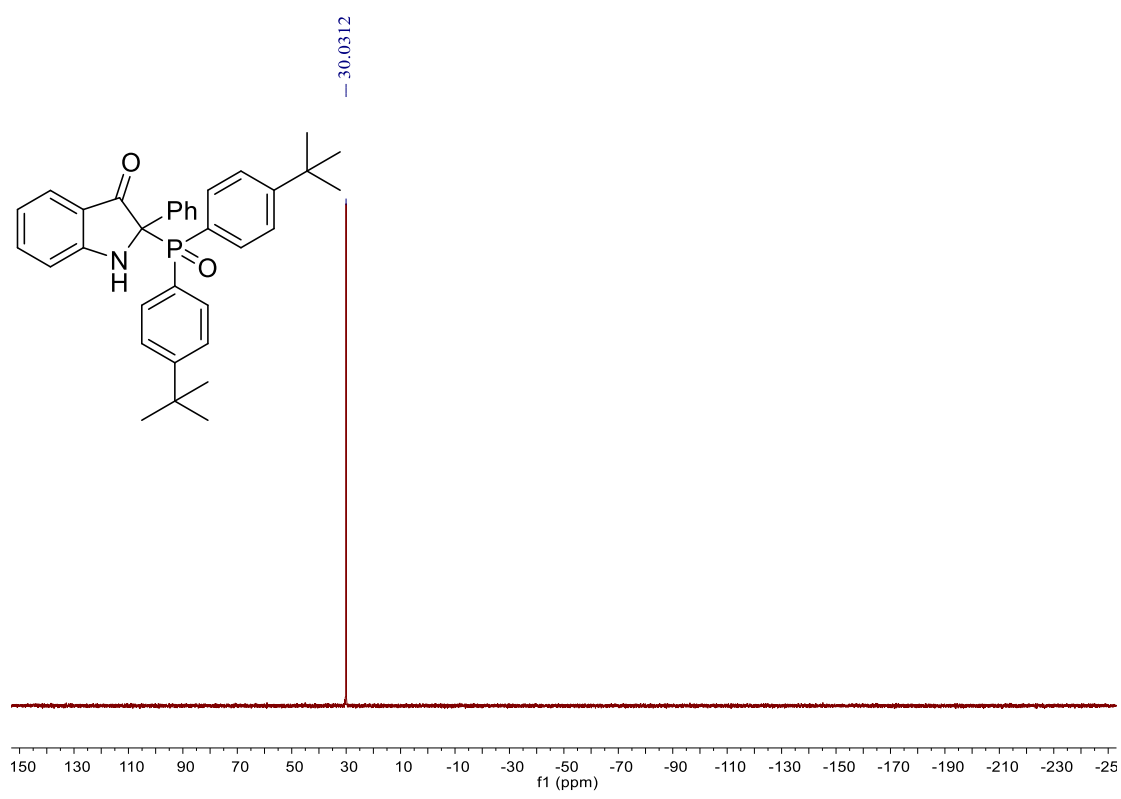



**2-(di-p-tolylphosphoryl)-2-phenylindolin-3-one (3p)**

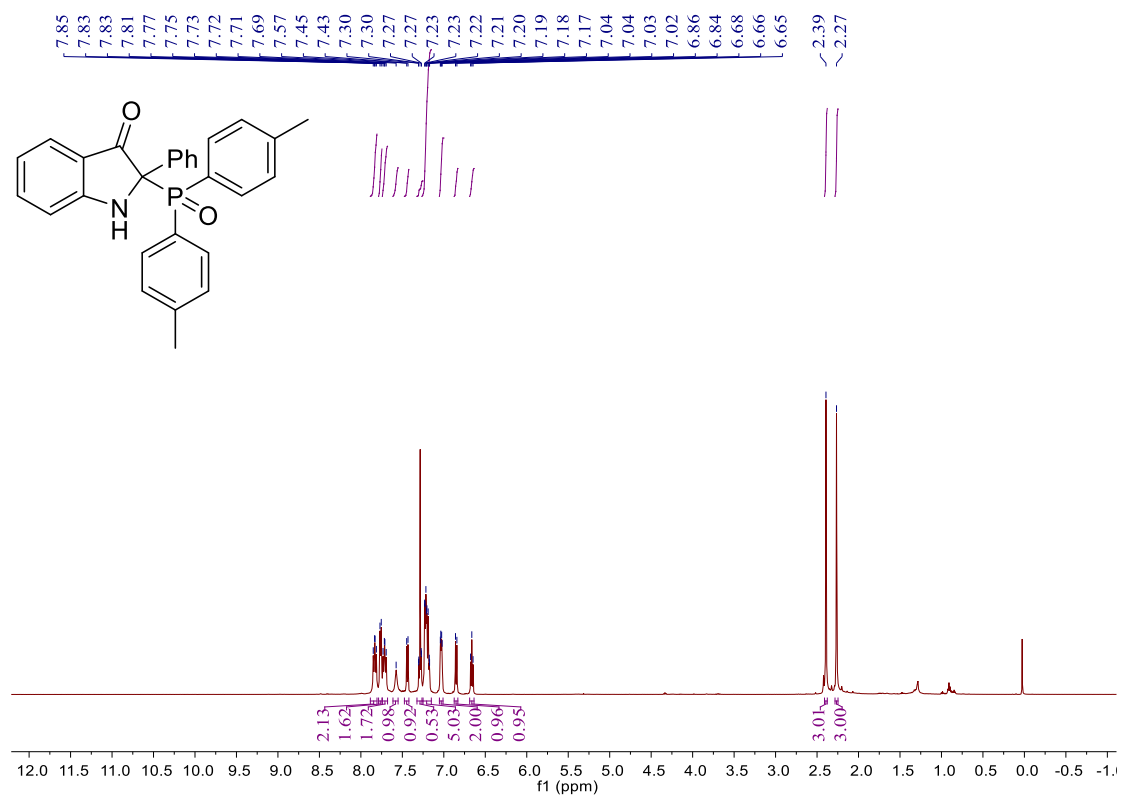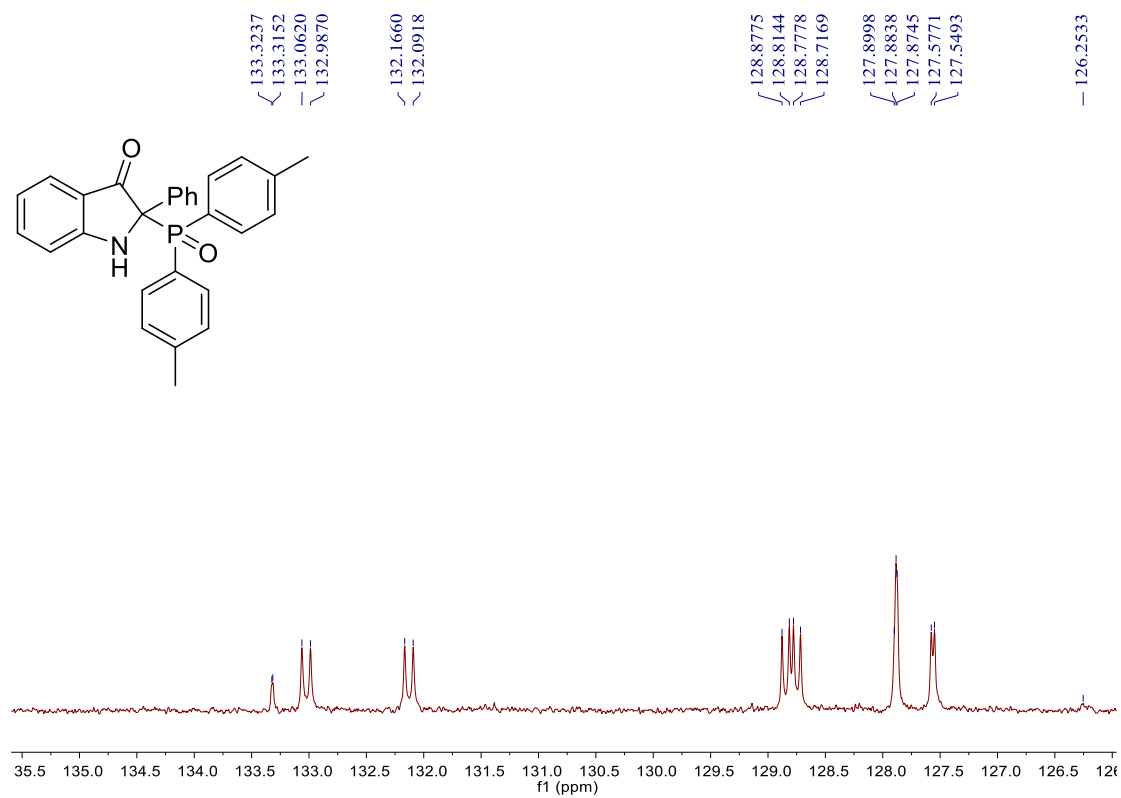

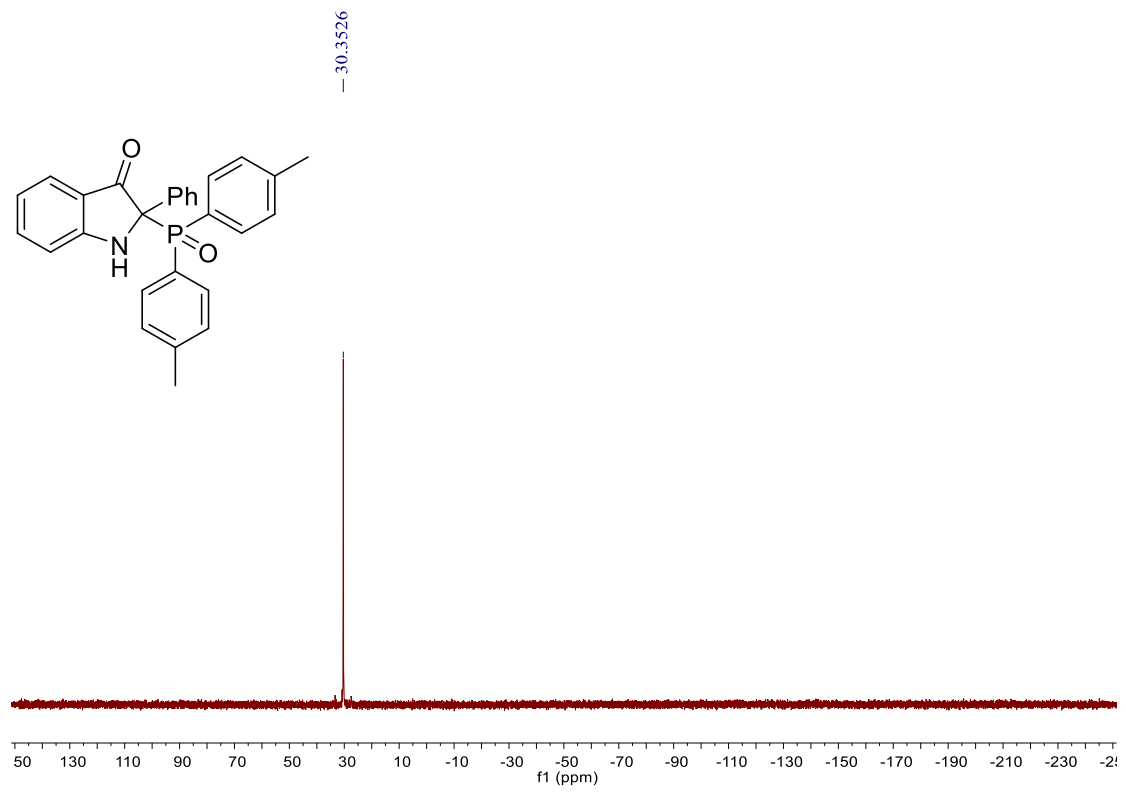

**2-((2,4-dimethylphenyl)(3,5-dimethylphenyl)phosphoryl)-2-phenylindolin-3-one (3q)**

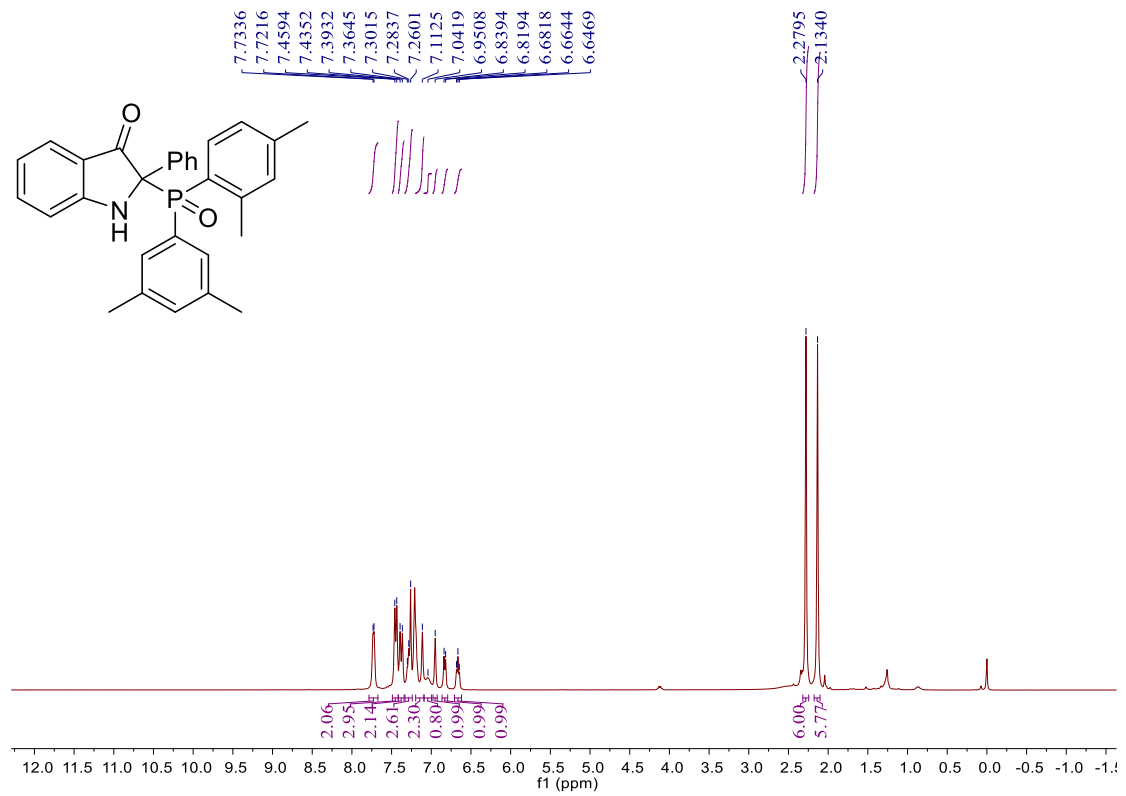

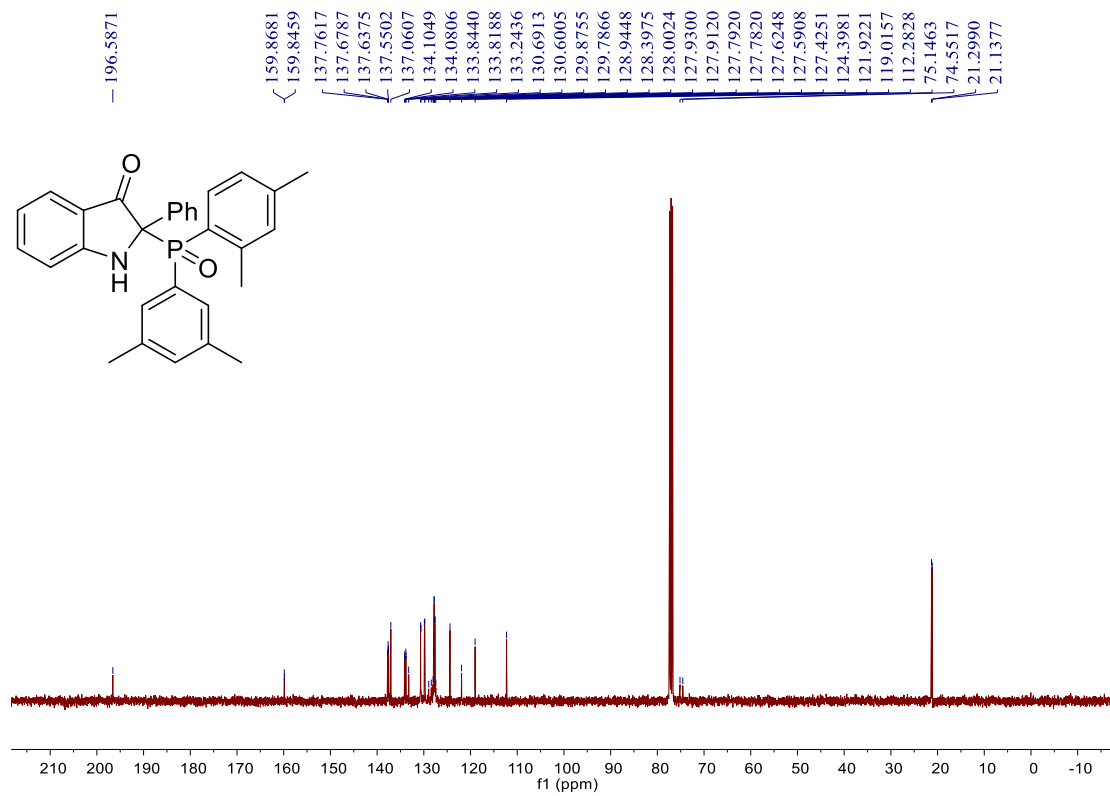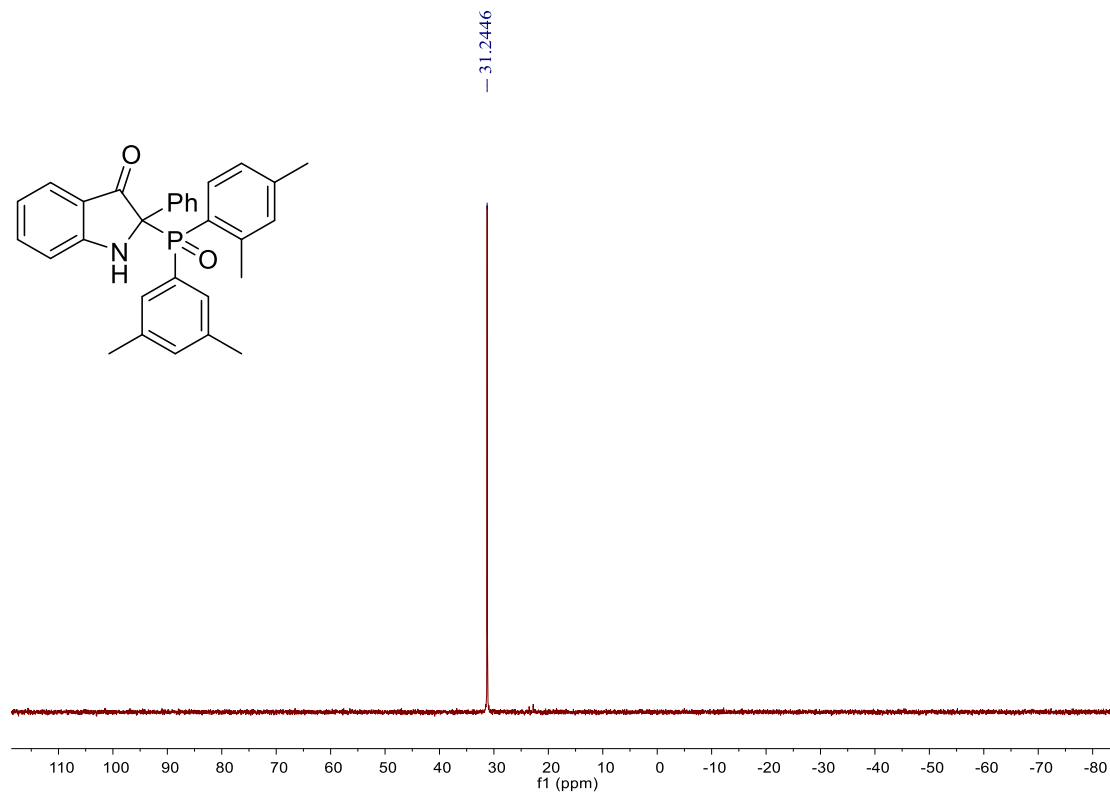

**2-(di-m-tolylphosphoryl)-2-phenylindolin-3-one (3r)**

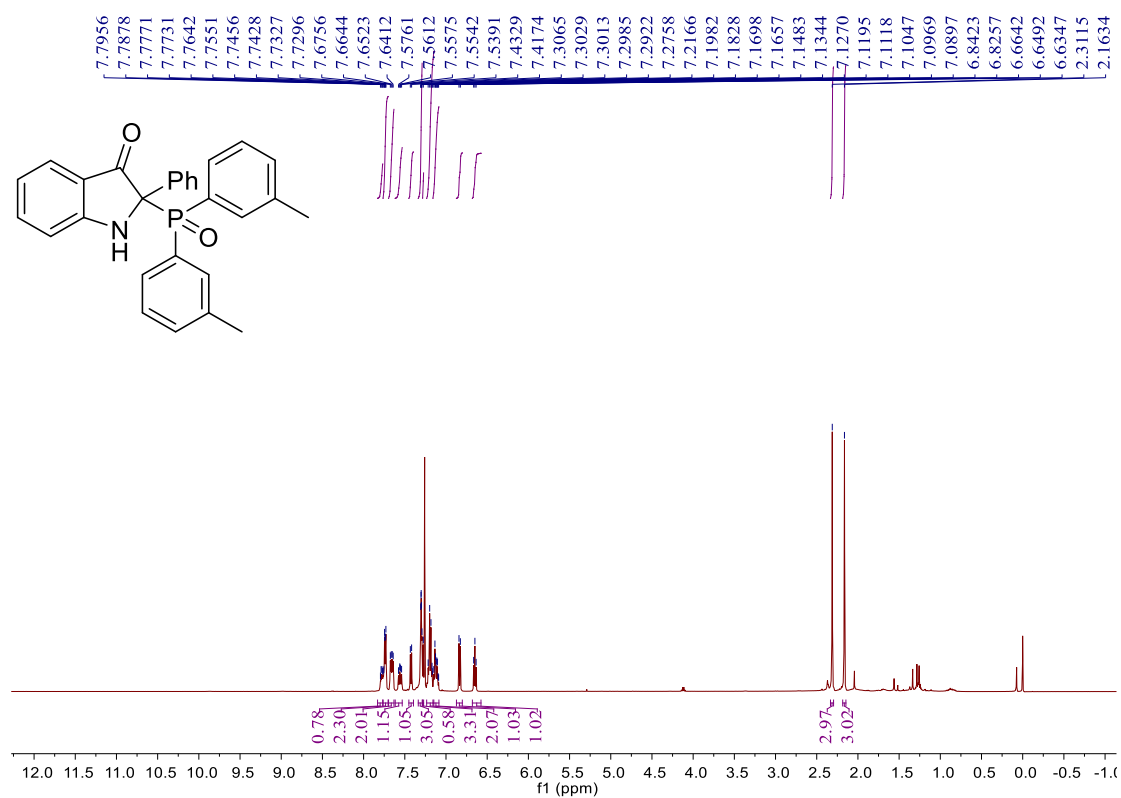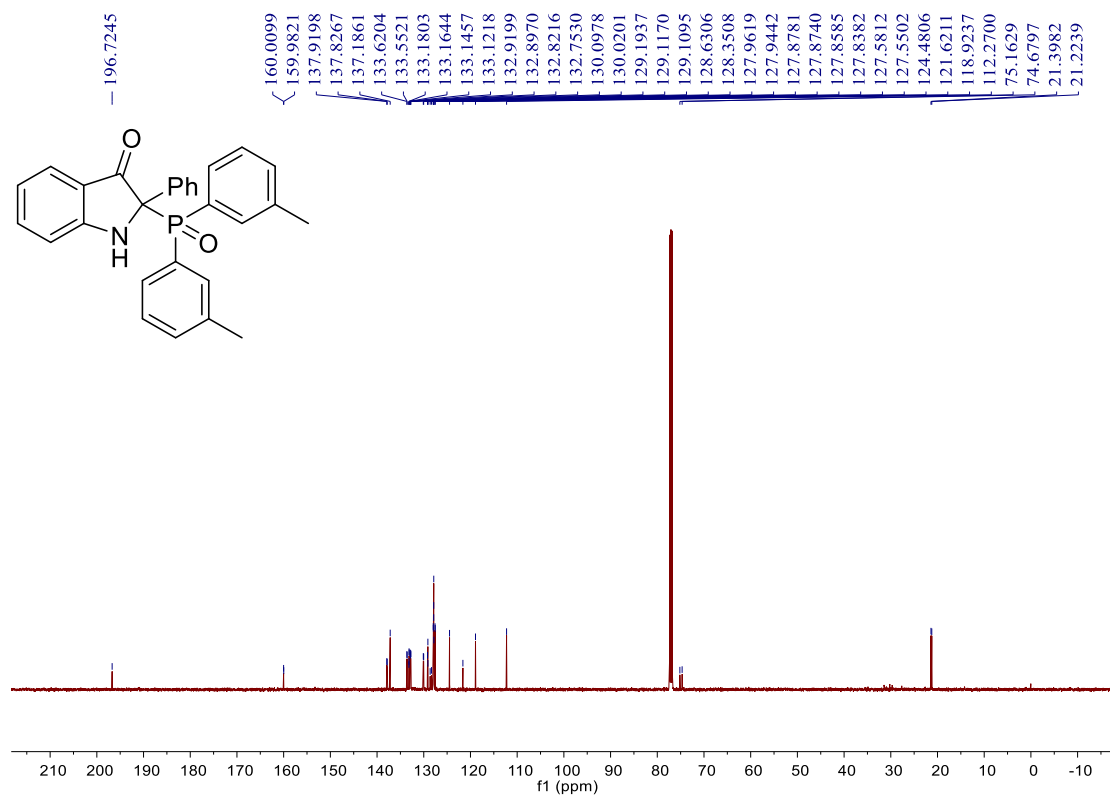

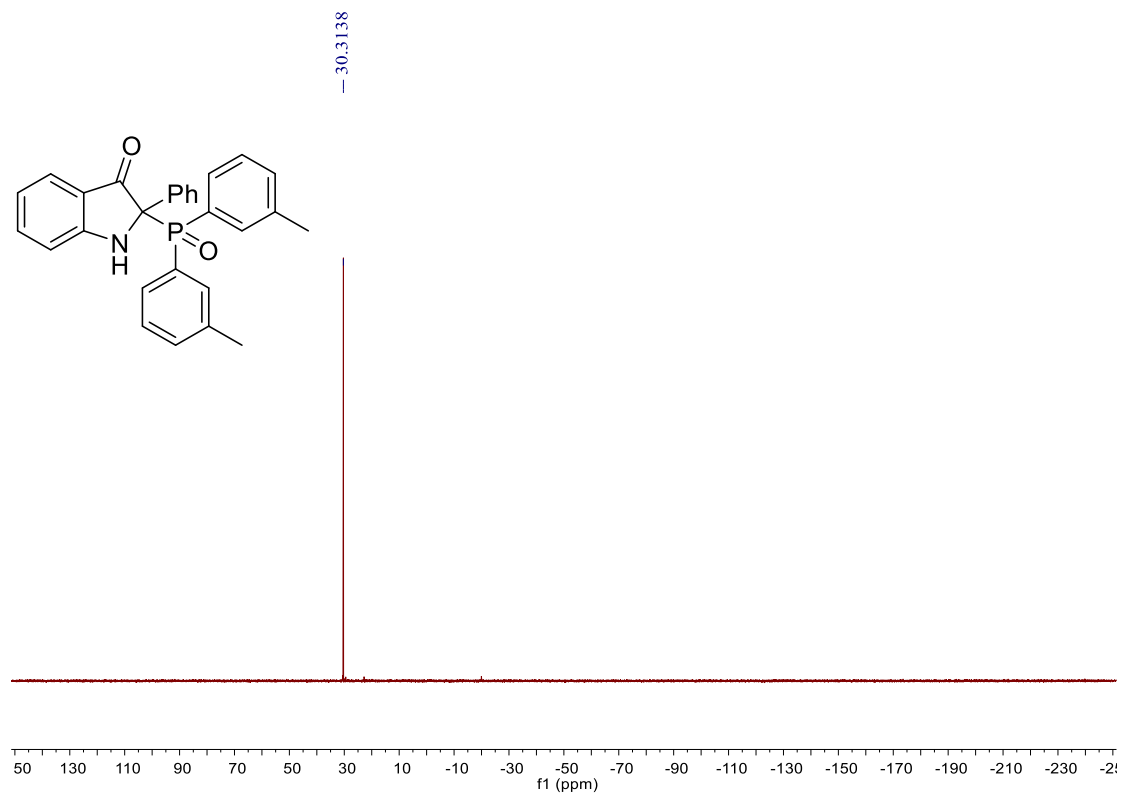

**2-((4-fluoro-3-methylphenyl)(3-fluoro-4-methylphenyl)phosphoryl)-2-phenylindolin-3-one (3s)**

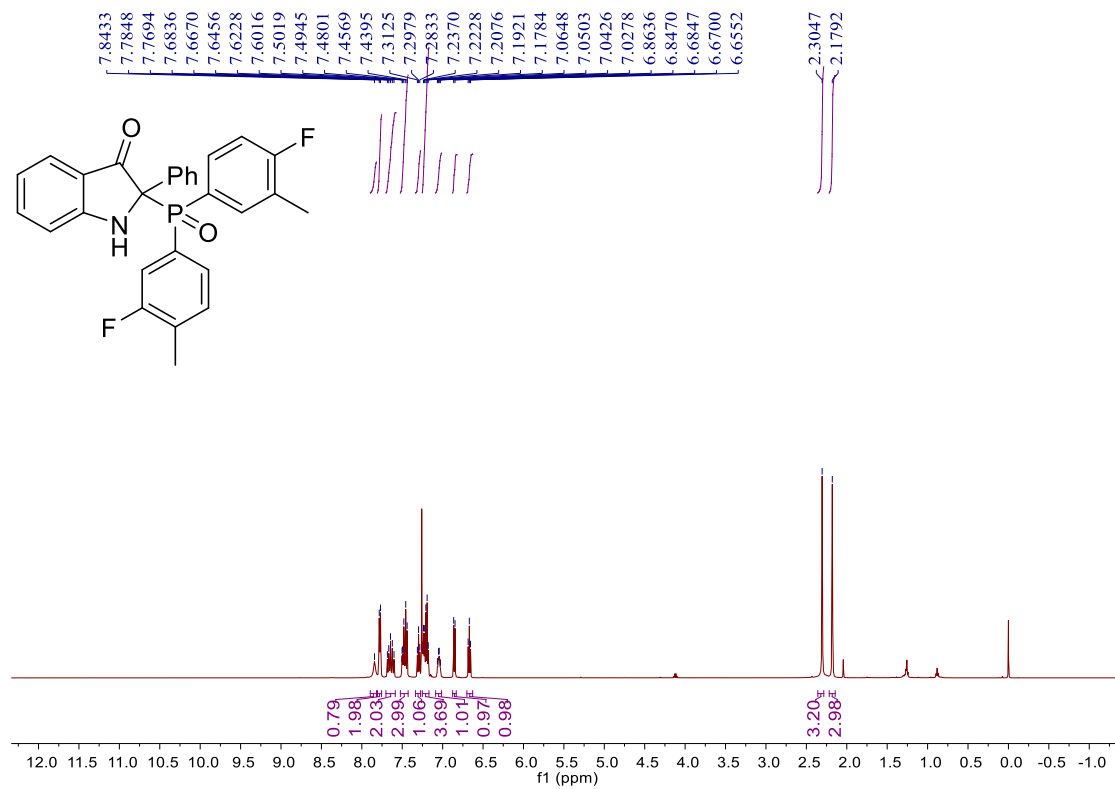

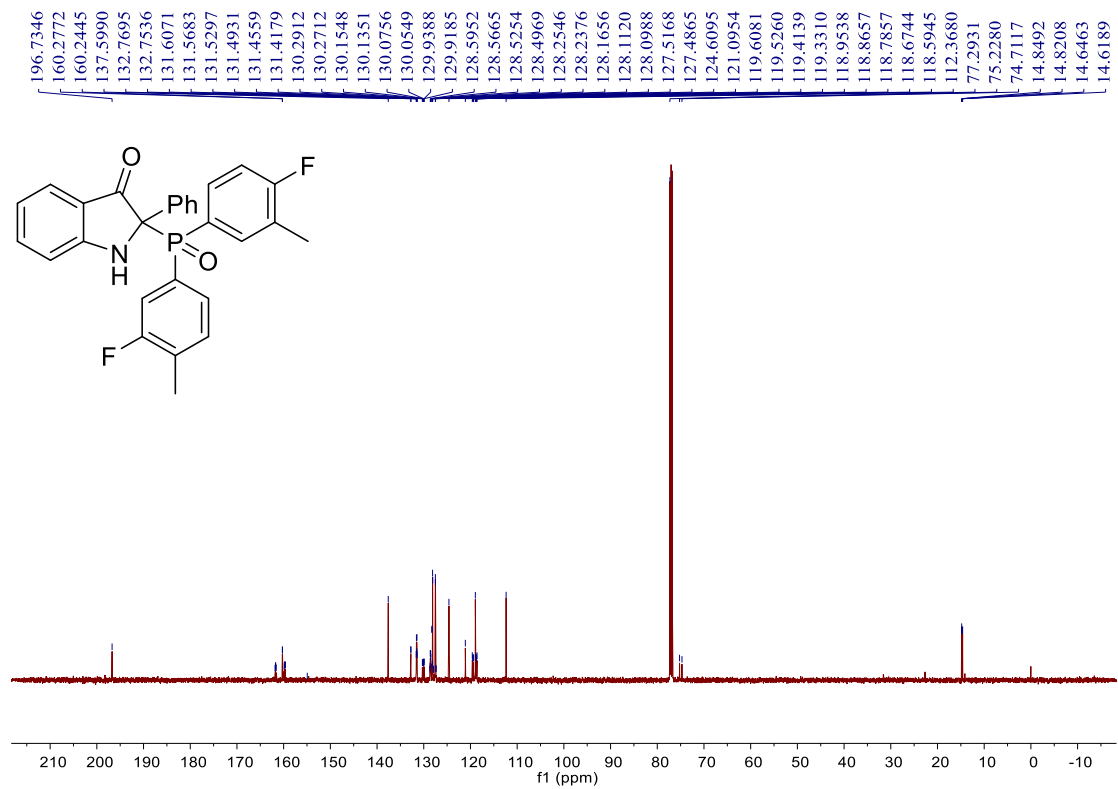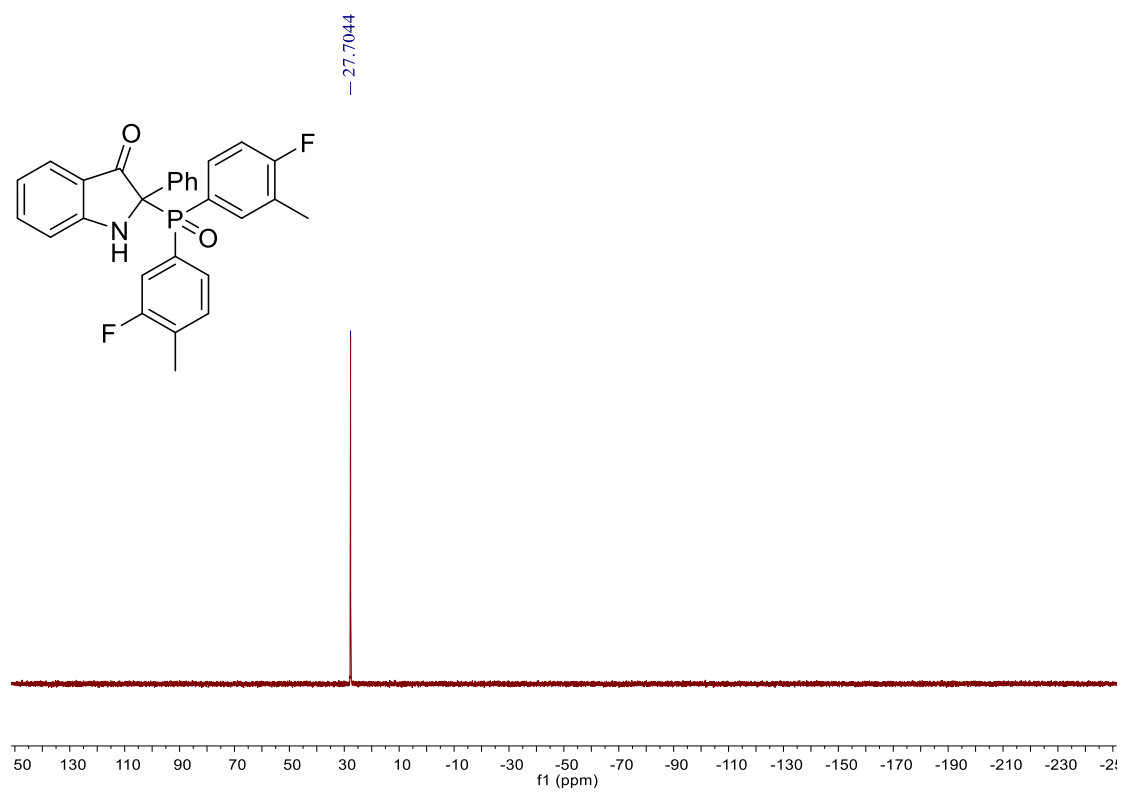

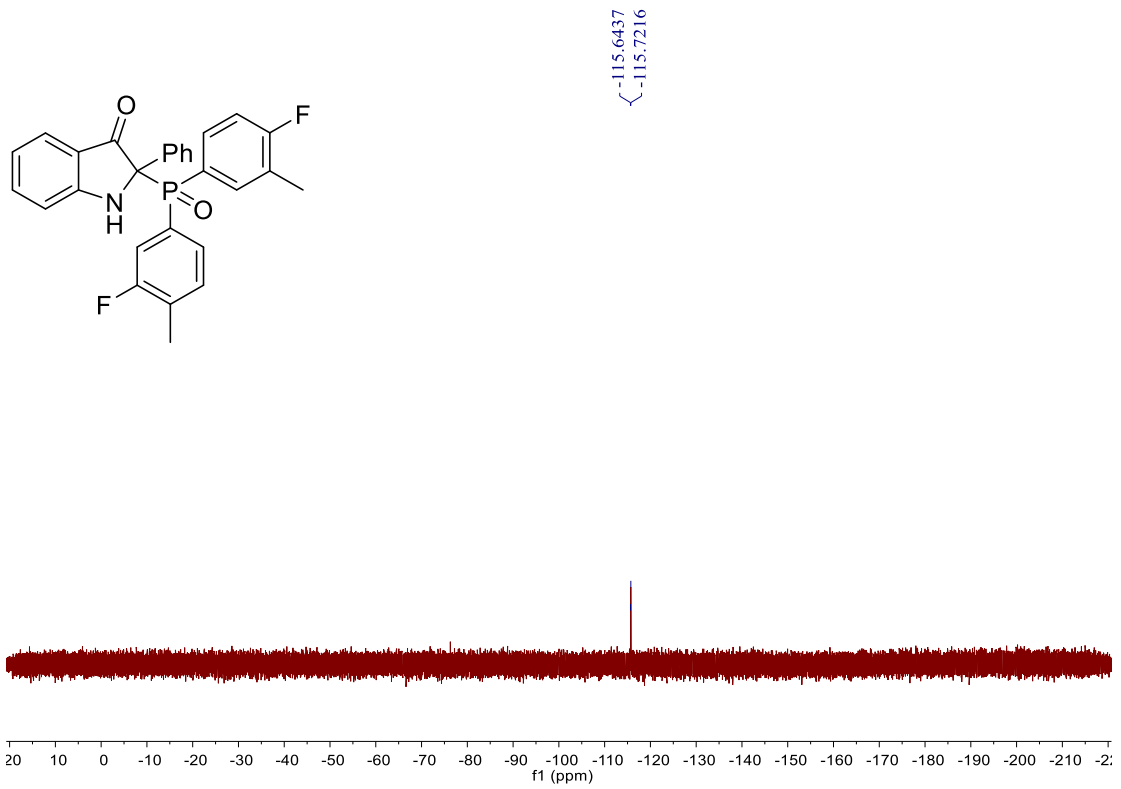

**2-(bis(4-fluorophenyl)phosphoryl)-2-phenylindolin-3-one (3t)**

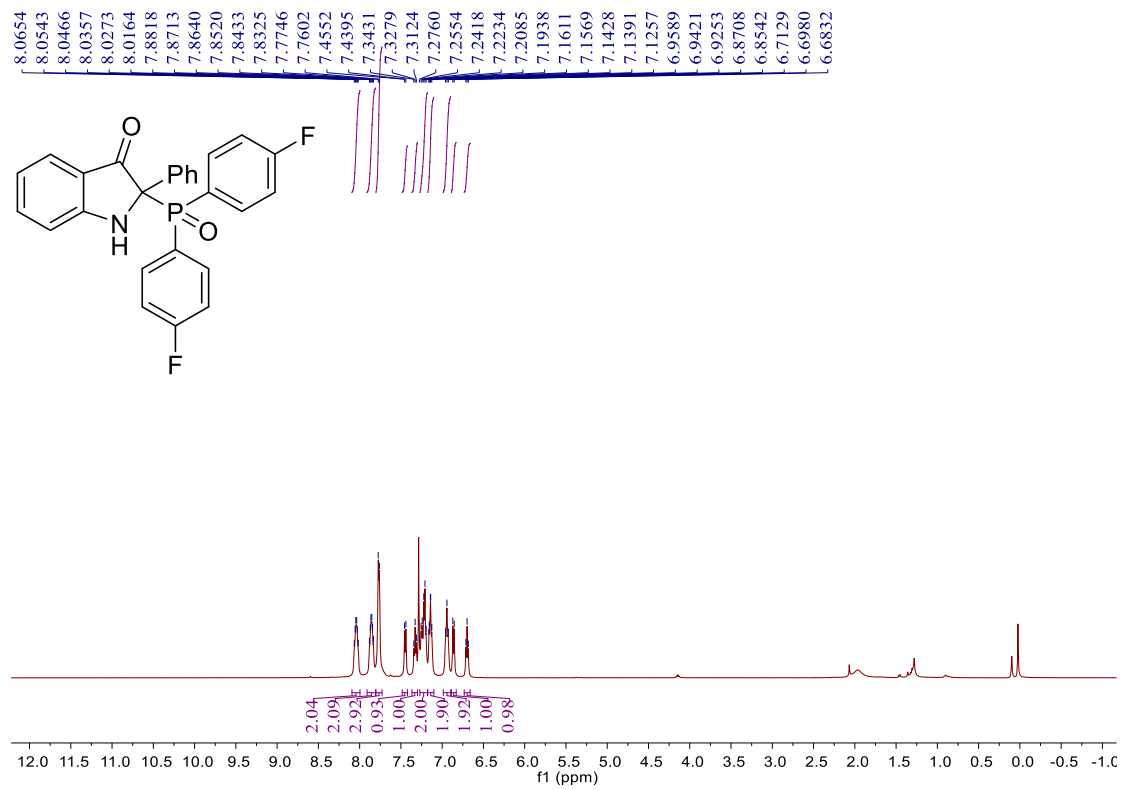

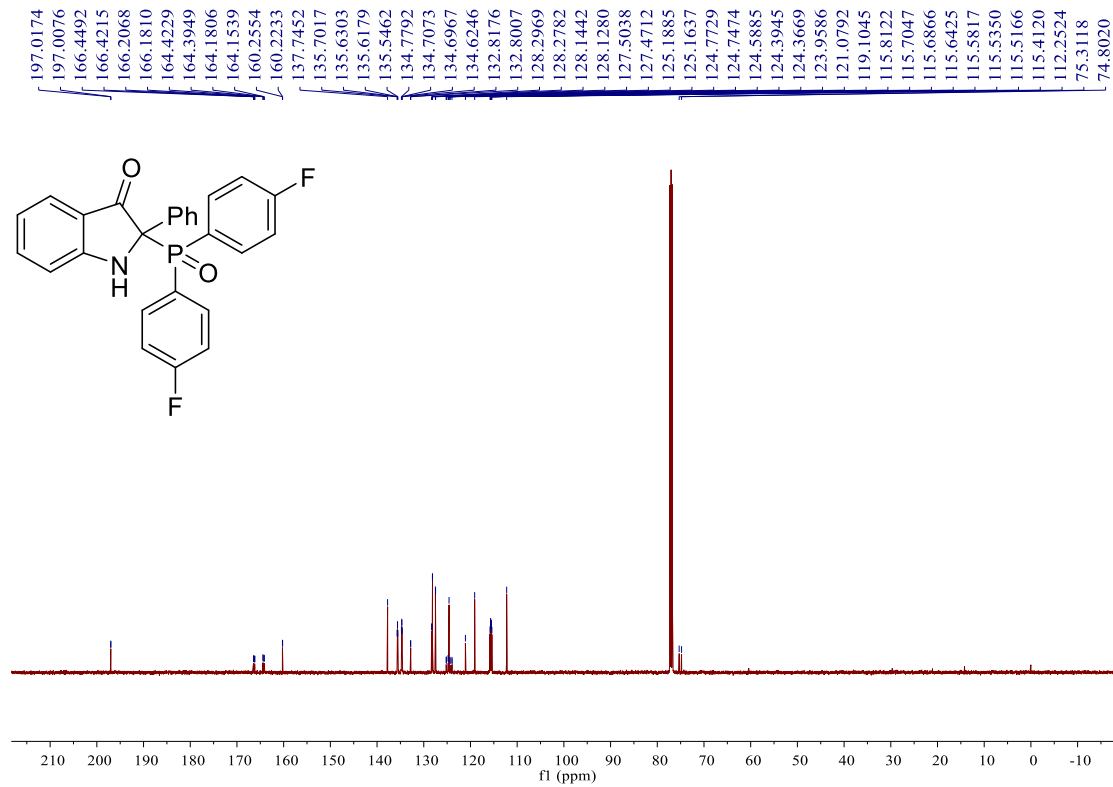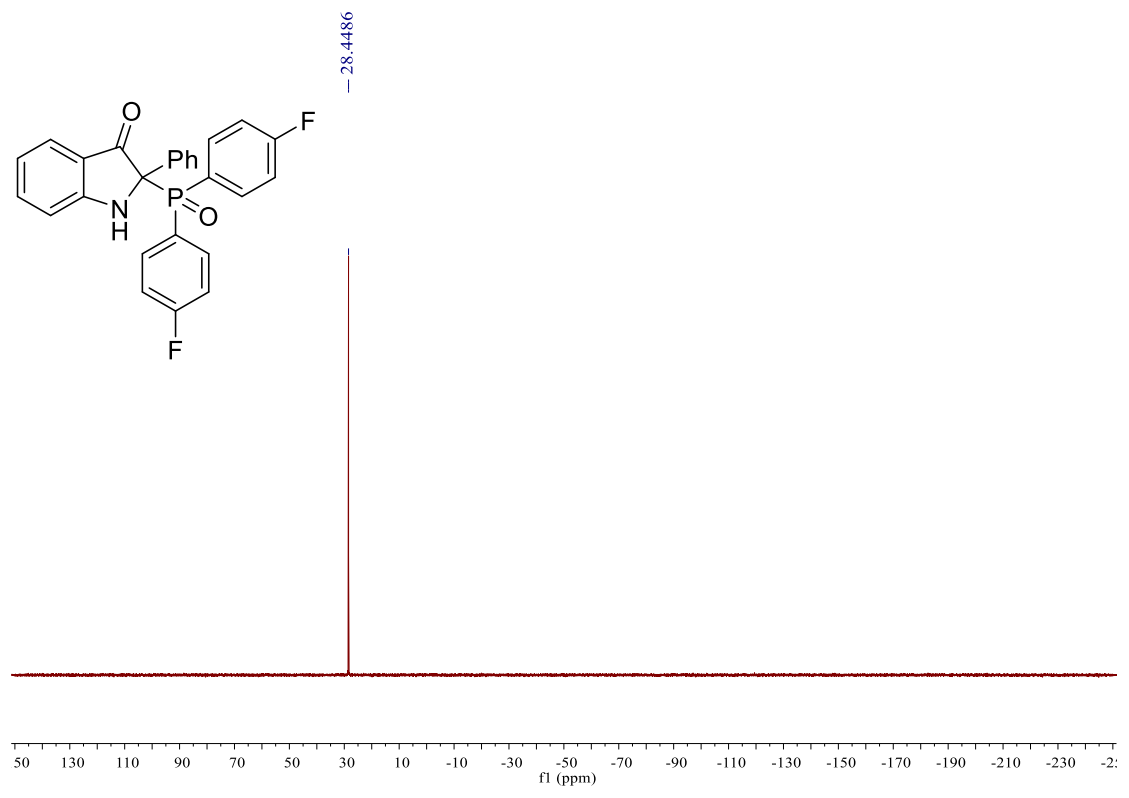



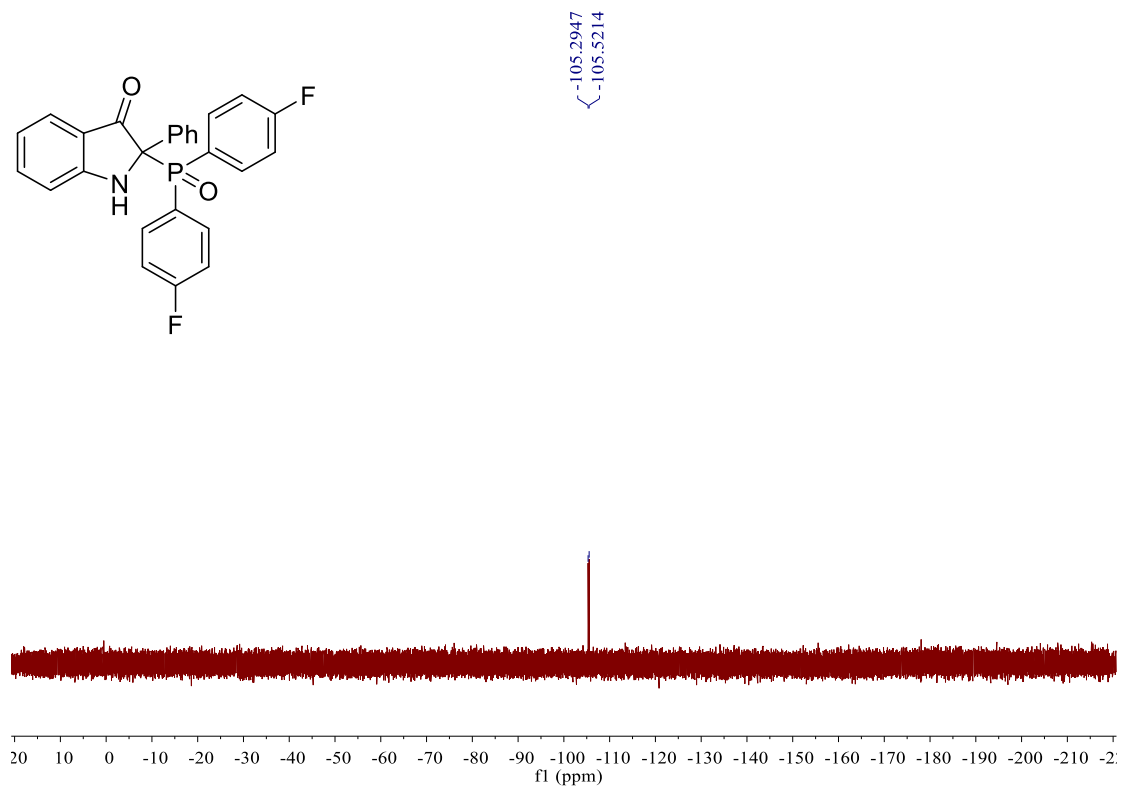

**2-(bis(4-chlorophenyl)phosphoryl)-2-phenylindolin-3-one (3u)**

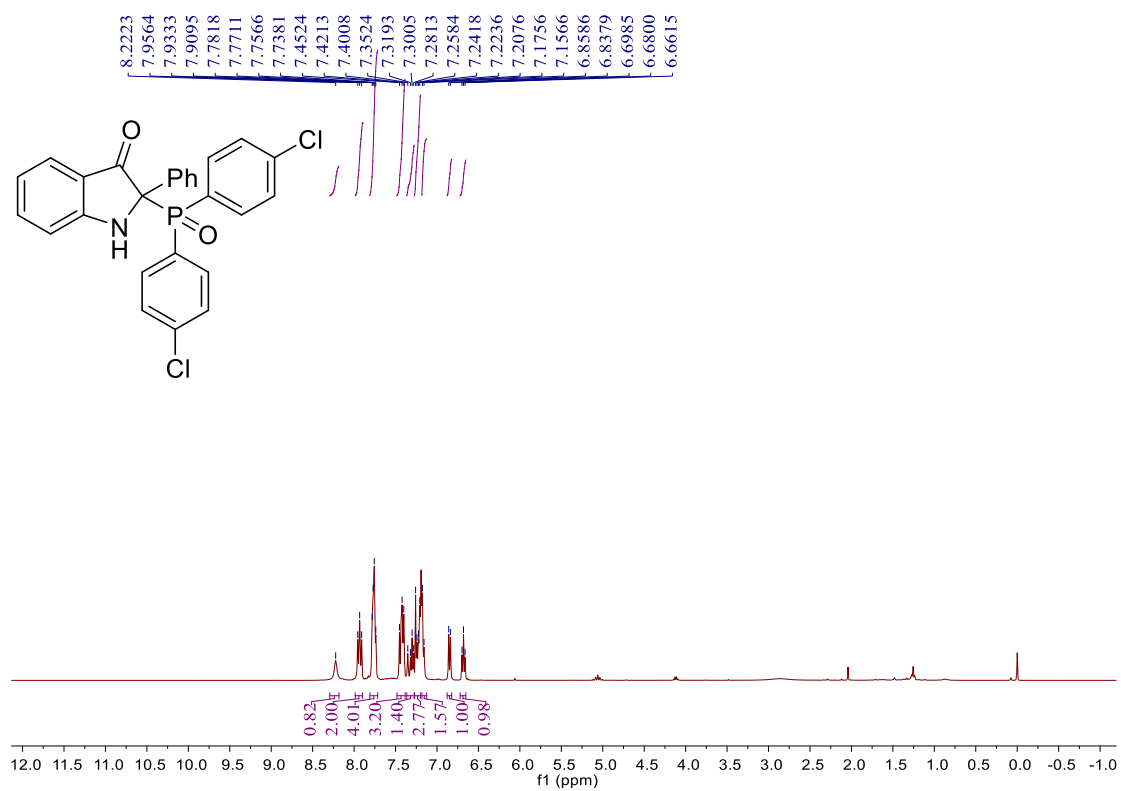

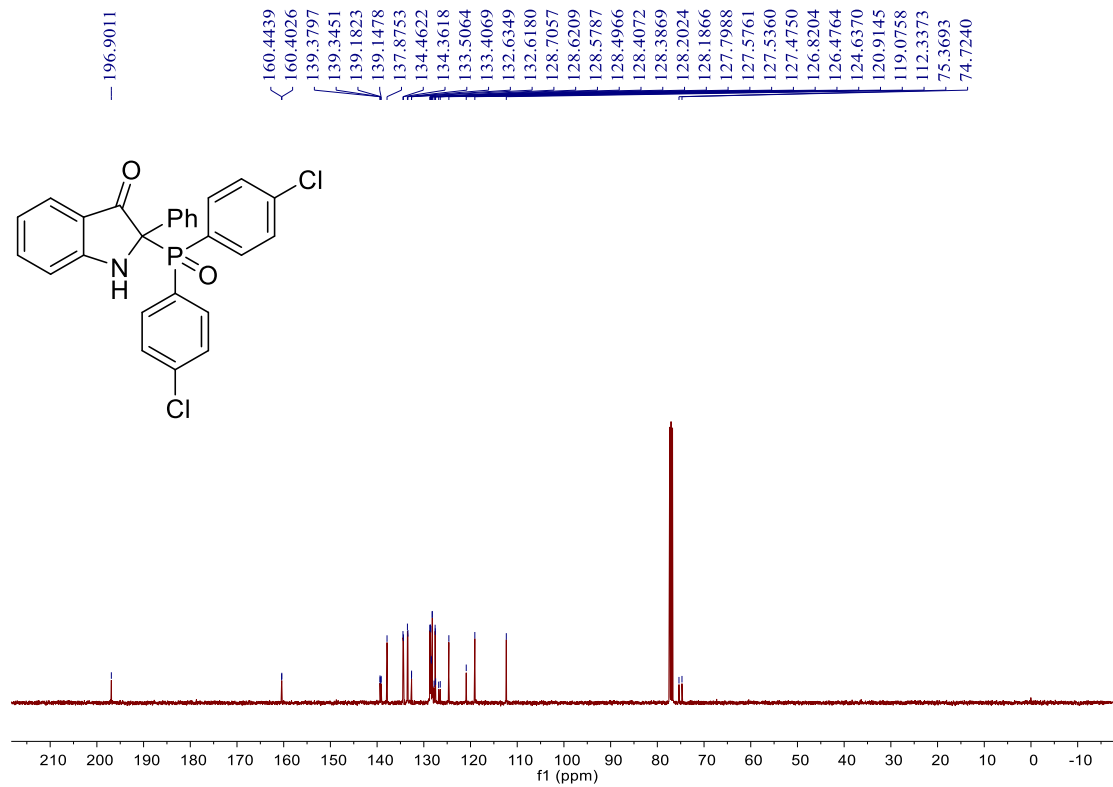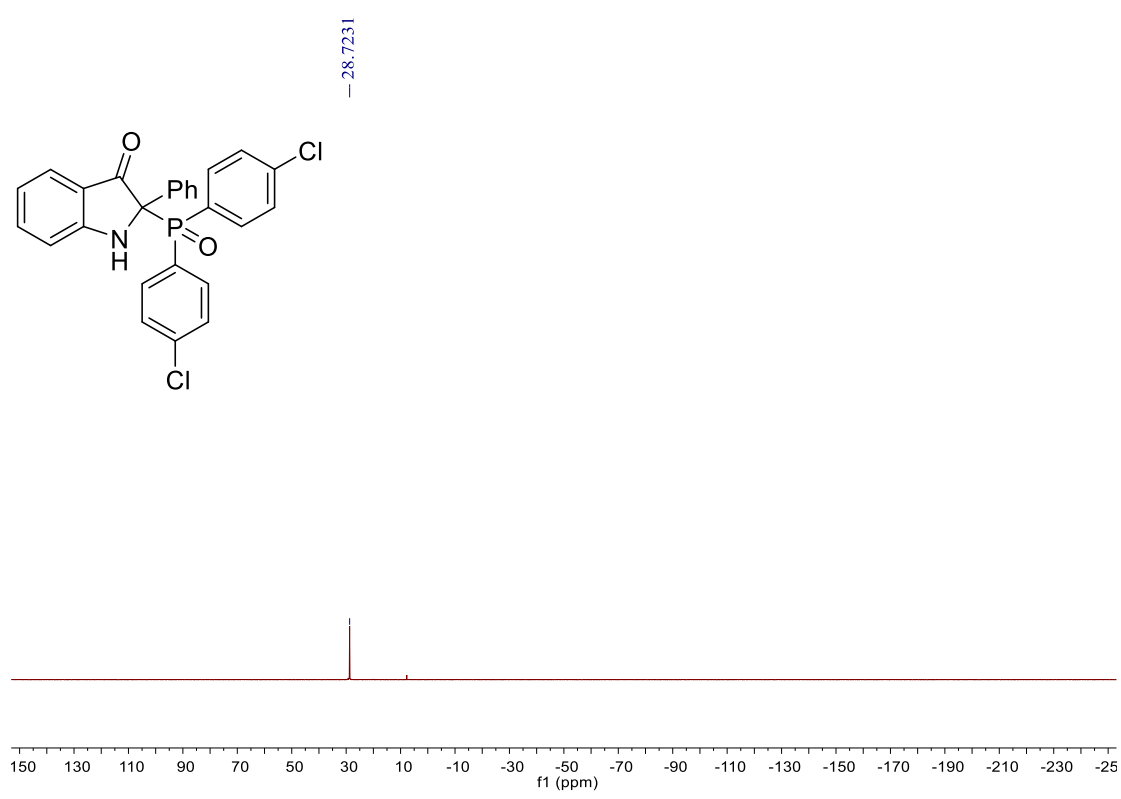

### 2-(bis(4-bromophenyl)phosphoryl)-2-phenylindolin-3-one (3v)

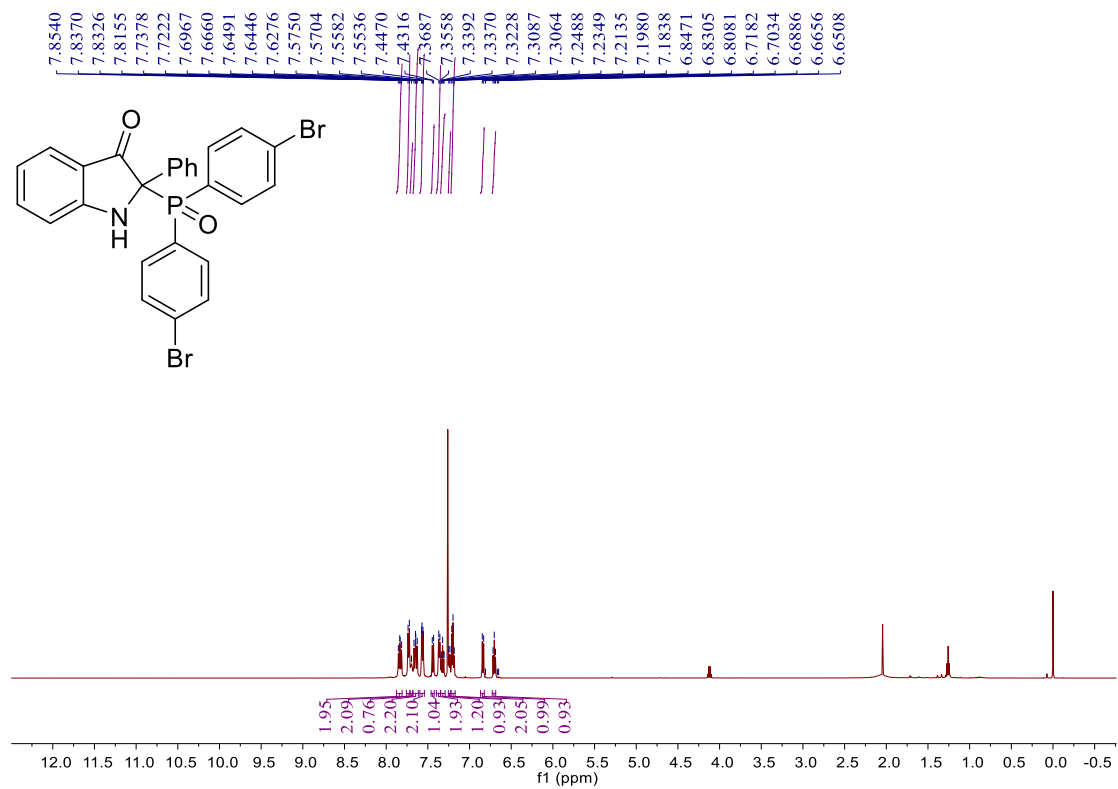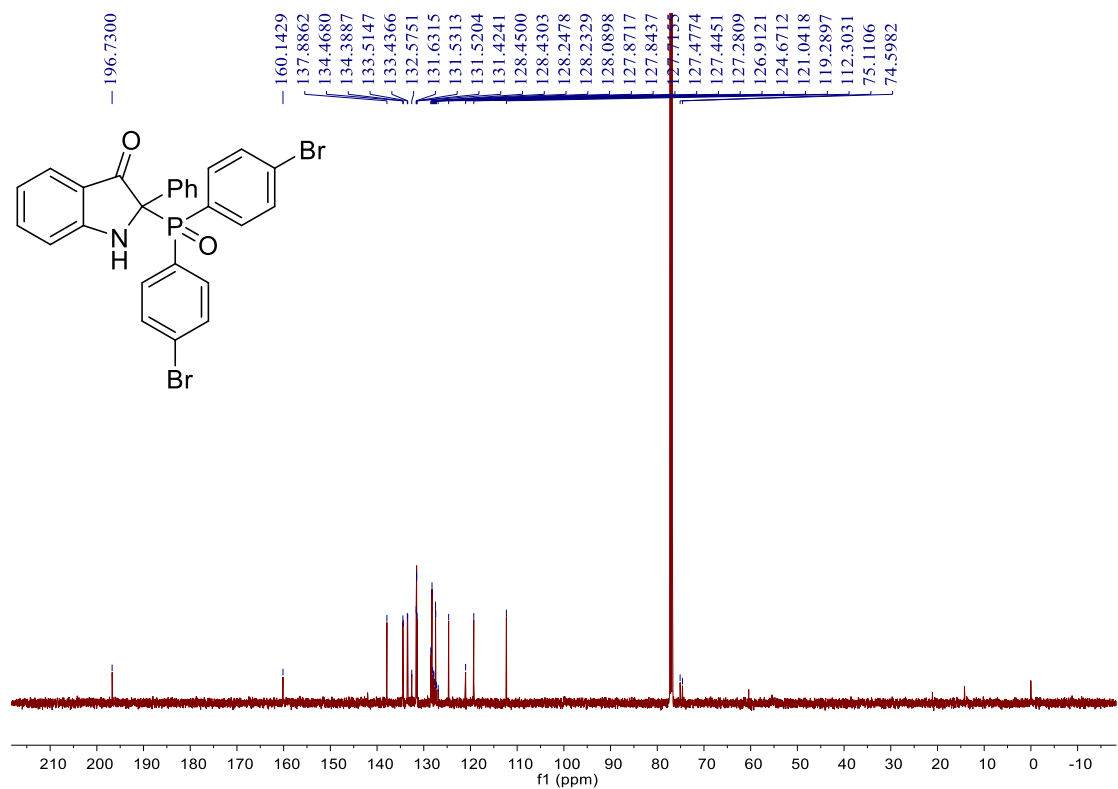

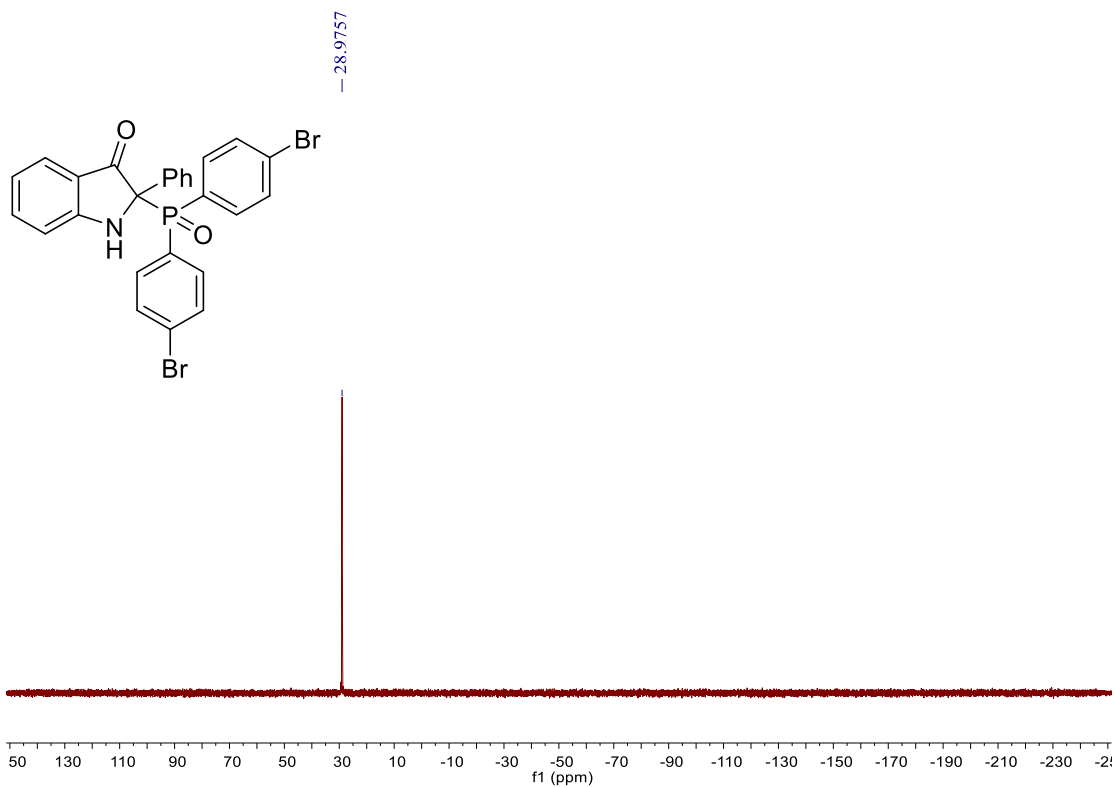

**2-(bis(4-(trifluoromethyl)phenyl)phosphoryl)-2-phenylindolin-3-one (3w)**

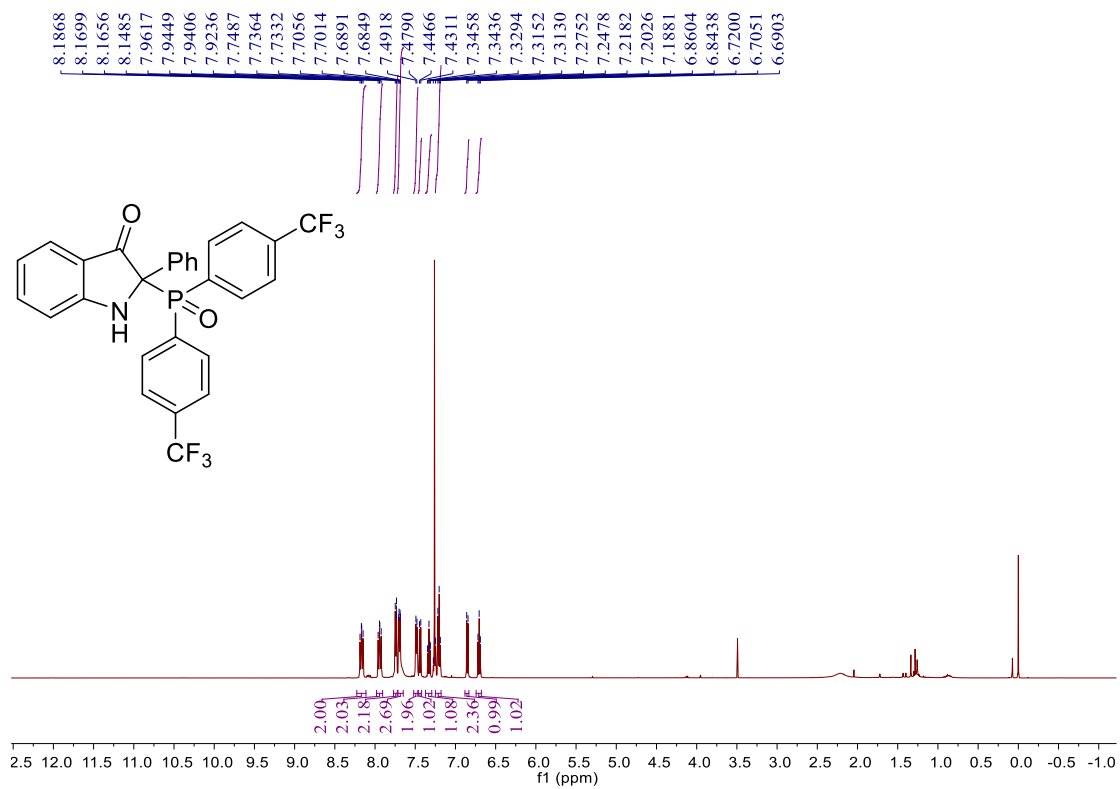

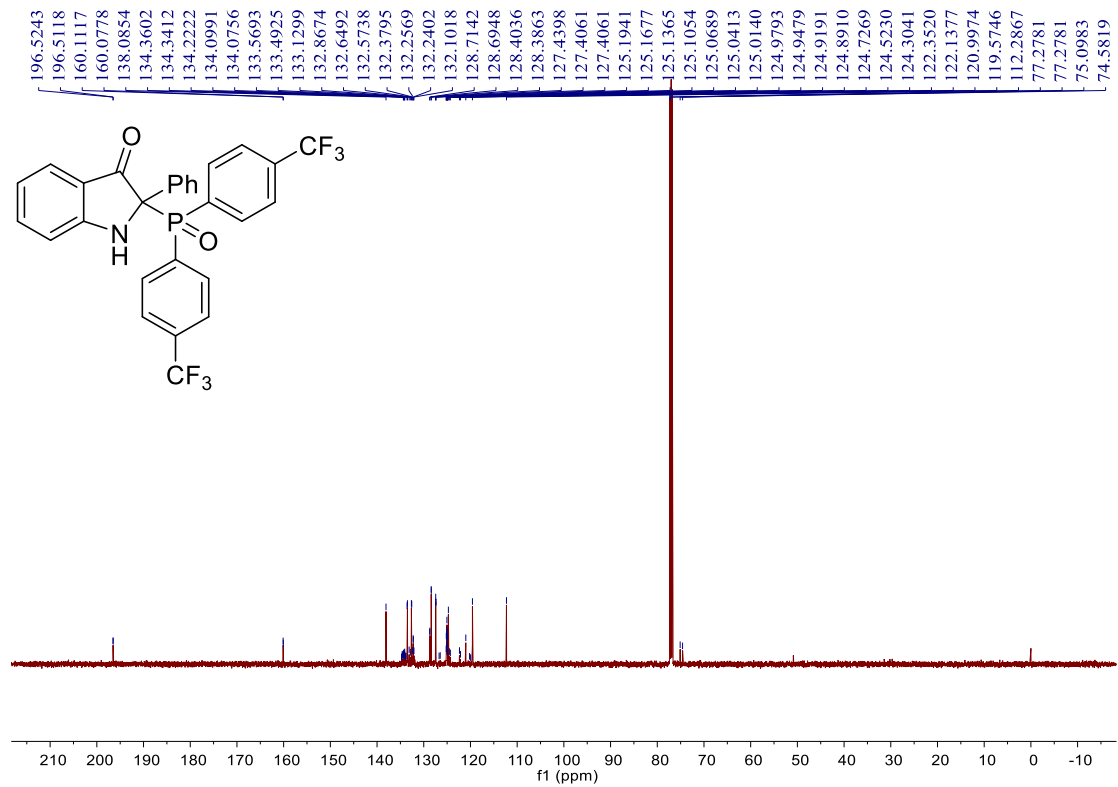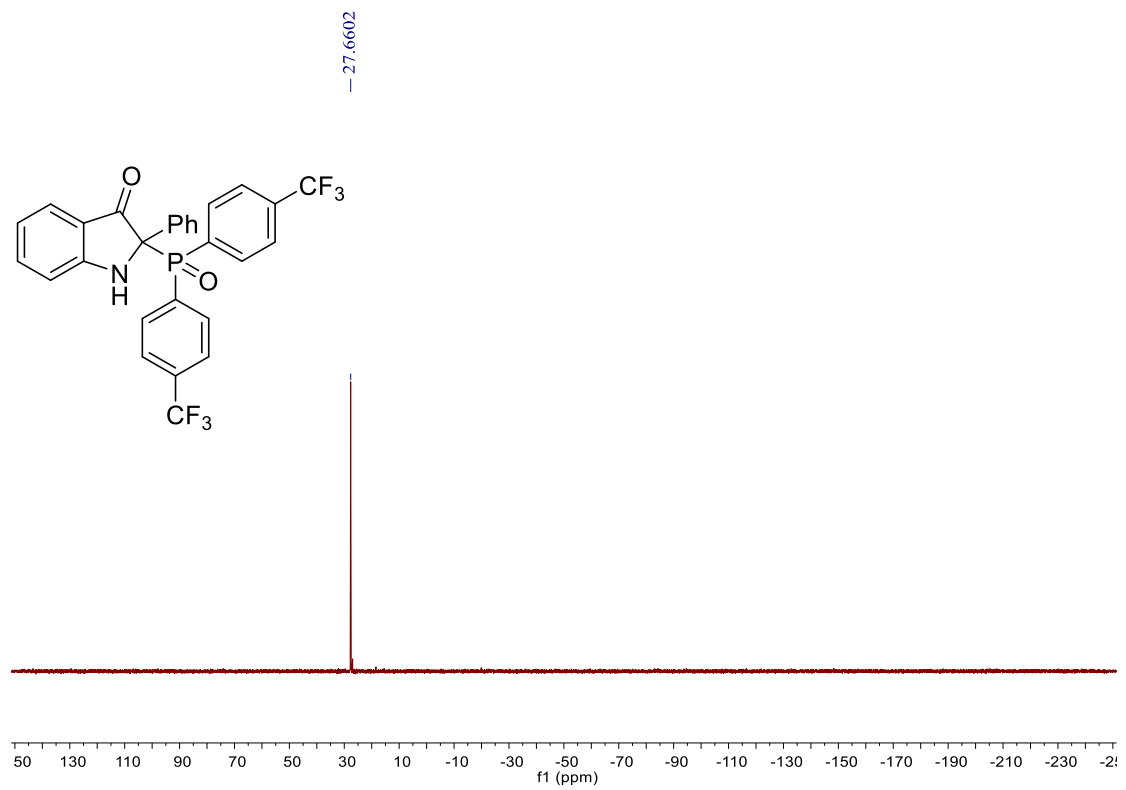

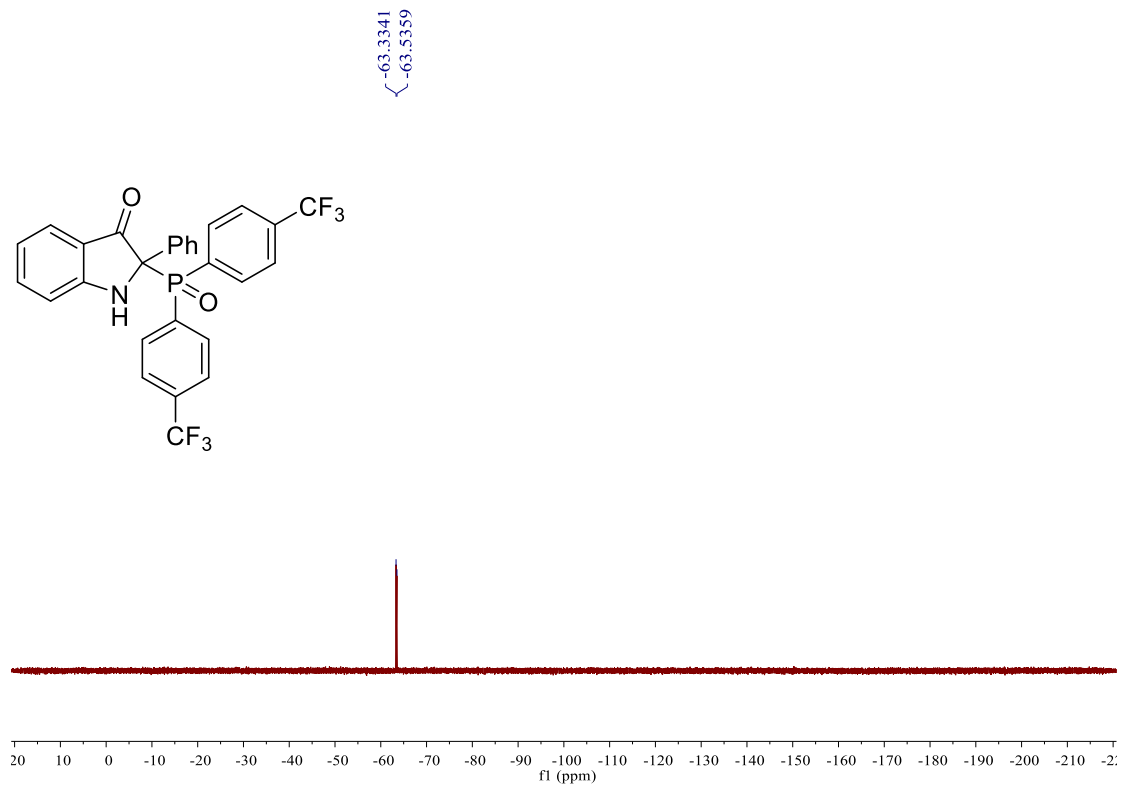

**2-(bis(3-(trifluoromethyl)phenyl)phosphoryl)-2-phenylindolin-3-one (3x)**

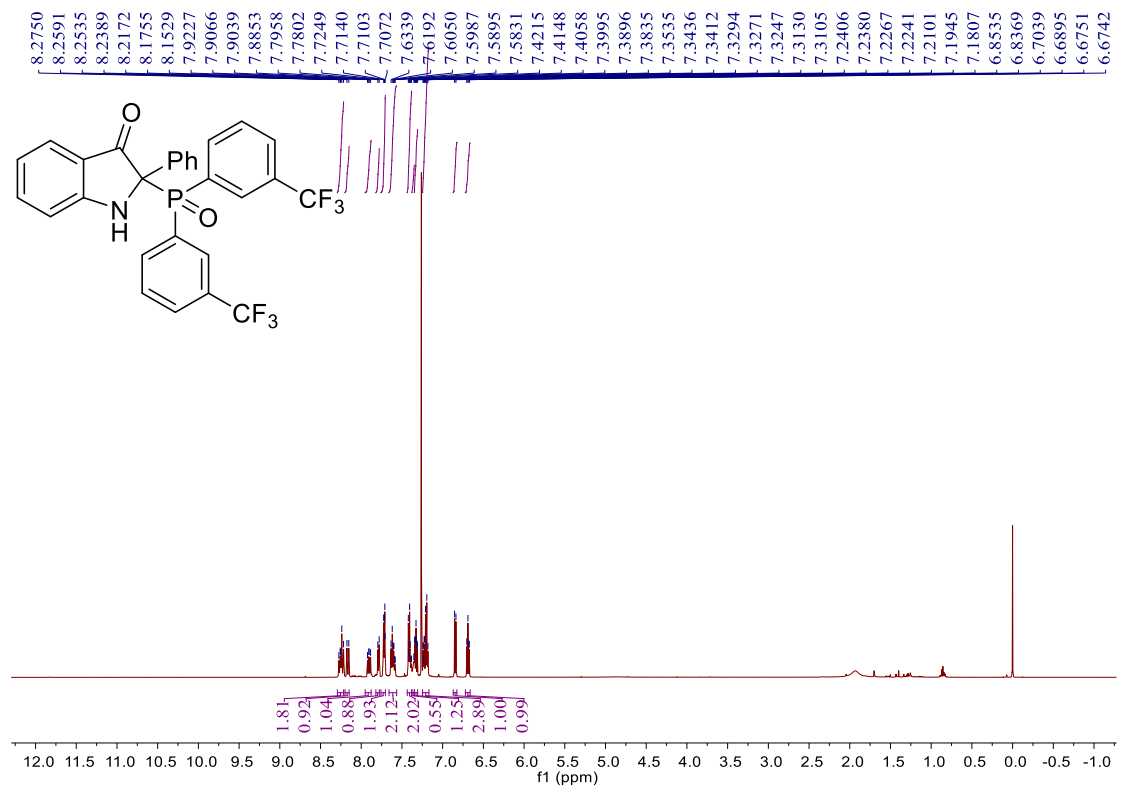

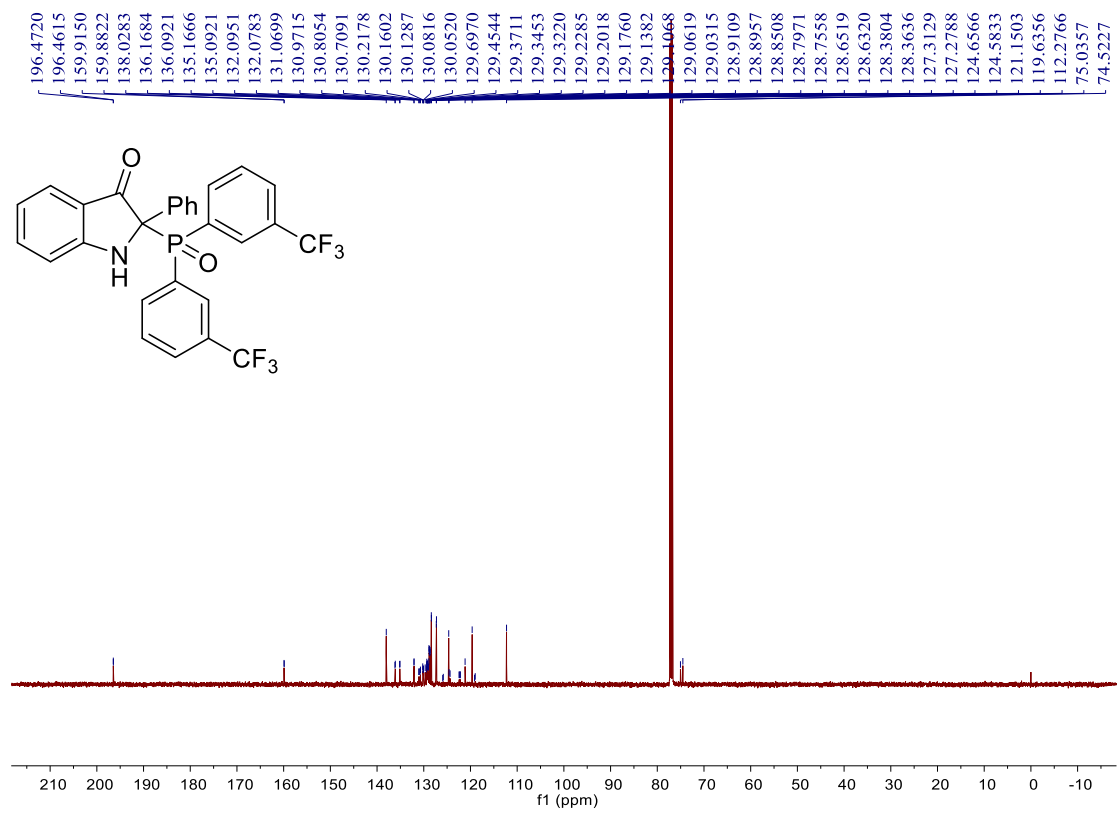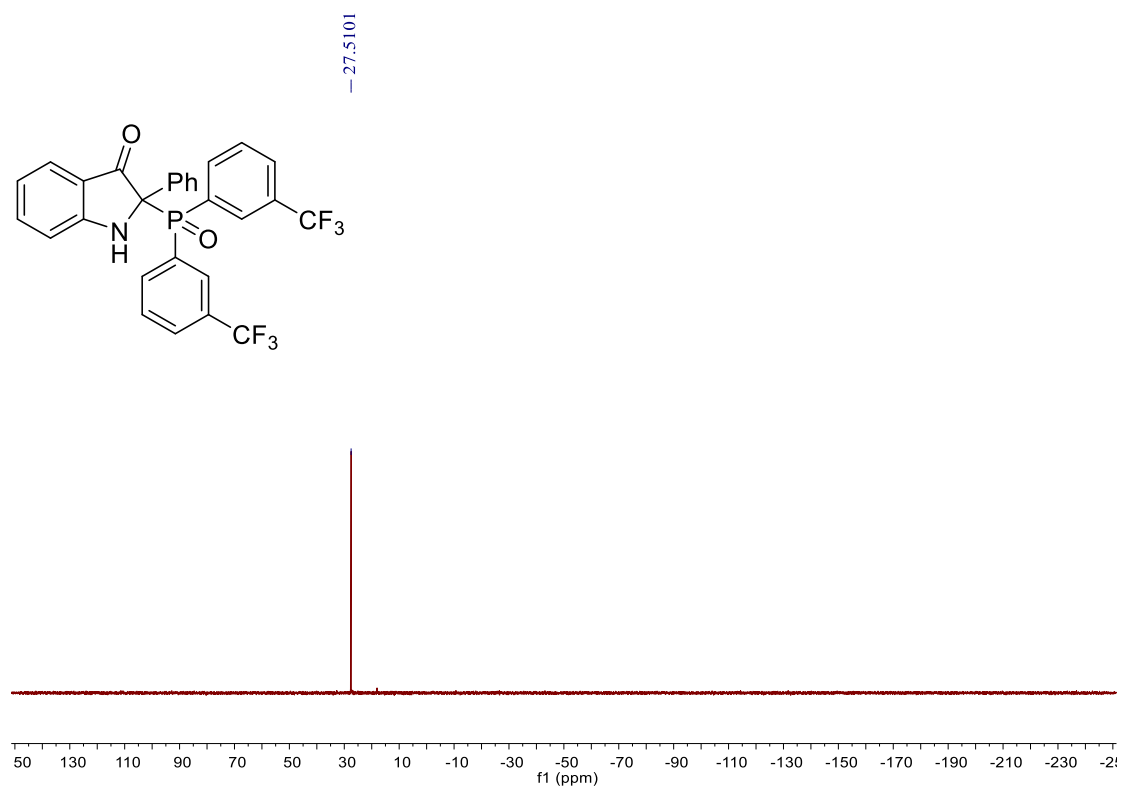

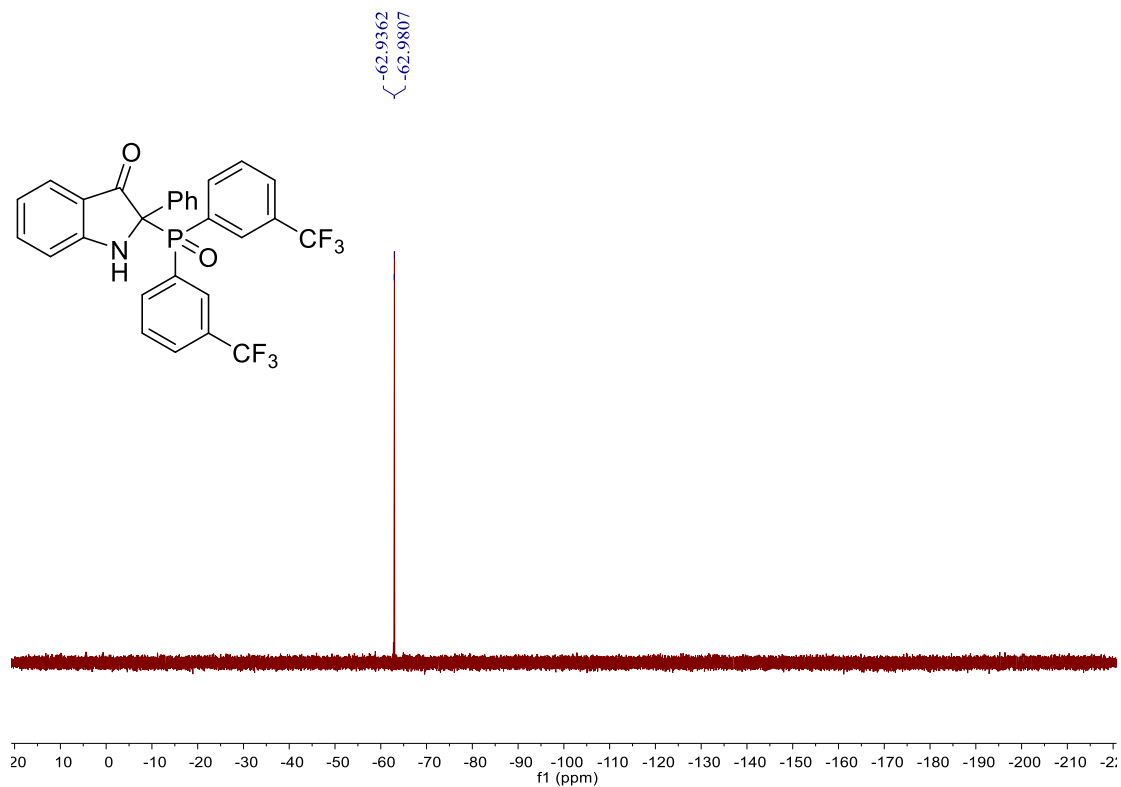

**2-(bis(3,5-bis(trifluoromethyl)phenyl)phosphoryl)-2-phenylindolin-3-one (3y)**

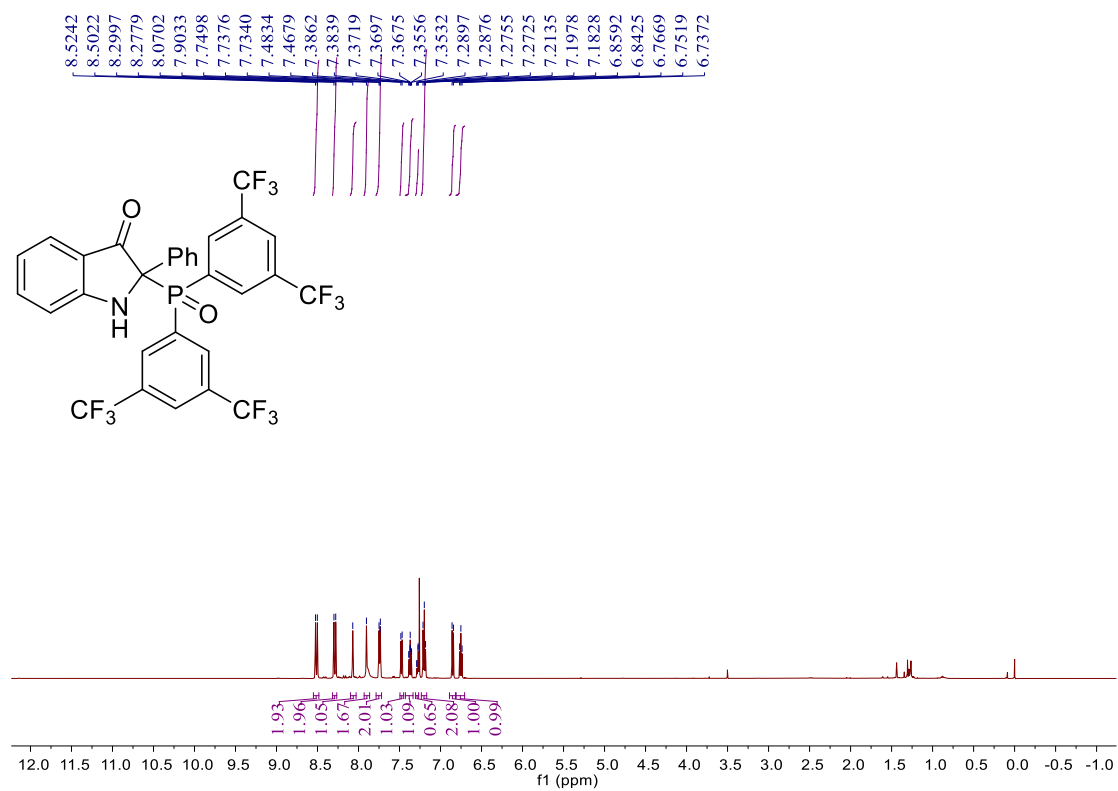



196.1993  
 196.1838  
 160.1000  
 160.0618  
 138.6281  
 133.2544  
 133.2318  
 133.1813  
 133.1536  
 132.3164  
 132.2666  
 132.2200  
 132.1659  
 132.1304  
 132.0800  
 132.0454  
 131.9950  
 131.9479  
 131.8952  
 131.6232  
 131.5243  
 131.0795  
 131.0609  
 130.9913  
 130.7677  
 130.2117  
 129.2292  
 129.2087  
 128.7124  
 128.6952  
 127.1891  
 127.1536  
 126.6685  
 126.6436  
 126.6183  
 126.5898  
 126.5544  
 126.5278  
 126.5022  
 126.4781  
 124.8315  
 123.7499  
 123.4857  
 121.5704  
 121.3054  
 120.8152  
 120.1734  
 112.3274  
 75.0635  
 74.5227

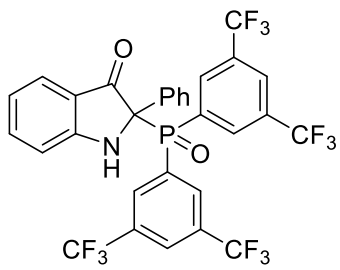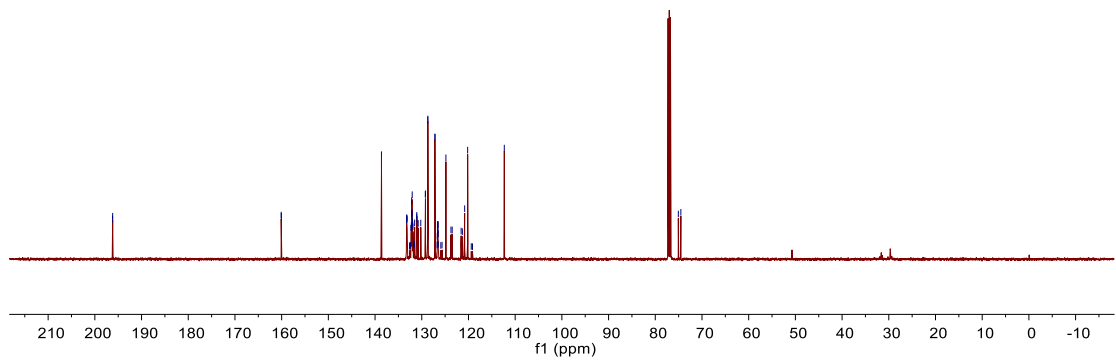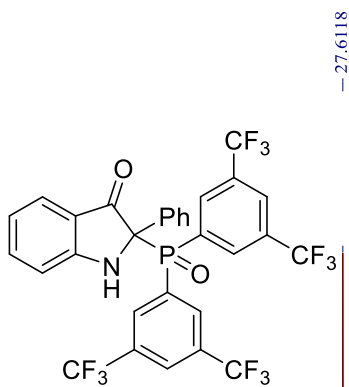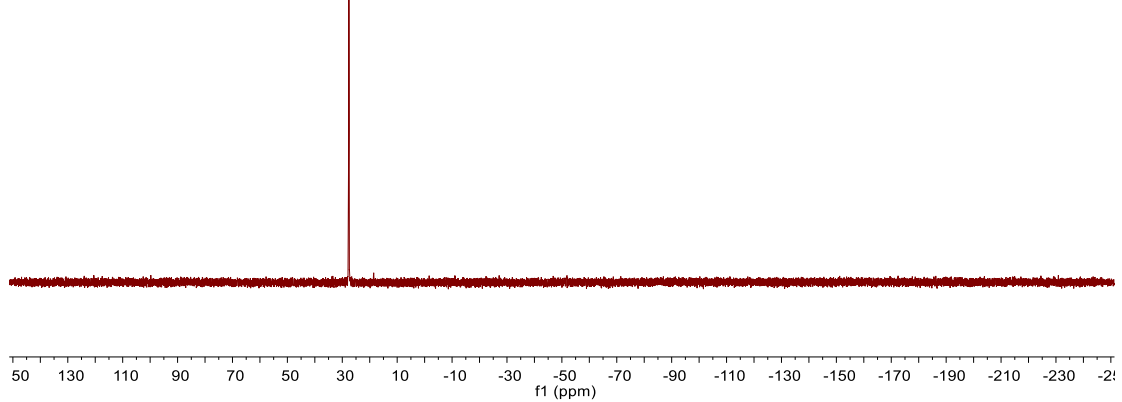

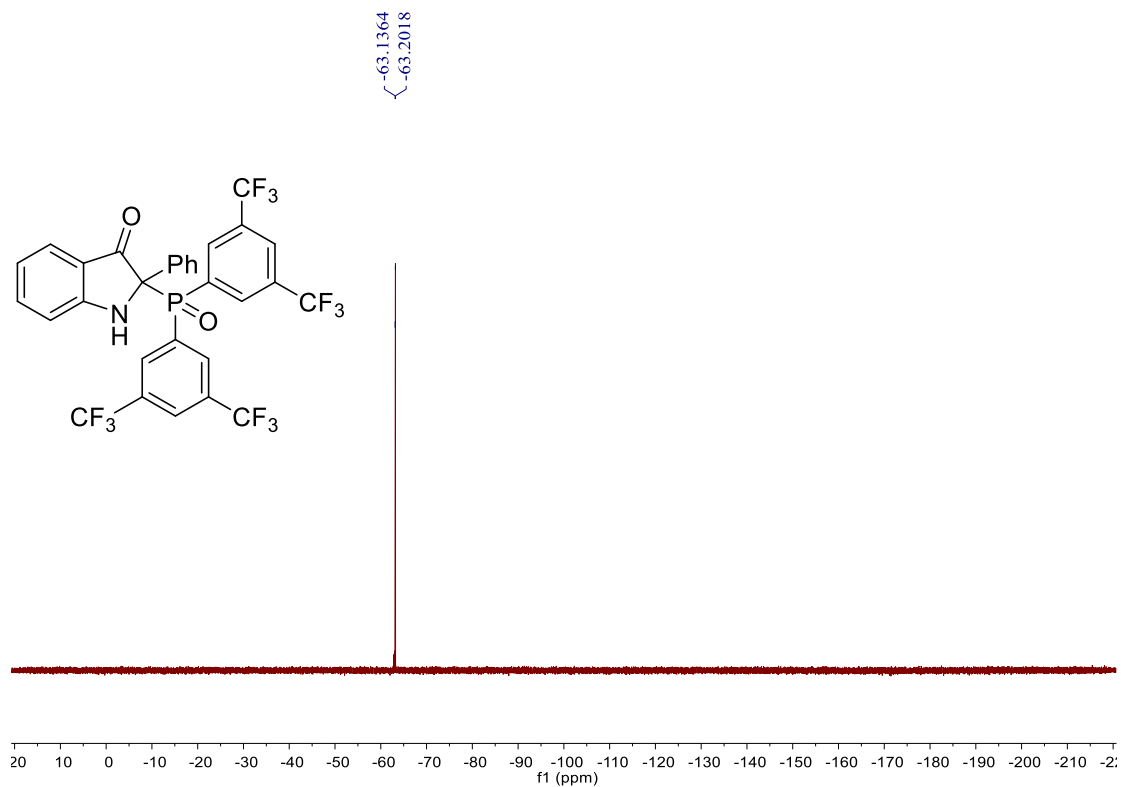

**2-phenyl-2-(phenyl(propyl)phosphoryl)indolin-3-one (3z)**

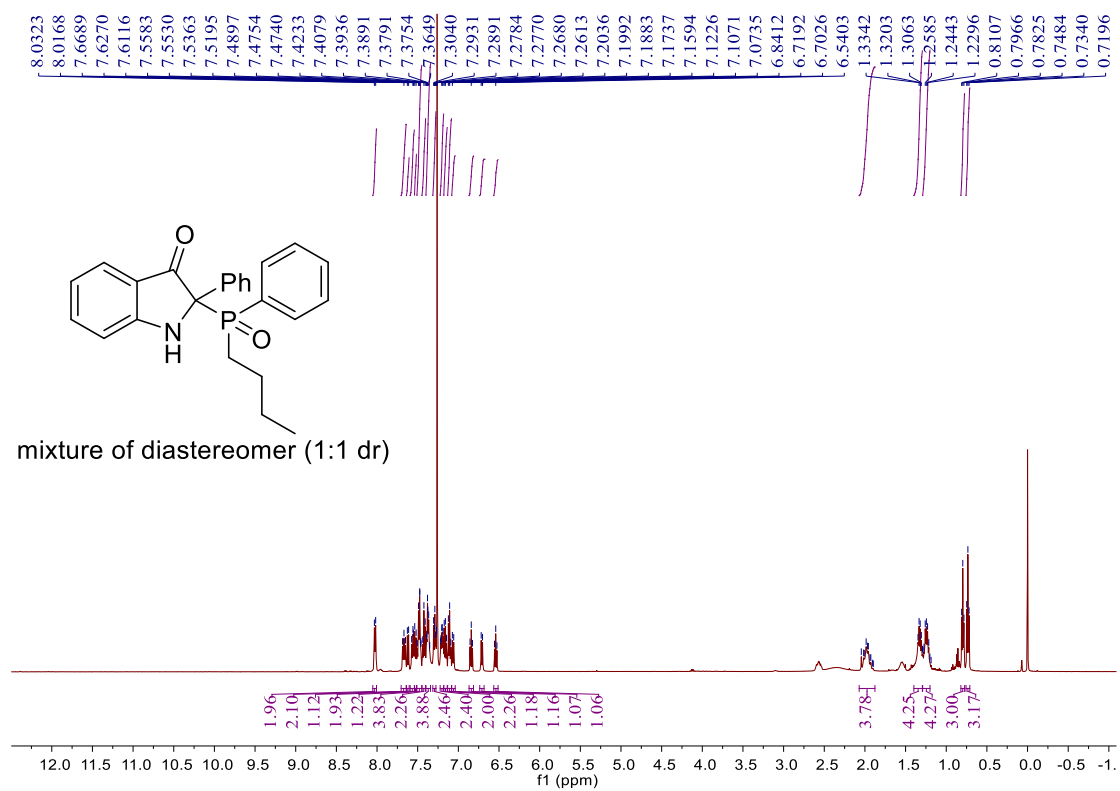

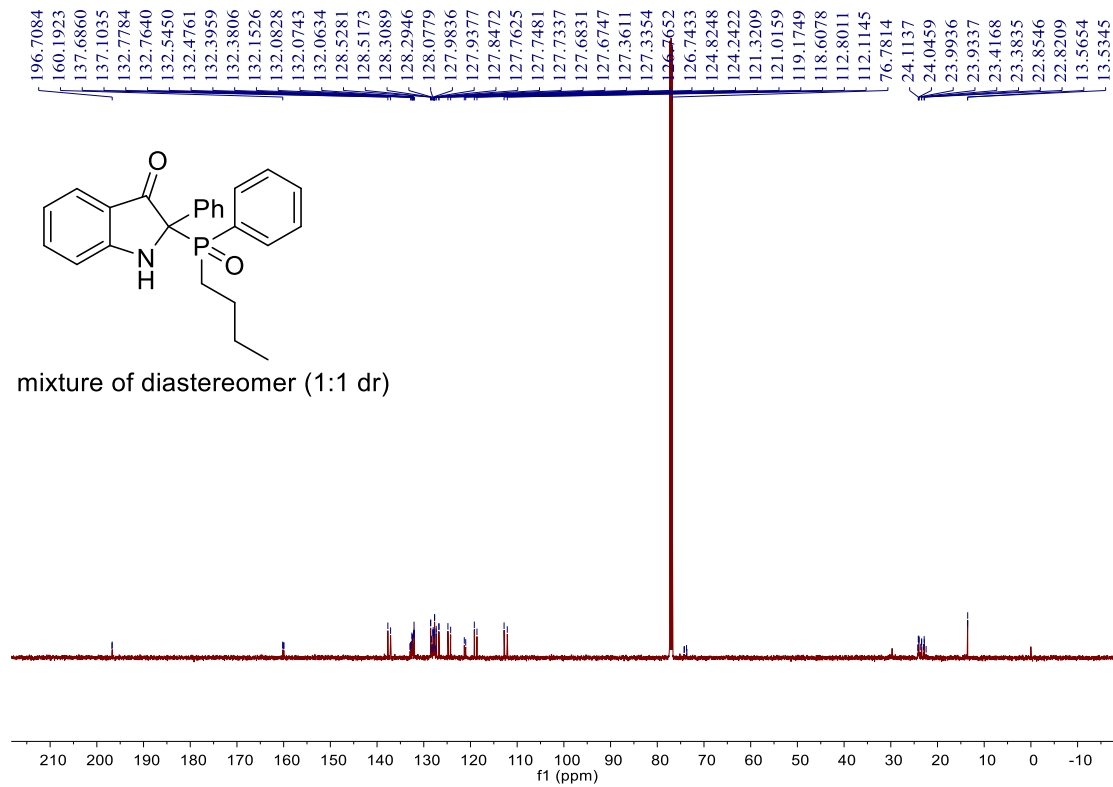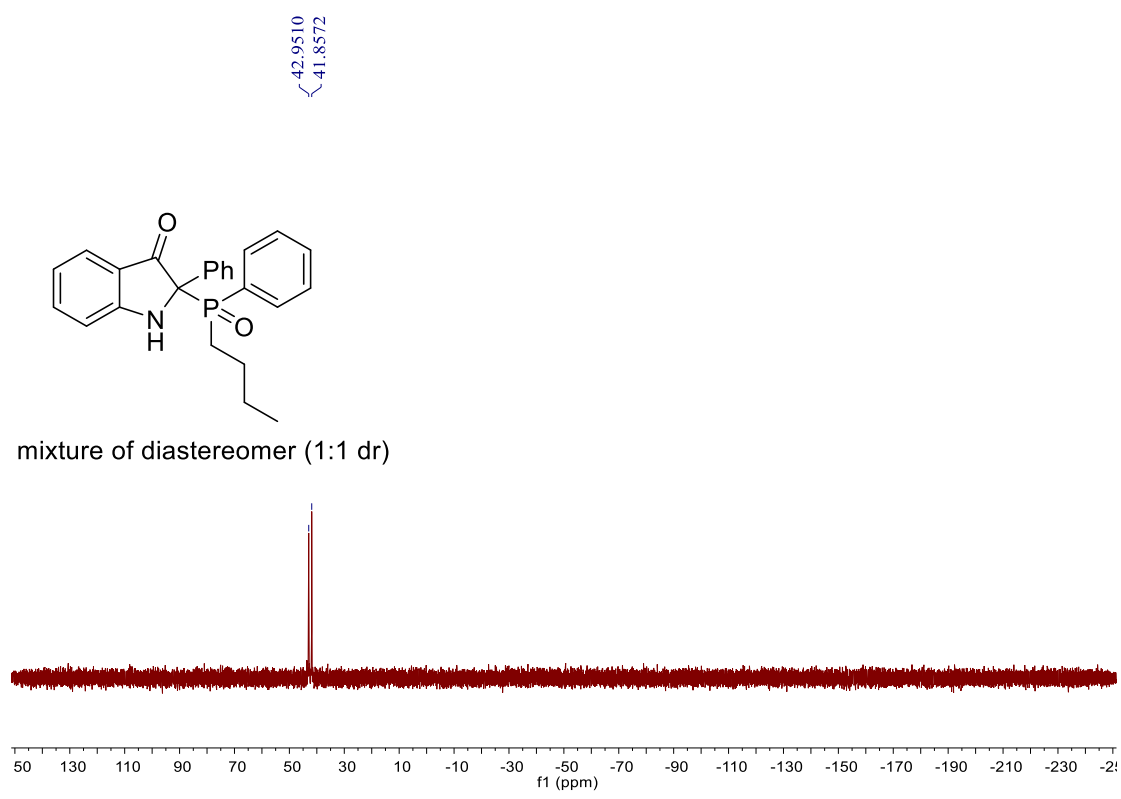

**2-(dimethylphosphoryl)-2-phenylindolin-3-one (3aa).**

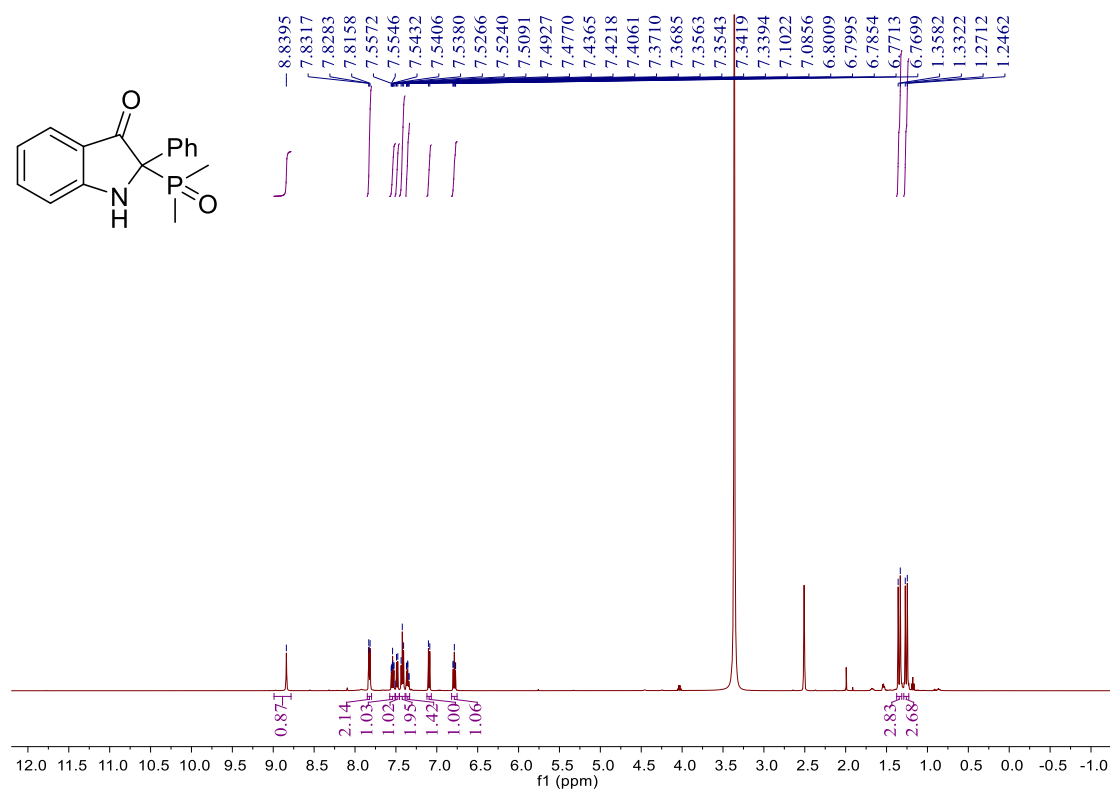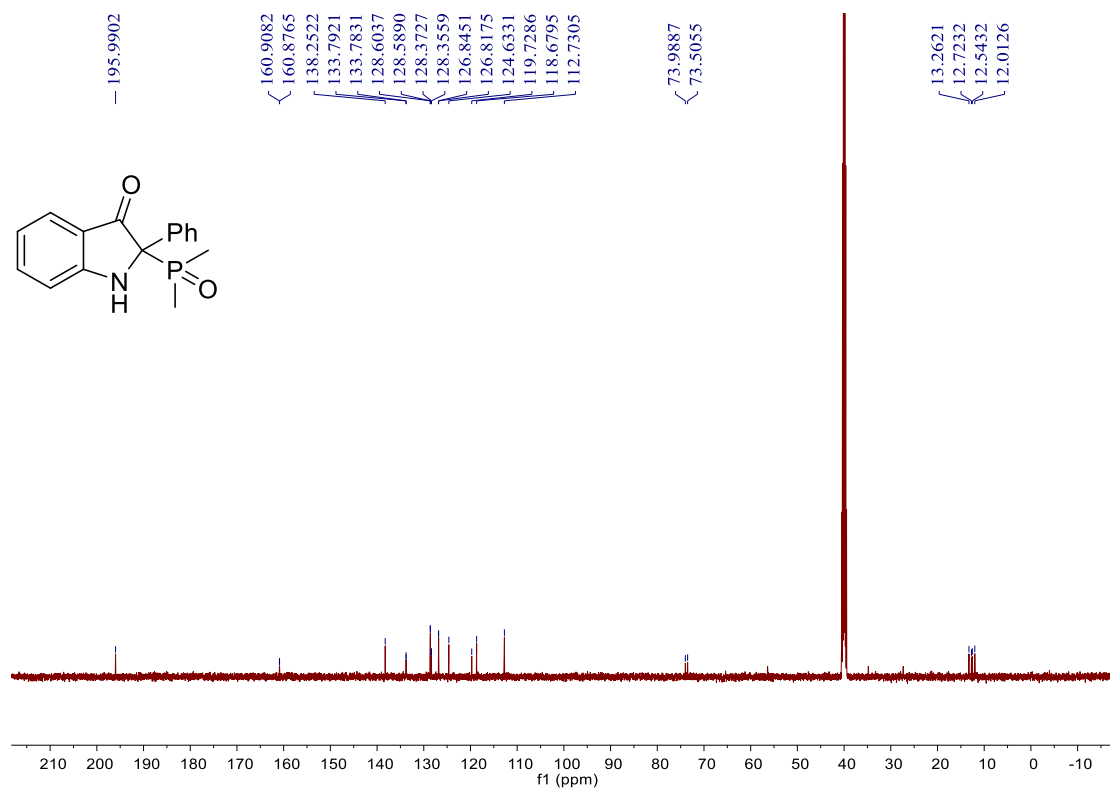

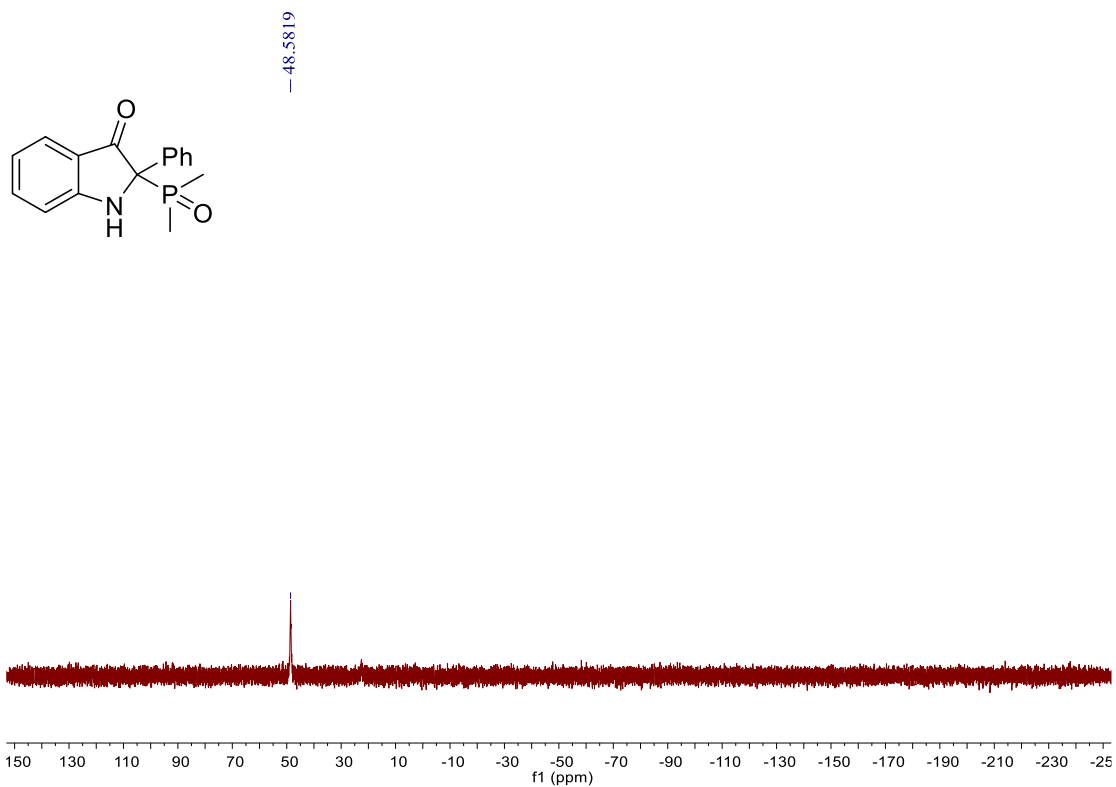

**ethyl (3-oxo-2-phenylindolin-2-yl)(phenyl)phosphate(3ab)**

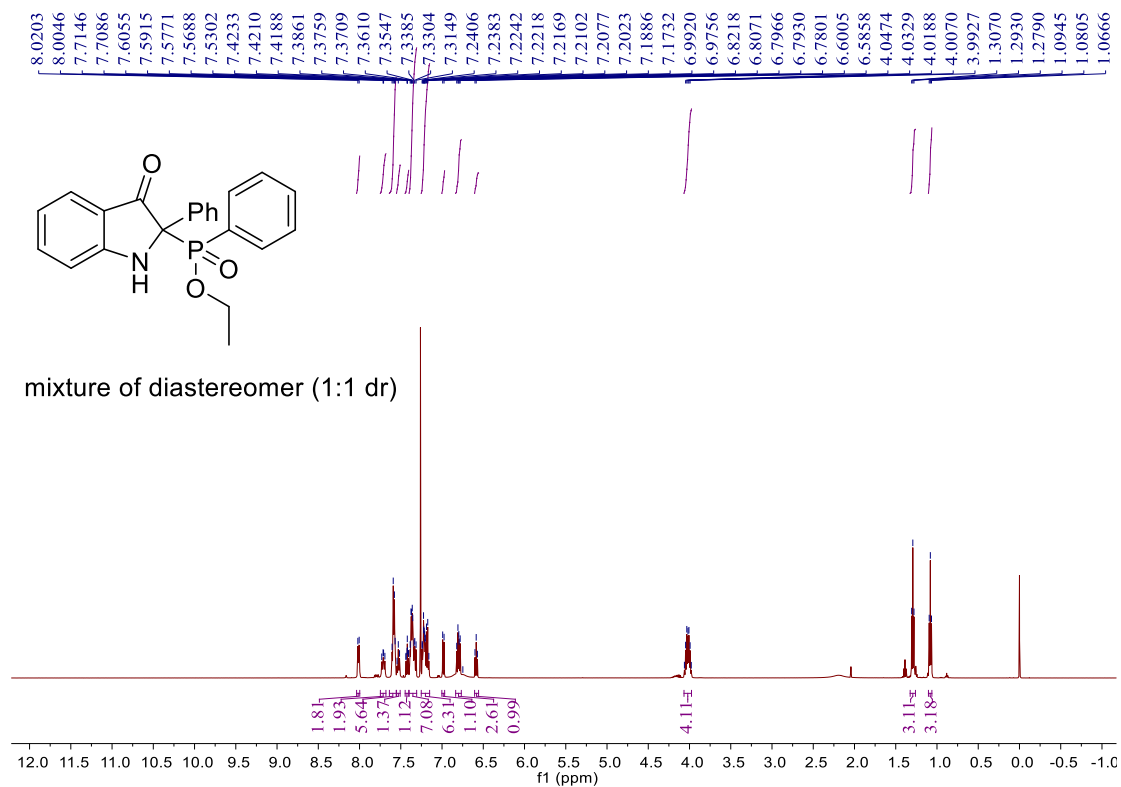

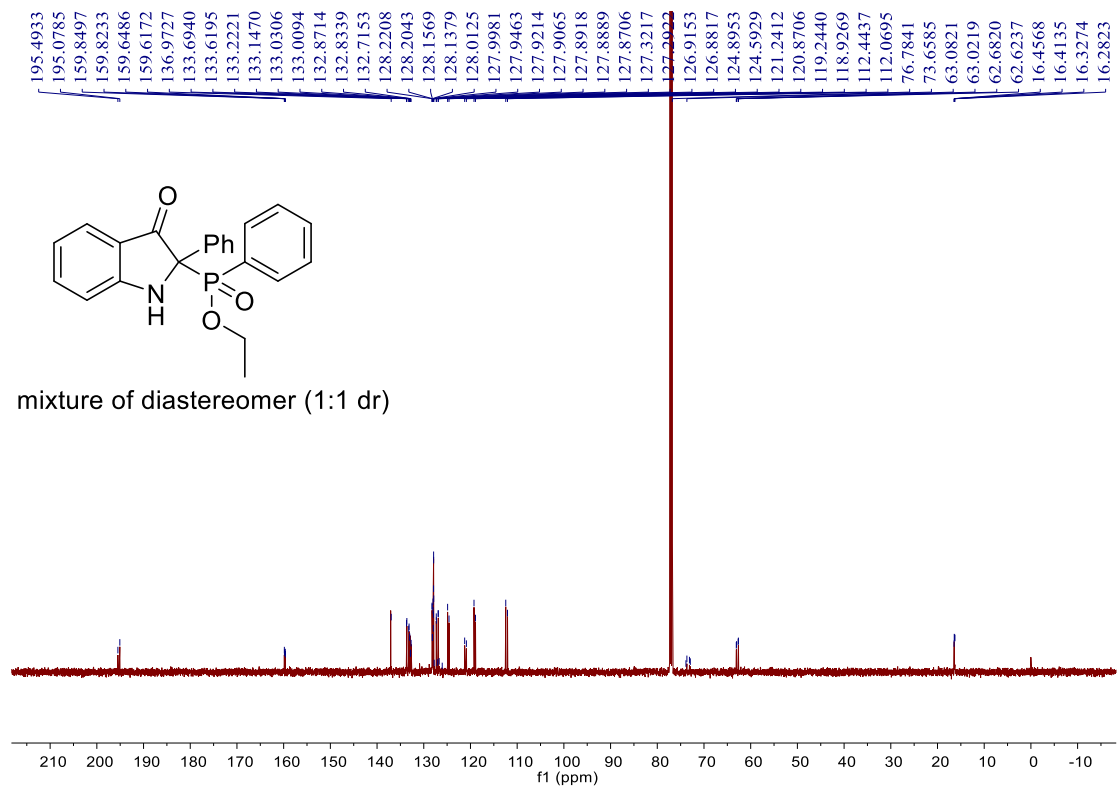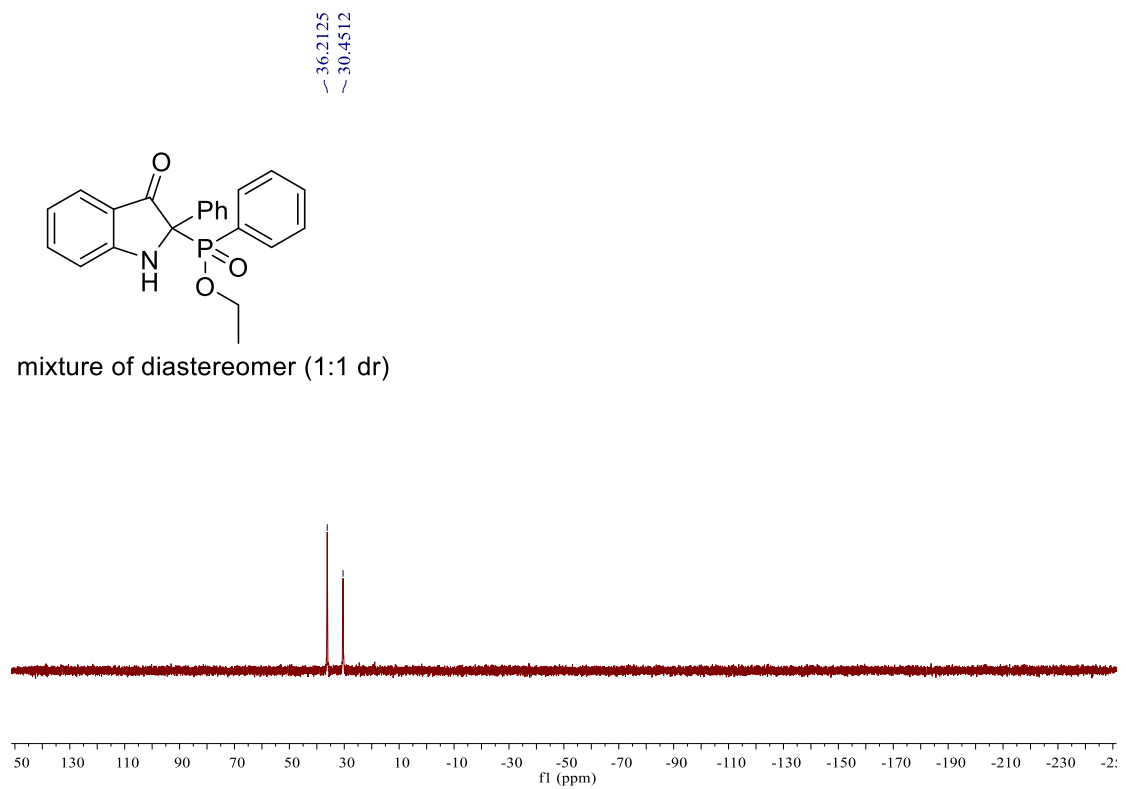

diethyl (3-oxo-2-phenylindolin-2-yl)phosphonate(3ac)

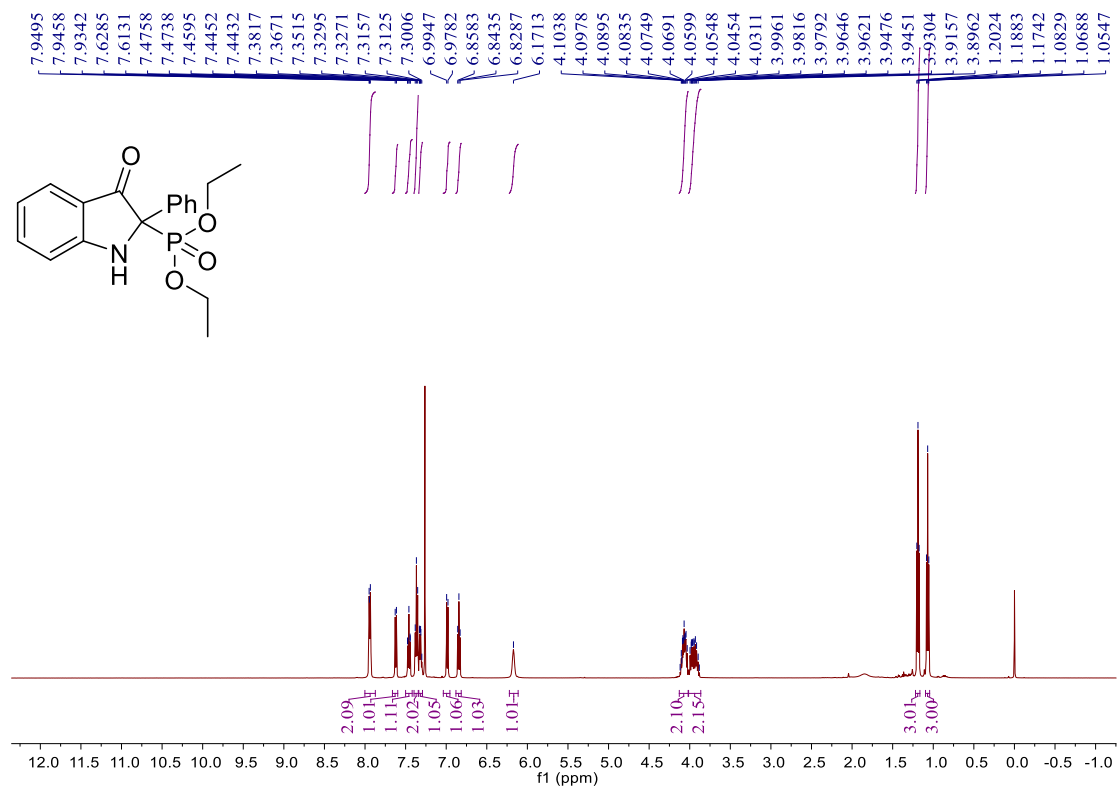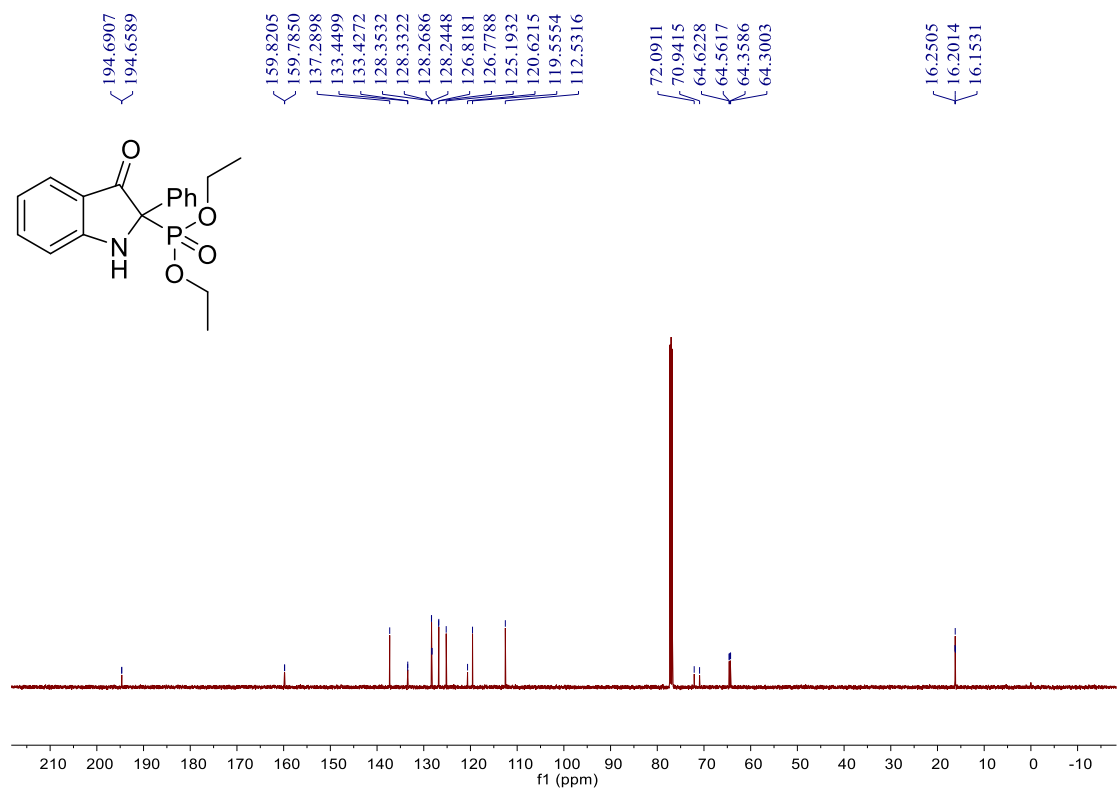

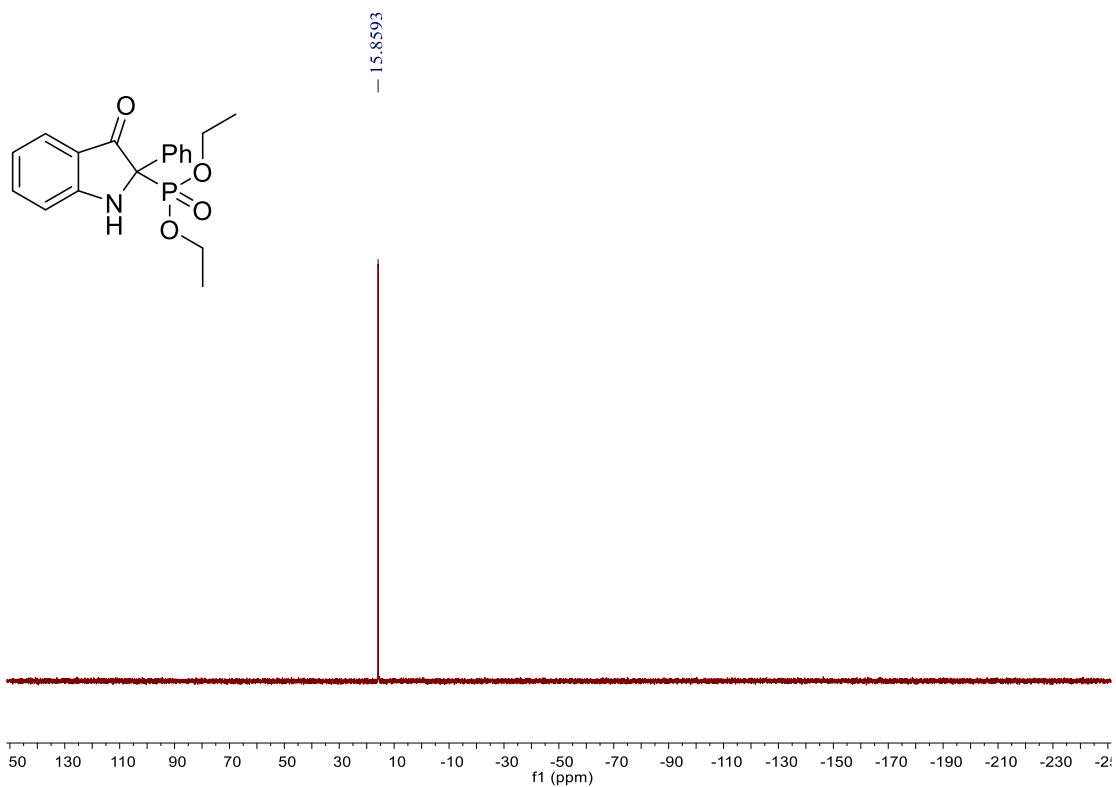

**dimethyl (3-oxo-2-phenylindolin-2-yl)phosphonate(3ad).**

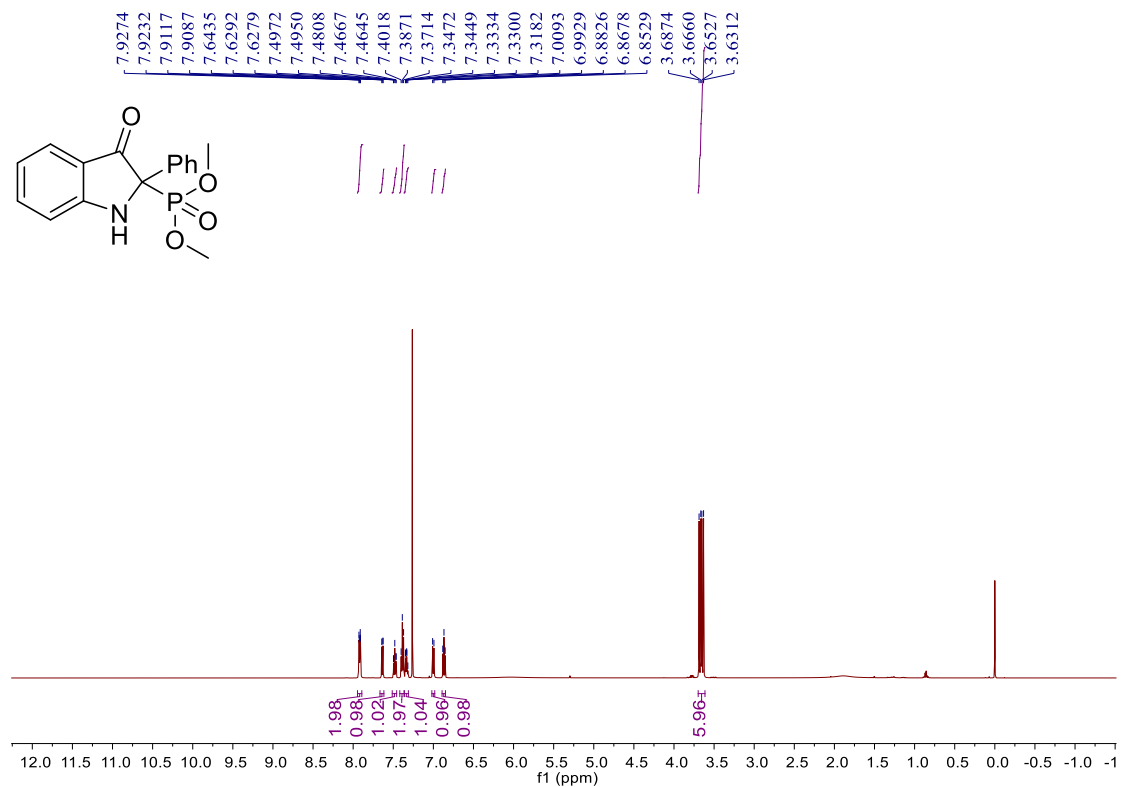



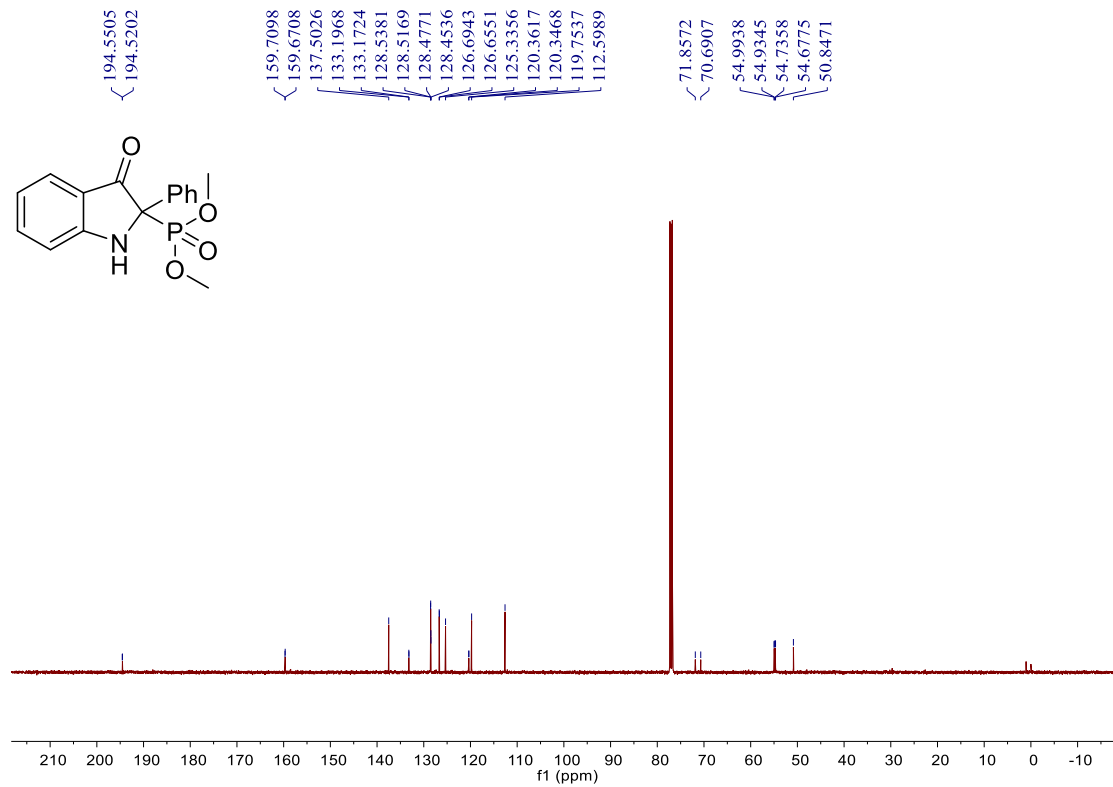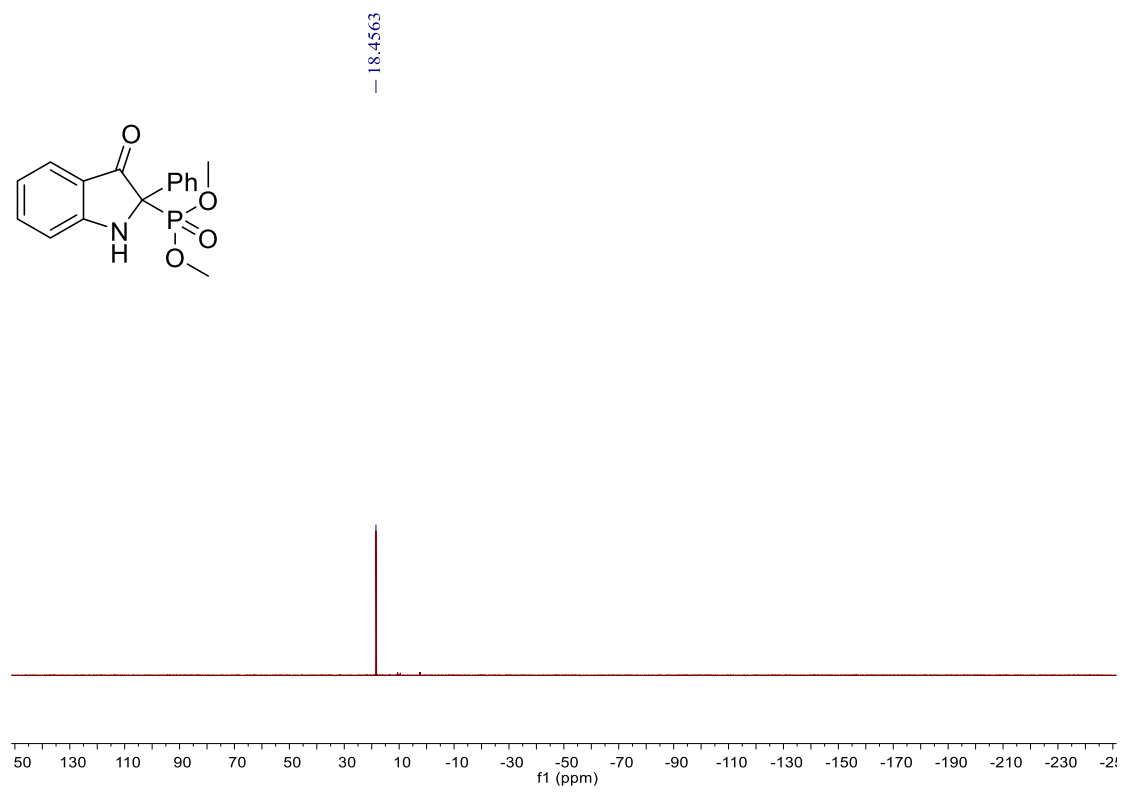

Supplement: d2ob01063a1.pdf [file d2ob01063a1.pdf]
